# Supplementary material for: γ-Hydroxy-γ-butyrolactams as 1,2-bis-electrophiles in a Brønsted/Lewis acid-free synthesis of condensed nitrogen heterocycles
Source: Royal Society of Chemistry journal article supplement (doi:10.1039/d4nj01595a), 2024-01-01
Supplement: d4nj01595a1.pdf [file d4nj01595a1.pdf]

Electronic Supplementary Material (ESI)

## **$\gamma$ -Hydroxy- $\gamma$ -butyrolactams as 1,2-bis-electrophiles in a Brønsted/Lewis acid-free synthesis of condensed nitrogen heterocycles**

**Nicolai A. Aksenov,\* Igor A. Kurenkov, Nikolai A. Arutiunov, Vladimir V. Malyuga, Dmitrii A. Aksenov, Alexander V. Leontiev, Alexander V. Aksenov**

Department of Chemistry, North Caucasus Federal University, 1a Pushkin St., 355017 Stavropol, Russia

\*corresponding author: [naksenov@ncfu.ru](mailto:naksenov@ncfu.ru)

|                                                                                                                                                                     |            |
|---------------------------------------------------------------------------------------------------------------------------------------------------------------------|------------|
| <b><math>^1\text{H}</math> and <math>^{13}\text{C}</math> NMR spectral charts.....</b>                                                                              | <b>S2</b>  |
| <b><math>^1\text{H}</math> and <math>^{13}\text{C}</math> NMR spectral charts for 5-hydroxy-5-(3-methoxyphenyl)-3-phenyl-1,5-dihydro-2H-pyrrol-2-one (1ca).....</b> | <b>S2</b>  |
| <b><math>^1\text{H}</math> and <math>^{13}\text{C}</math> NMR spectral charts for quinoxalines 8.....</b>                                                           | <b>S4</b>  |
| <b><math>^1\text{H}</math> and <math>^{13}\text{C}</math> NMR spectral charts for imidazopyridines 10.....</b>                                                      | <b>S18</b> |
| <b><math>^1\text{H}</math> and <math>^{13}\text{C}</math> NMR spectral charts for 3,5-diphenyl-3H-pyrrol-2-one 15aa.....</b>                                        | <b>S52</b> |
| <b><math>^1\text{H}</math> and <math>^{13}\text{C}</math> NMR spectral charts for <i>N</i>-(2-aminophenyl)-2-phenylacetamide 16aa.....</b>                          | <b>S54</b> |
| <b><math>^1\text{H}</math> and <math>^{13}\text{C}</math> NMR spectral charts for 2-Benzyl-1<i>H</i>-benzo[<i>d</i>]imidazole 17aa.....</b>                         | <b>S56</b> |
| <b>HRMS spectral charts.....</b>                                                                                                                                    | <b>S58</b> |
| <b>HRMS spectral chart for 5-hydroxy-5-(3-methoxyphenyl)-3-phenyl-1,5-dihydro-2H-pyrrol-2-one 1ca.....</b>                                                          | <b>S58</b> |
| <b>HRMS spectral charts for quinoxalines 8.....</b>                                                                                                                 | <b>S59</b> |
| <b>HRMS spectral charts for 2-aryl-3-benzylimidazo[1,2-<i>a</i>]pyridines 10.....</b>                                                                               | <b>S63</b> |
| <b>HRMS spectral chart for 3,5-diphenyl-3H-pyrrol-2-one 15aa.....</b>                                                                                               | <b>S72</b> |
| <b>HRMS spectral chart for <i>N</i>-(2-aminophenyl)-2-phenylacetamide 16aa.....</b>                                                                                 | <b>S73</b> |
| <b>HRMS spectral chart for 2-Benzyl-1<i>H</i>-benzo[<i>d</i>]imidazole 17aa.....</b>                                                                                | <b>S74</b> |
| <b>HRMS spectral chart of aqueous phase of the reaction between hydroxylactam 1aa and phenylenediamine 6a.....</b>                                                  | <b>S75</b> |

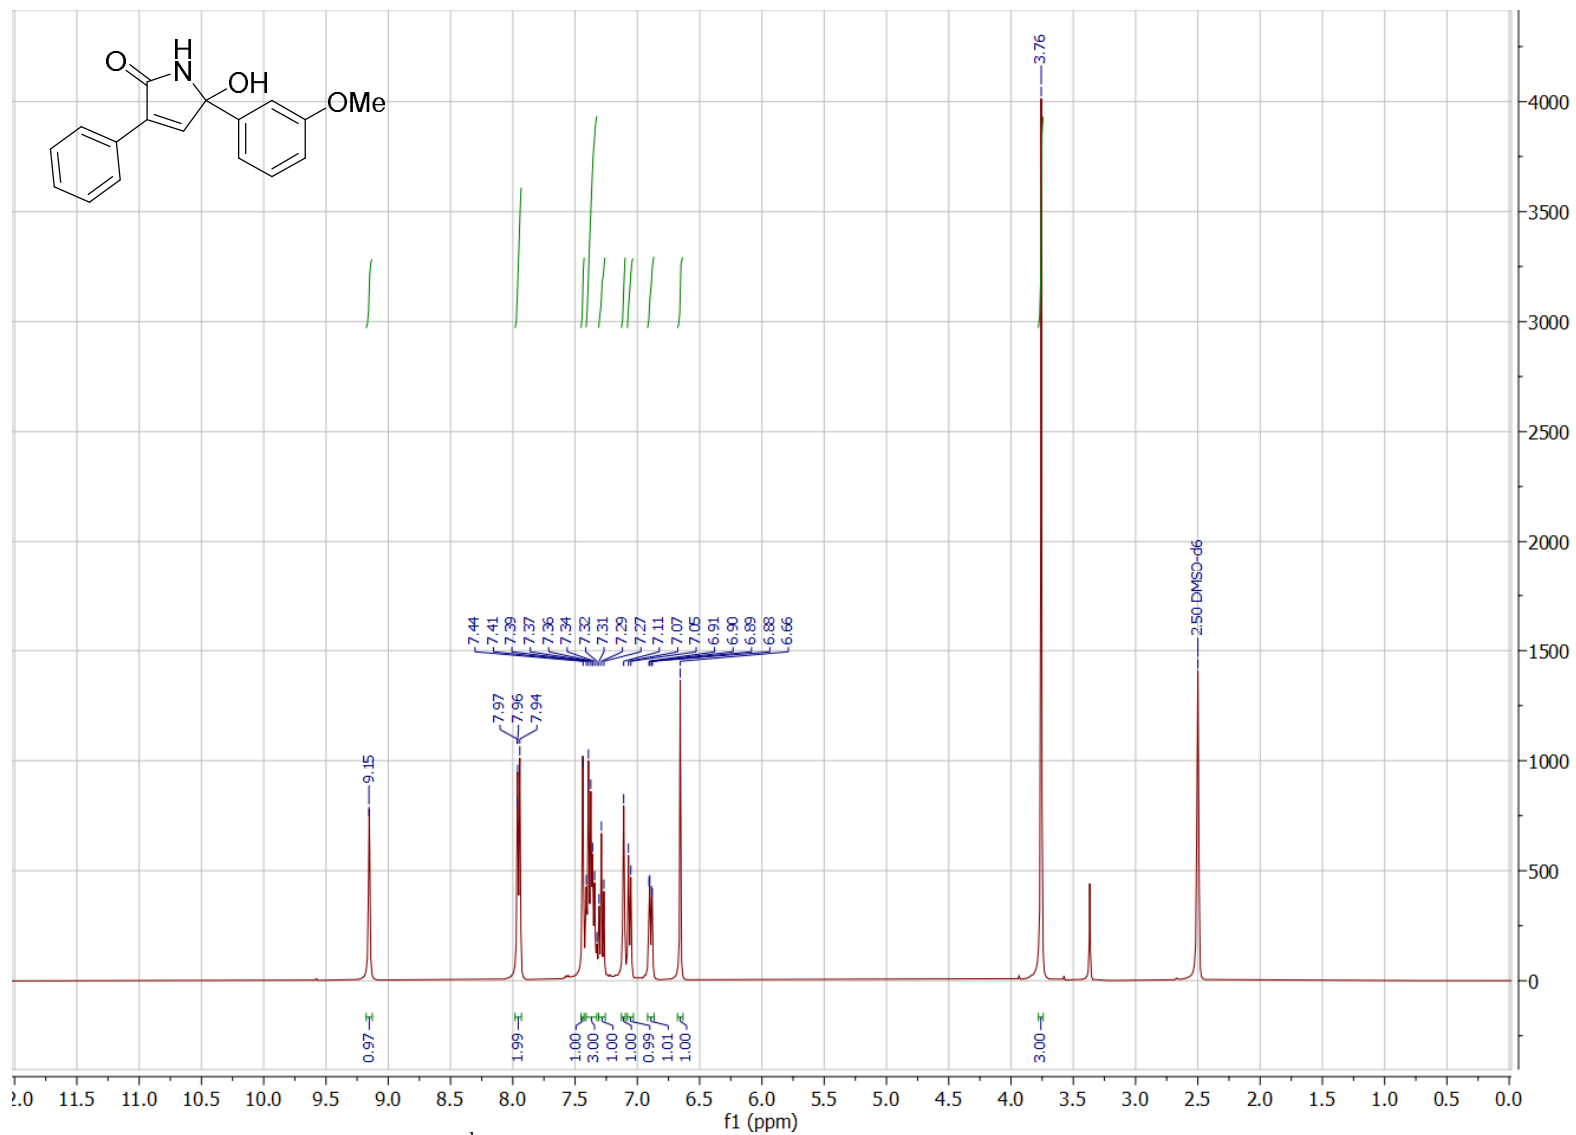

Figure S1. <sup>1</sup>H NMR spectrum of hydroxylactam **1ca** in DMSO-*d*<sub>6</sub> (400 MHz)

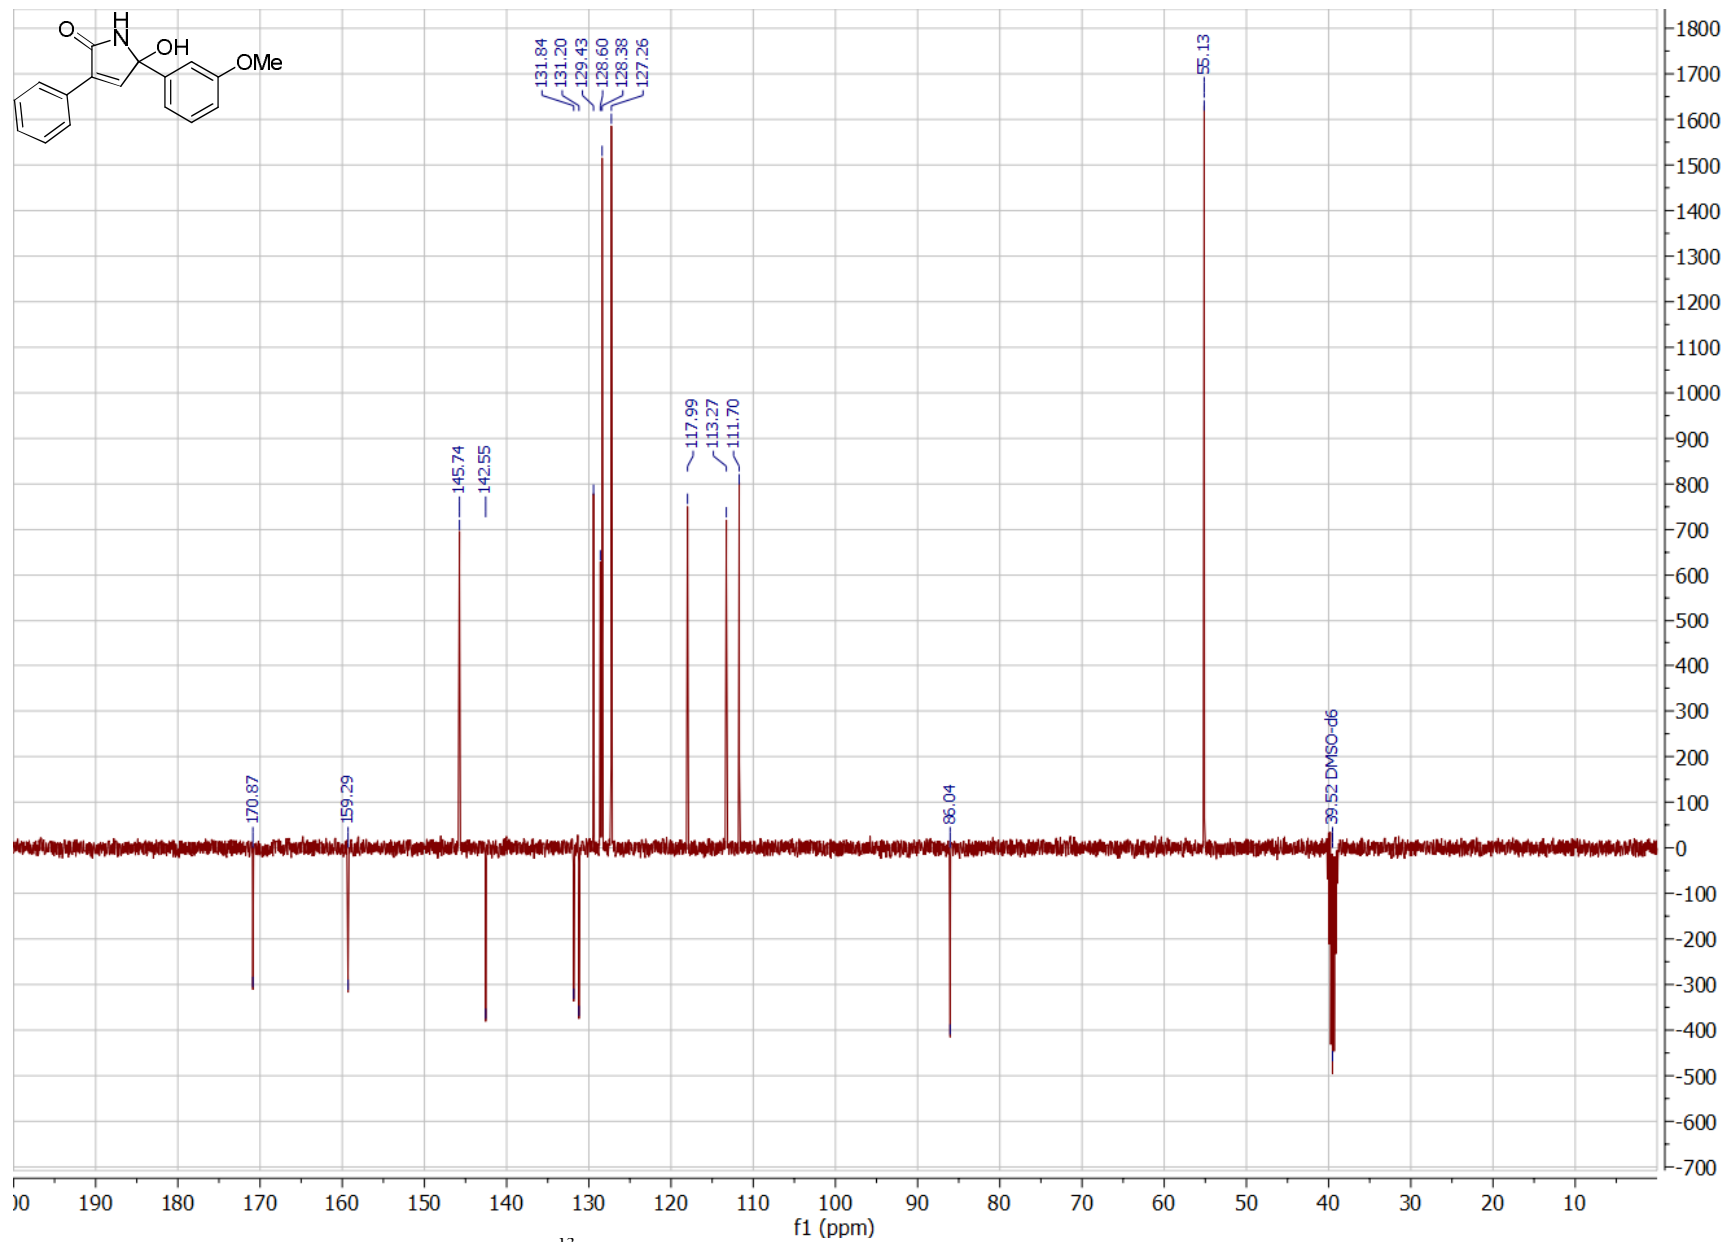

Figure S2.  $^{13}\text{C}$  NMR spectrum of hydroxylactam **1ca** in  $\text{DMSO-}d_6$  (101 MHz)

<sup>1</sup>H and <sup>13</sup>C NMR spectral charts for quinoxalines **8**

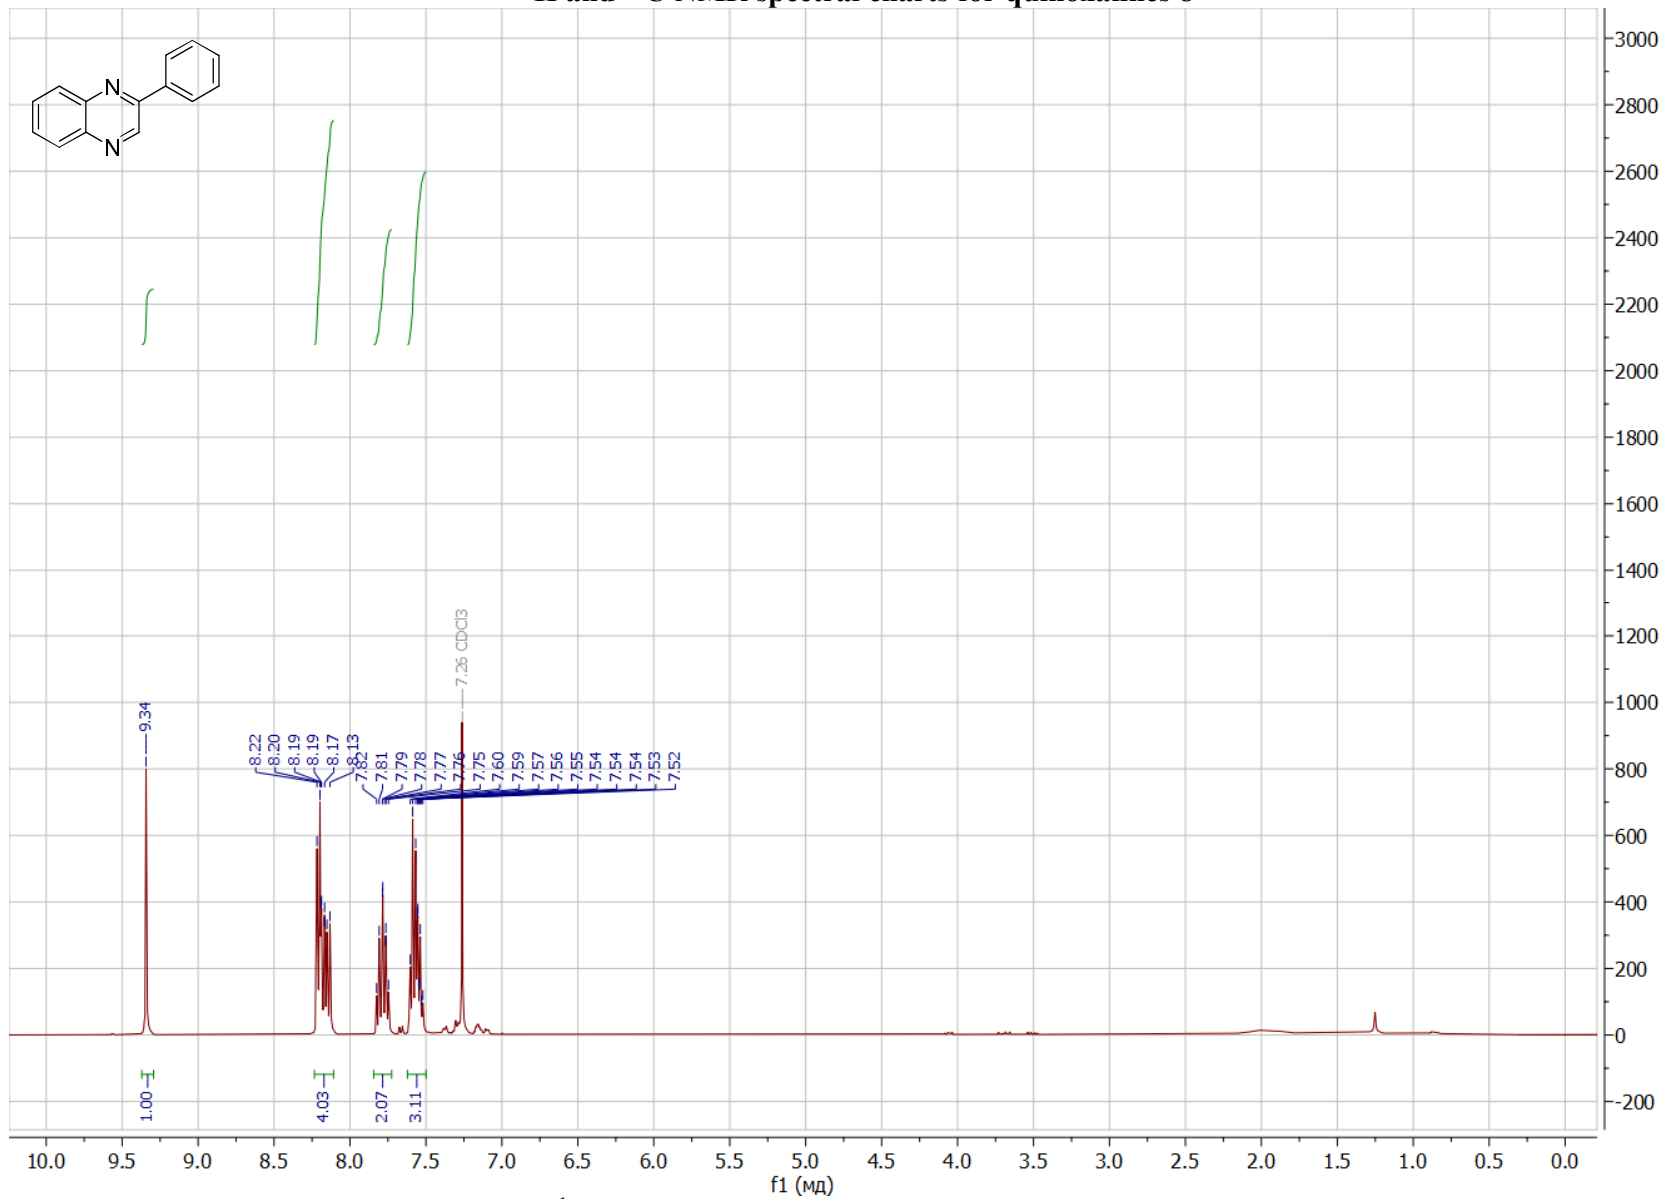

Figure S3. <sup>1</sup>H NMR spectrum of quinoxaline **8aa** in CDCl<sub>3</sub> (400 MHz)

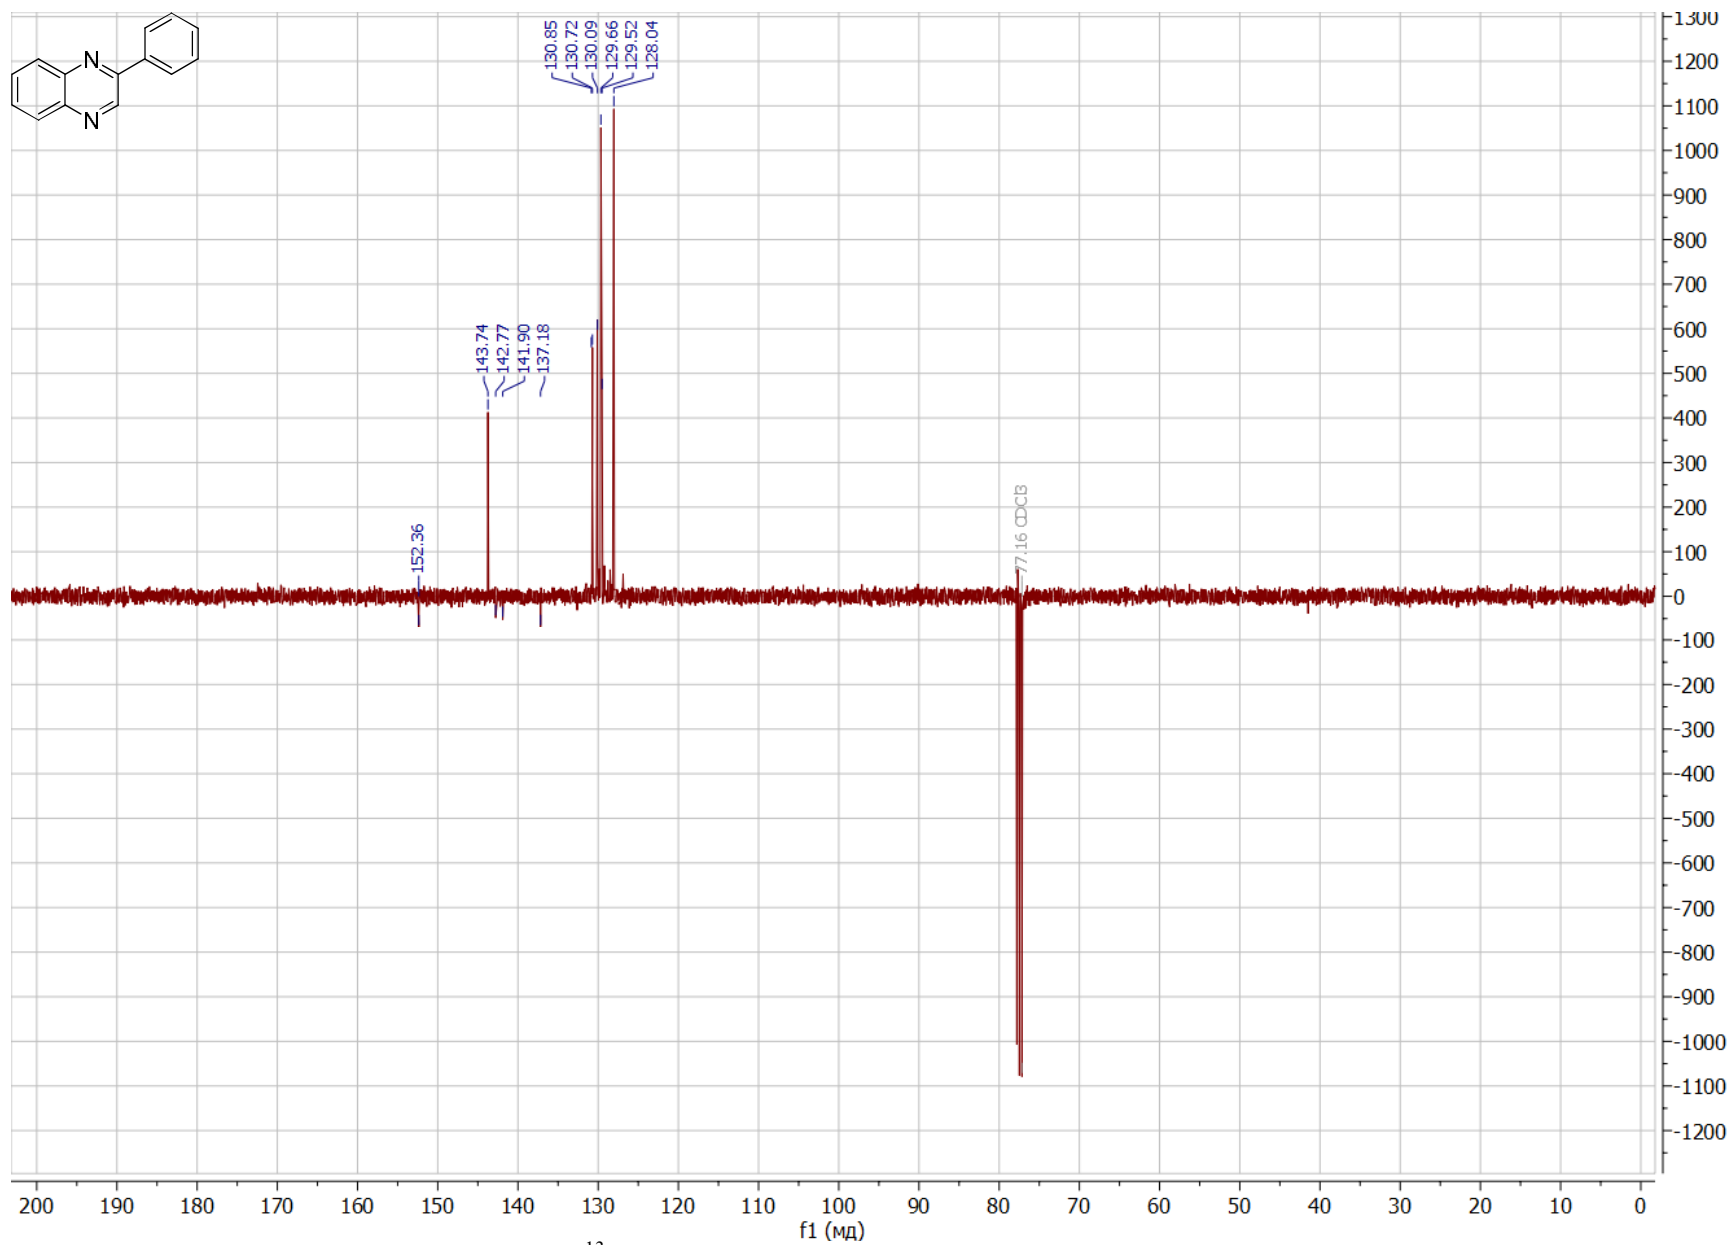

Figure S4.  $^{13}\text{C}$  NMR spectrum of quinoxaline **8aa** in  $\text{CDCl}_3$  (101 MHz)

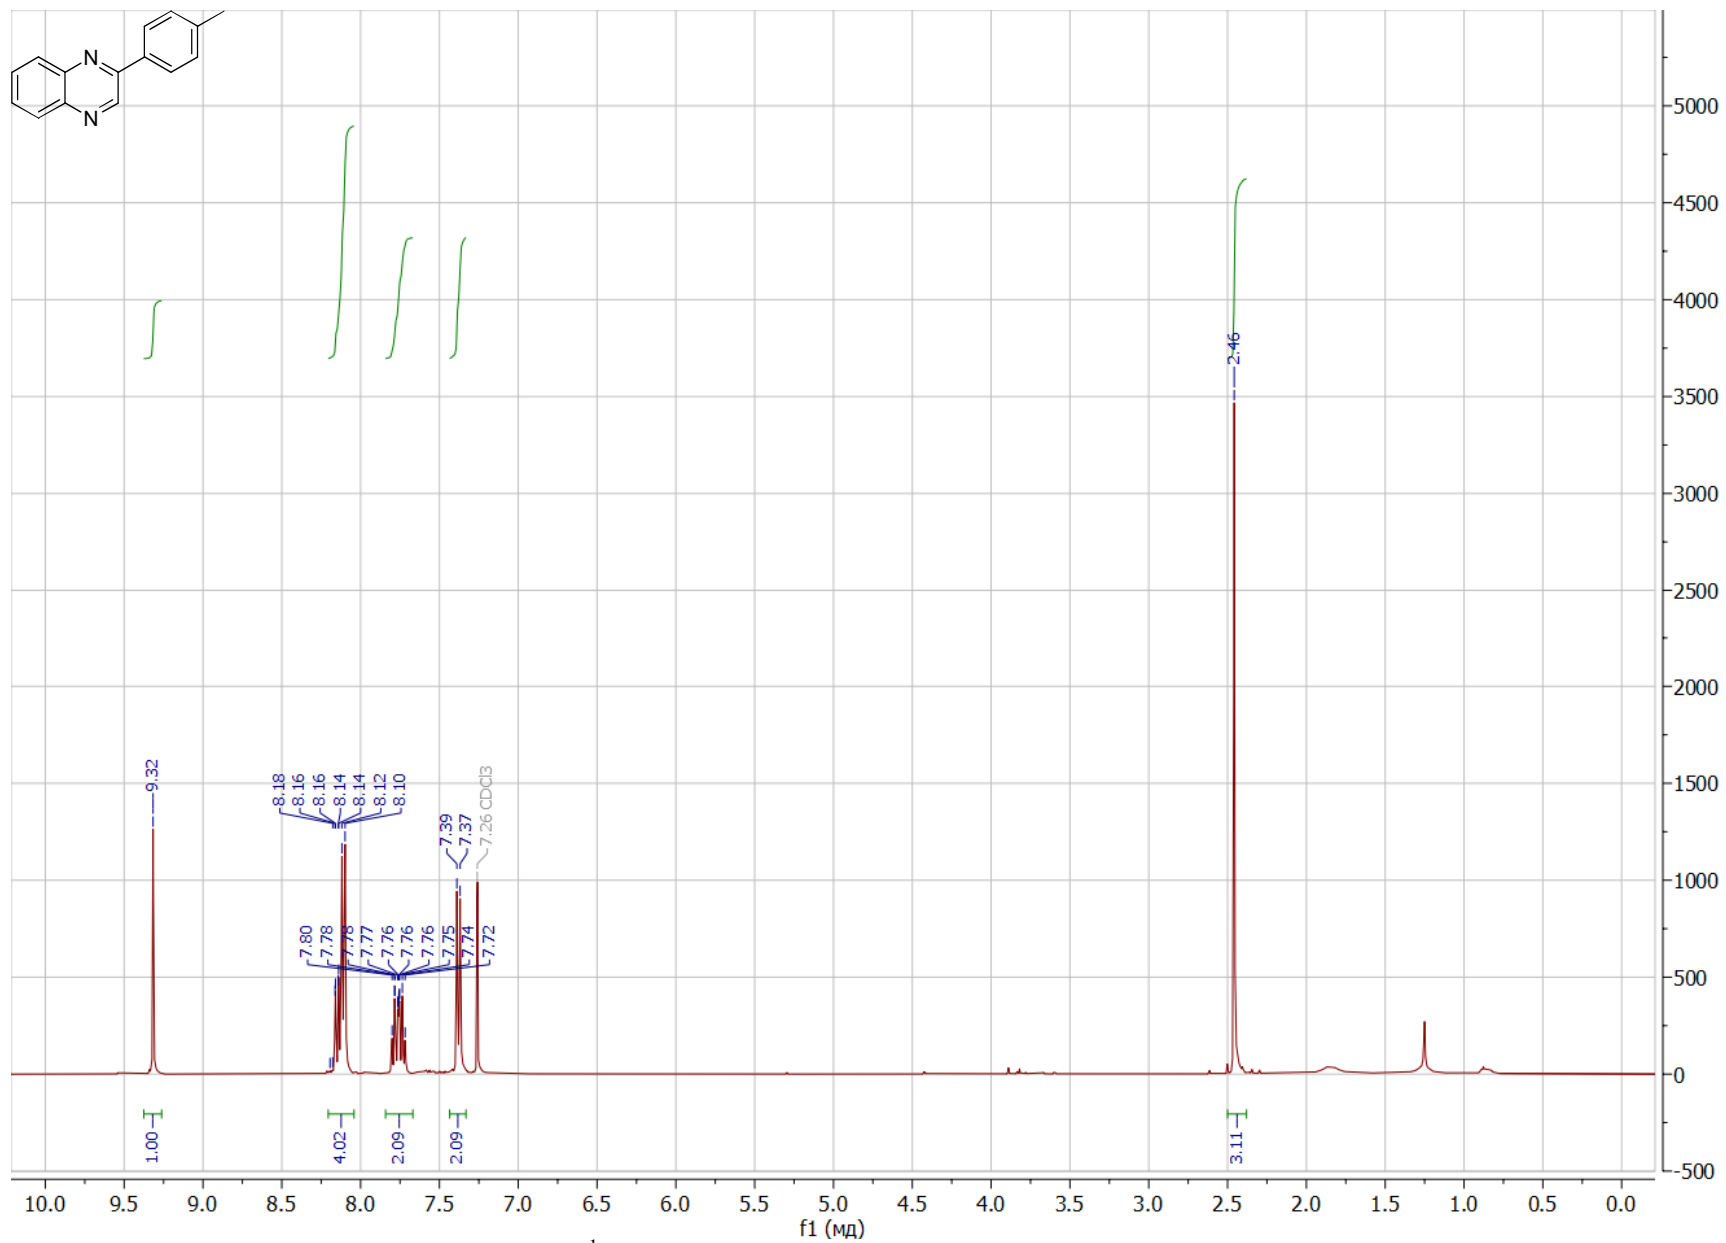

Figure S5. <sup>1</sup>H NMR spectrum of quinoxaline **8ba** in CDCl<sub>3</sub> (400 MHz)

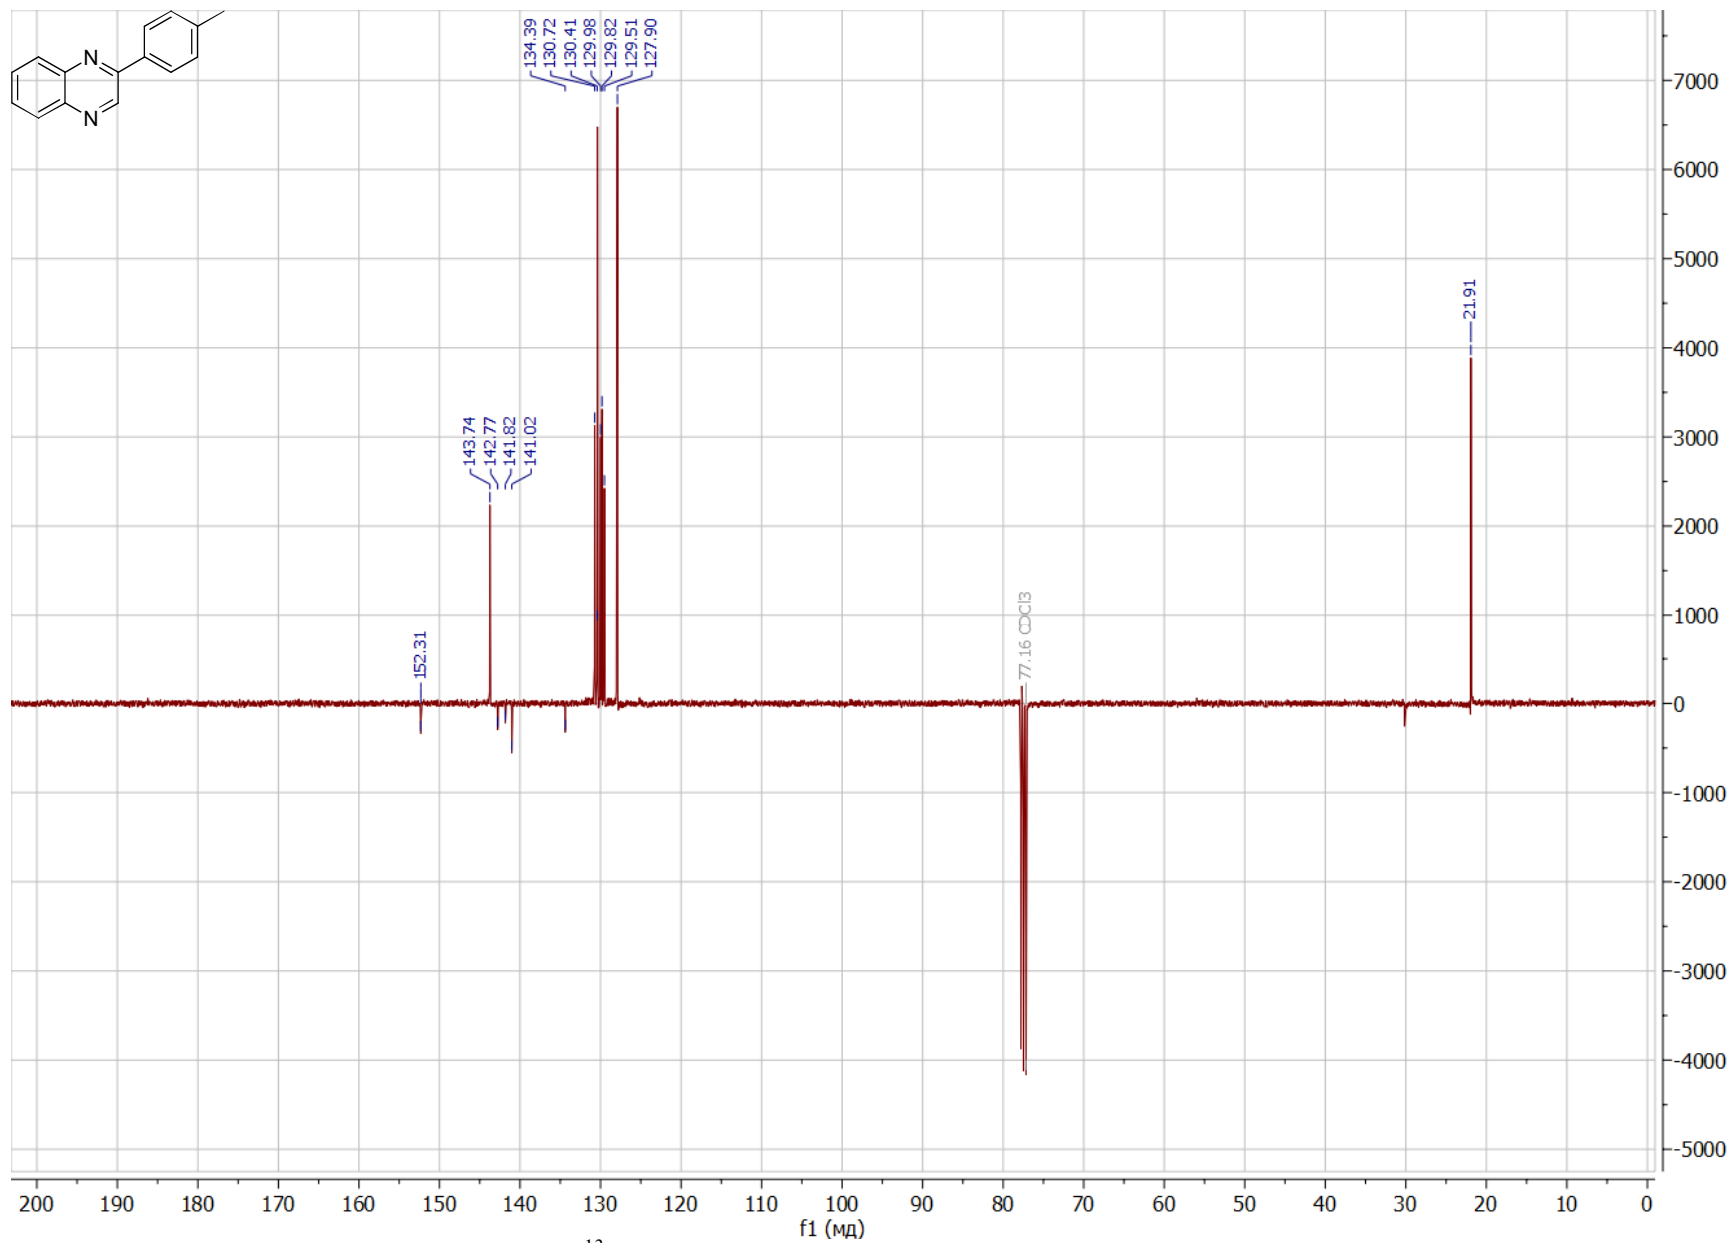

Figure S6.  $^{13}\text{C}$  NMR spectrum of quinoxaline **8ba** in  $\text{CDCl}_3$  (101 MHz)

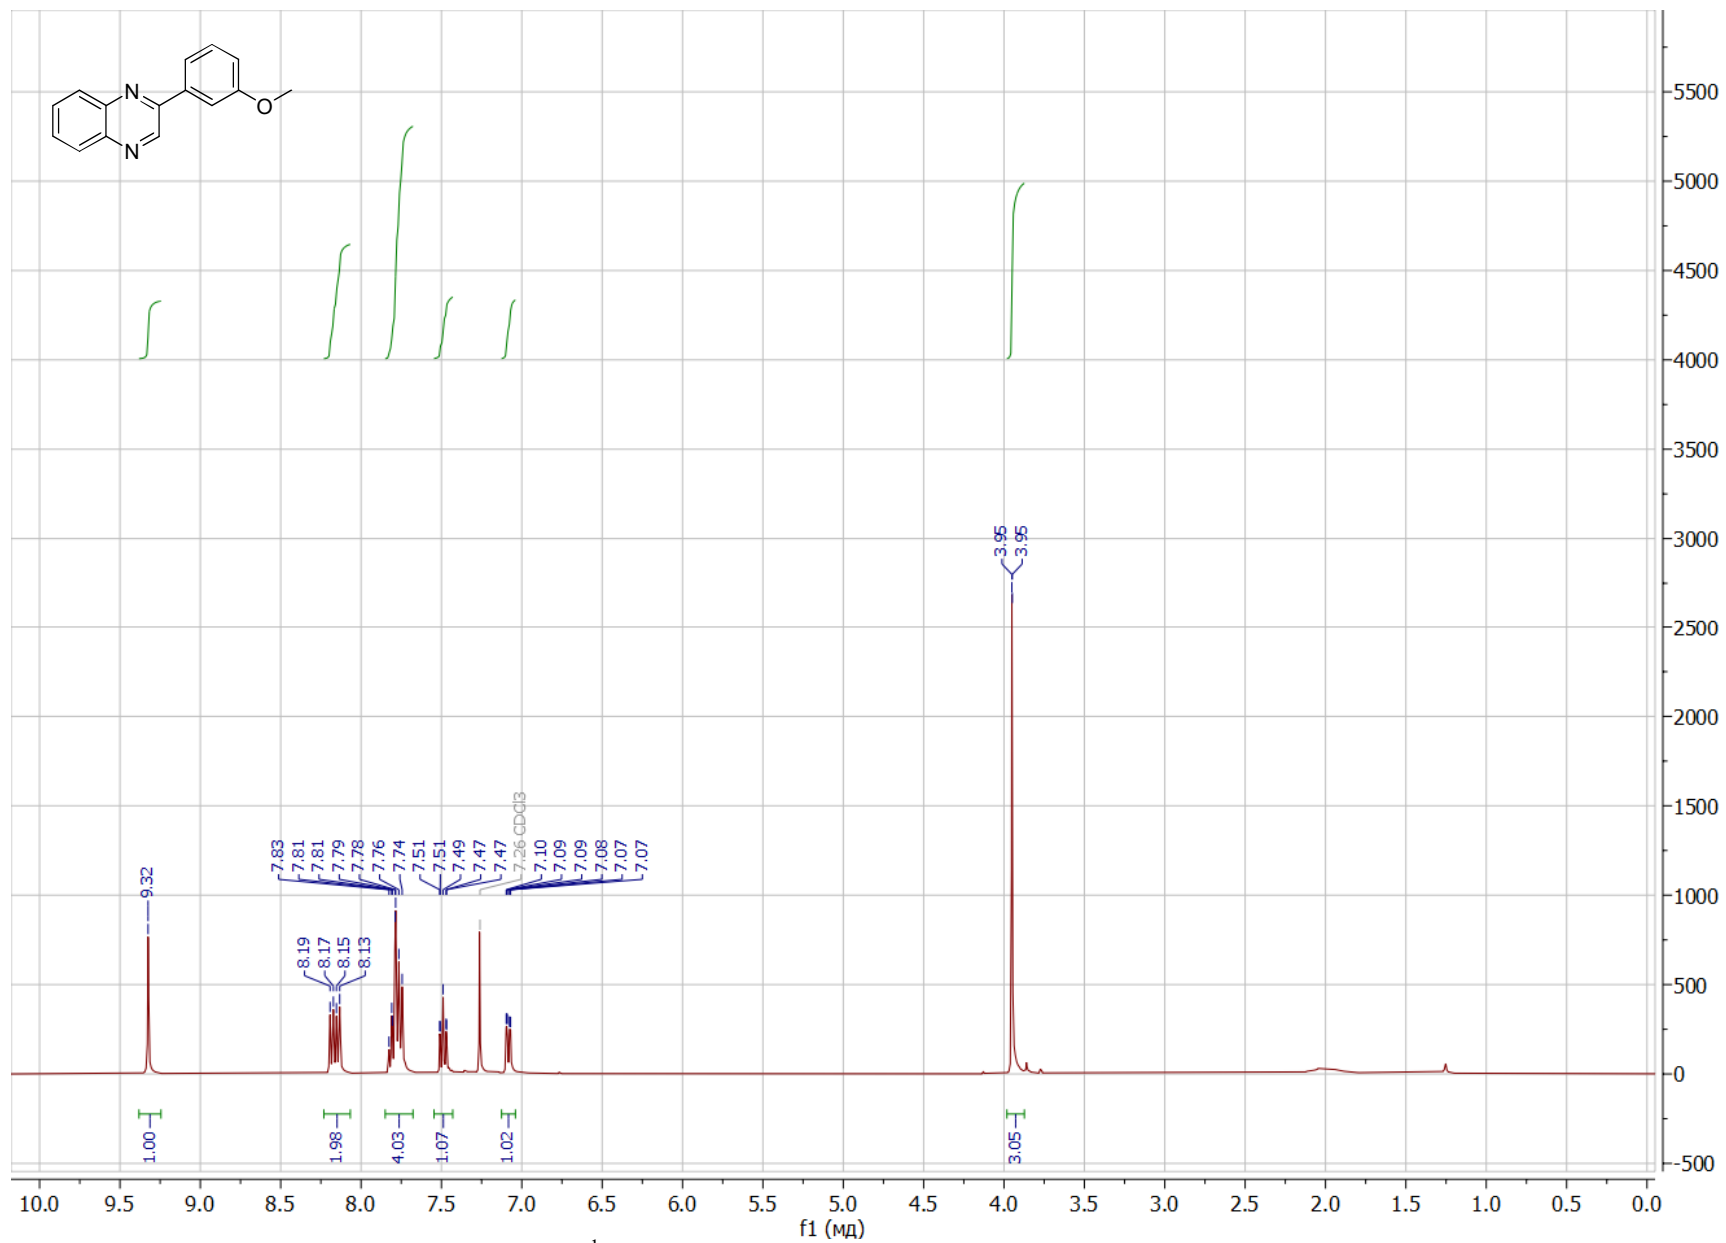

Figure S7. <sup>1</sup>H NMR spectrum of quinoxaline **8ca** in CDCl<sub>3</sub> (400 MHz)



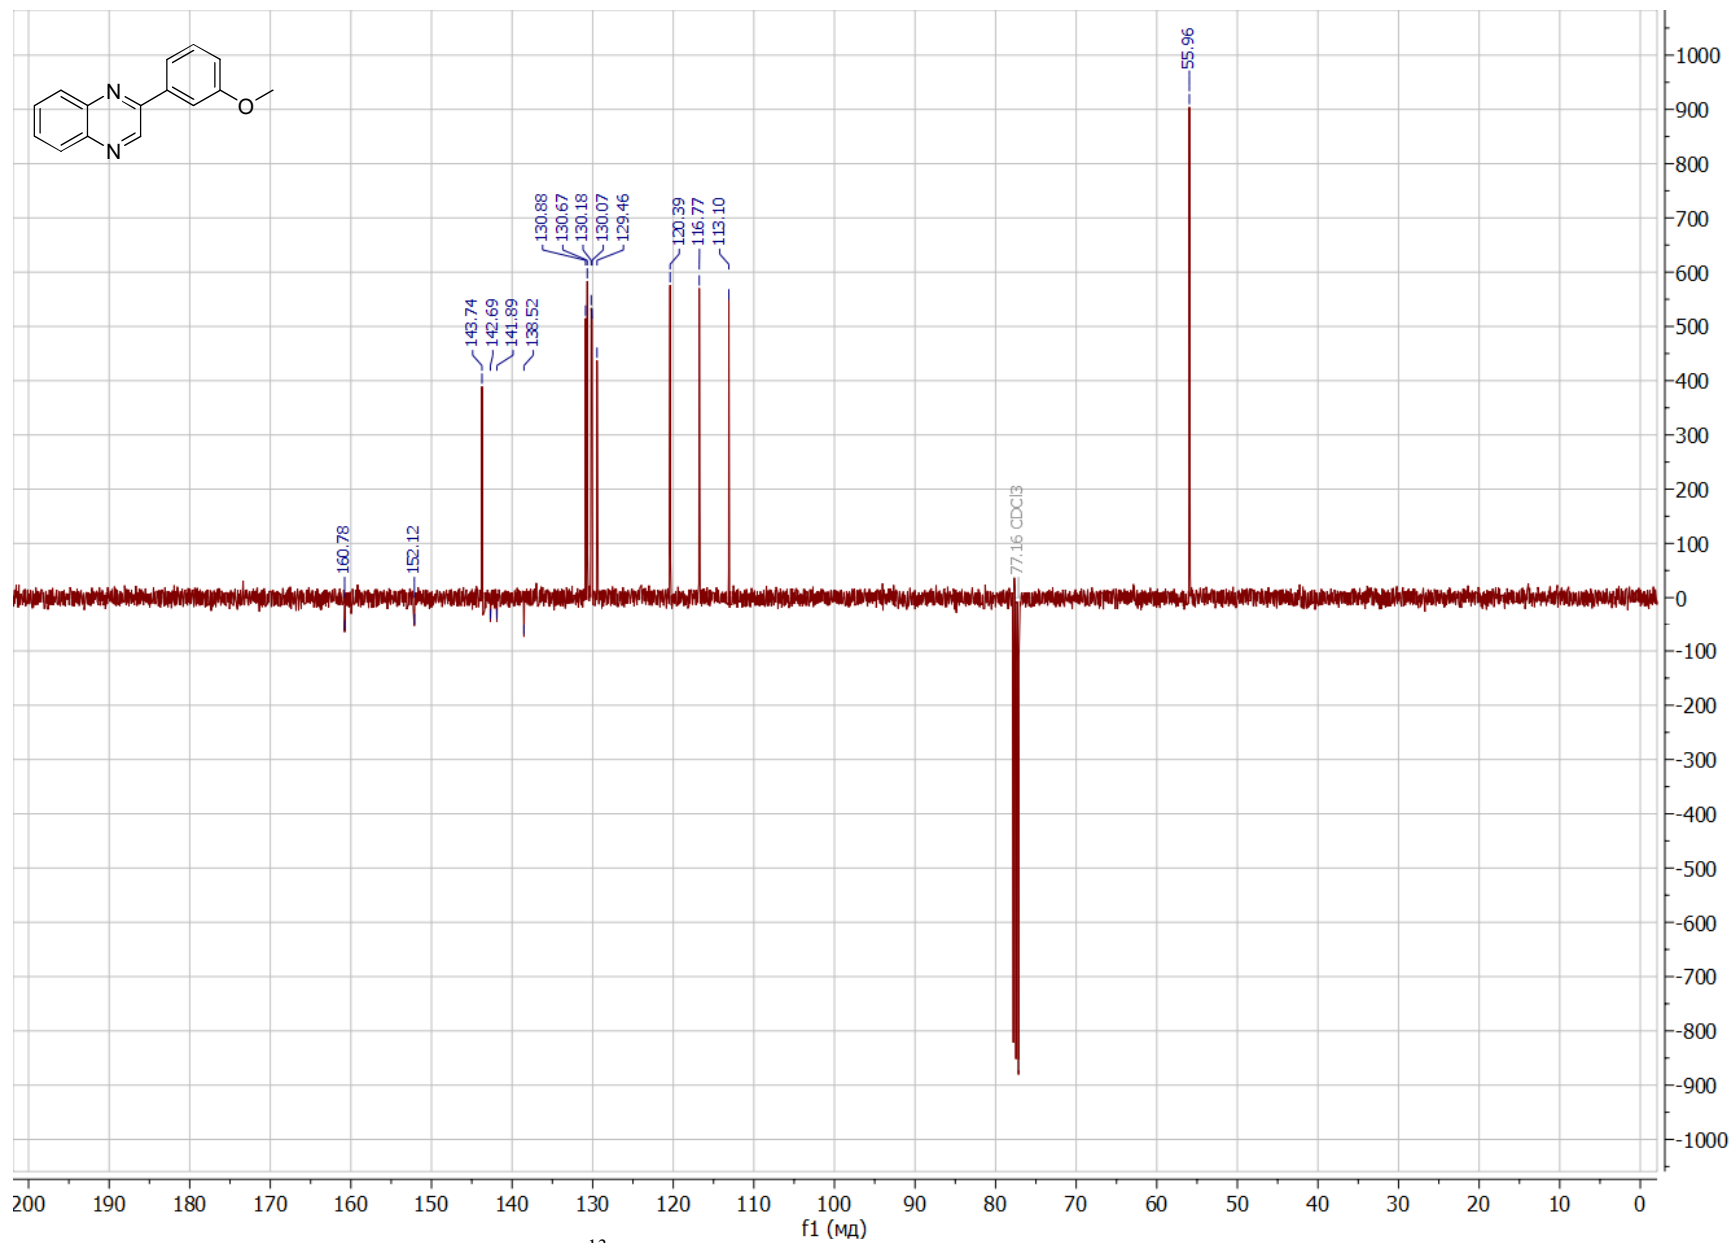

Figure S8.  $^{13}\text{C}$  NMR spectrum of quinoxaline **8ca** in  $\text{CDCl}_3$  (101 MHz)

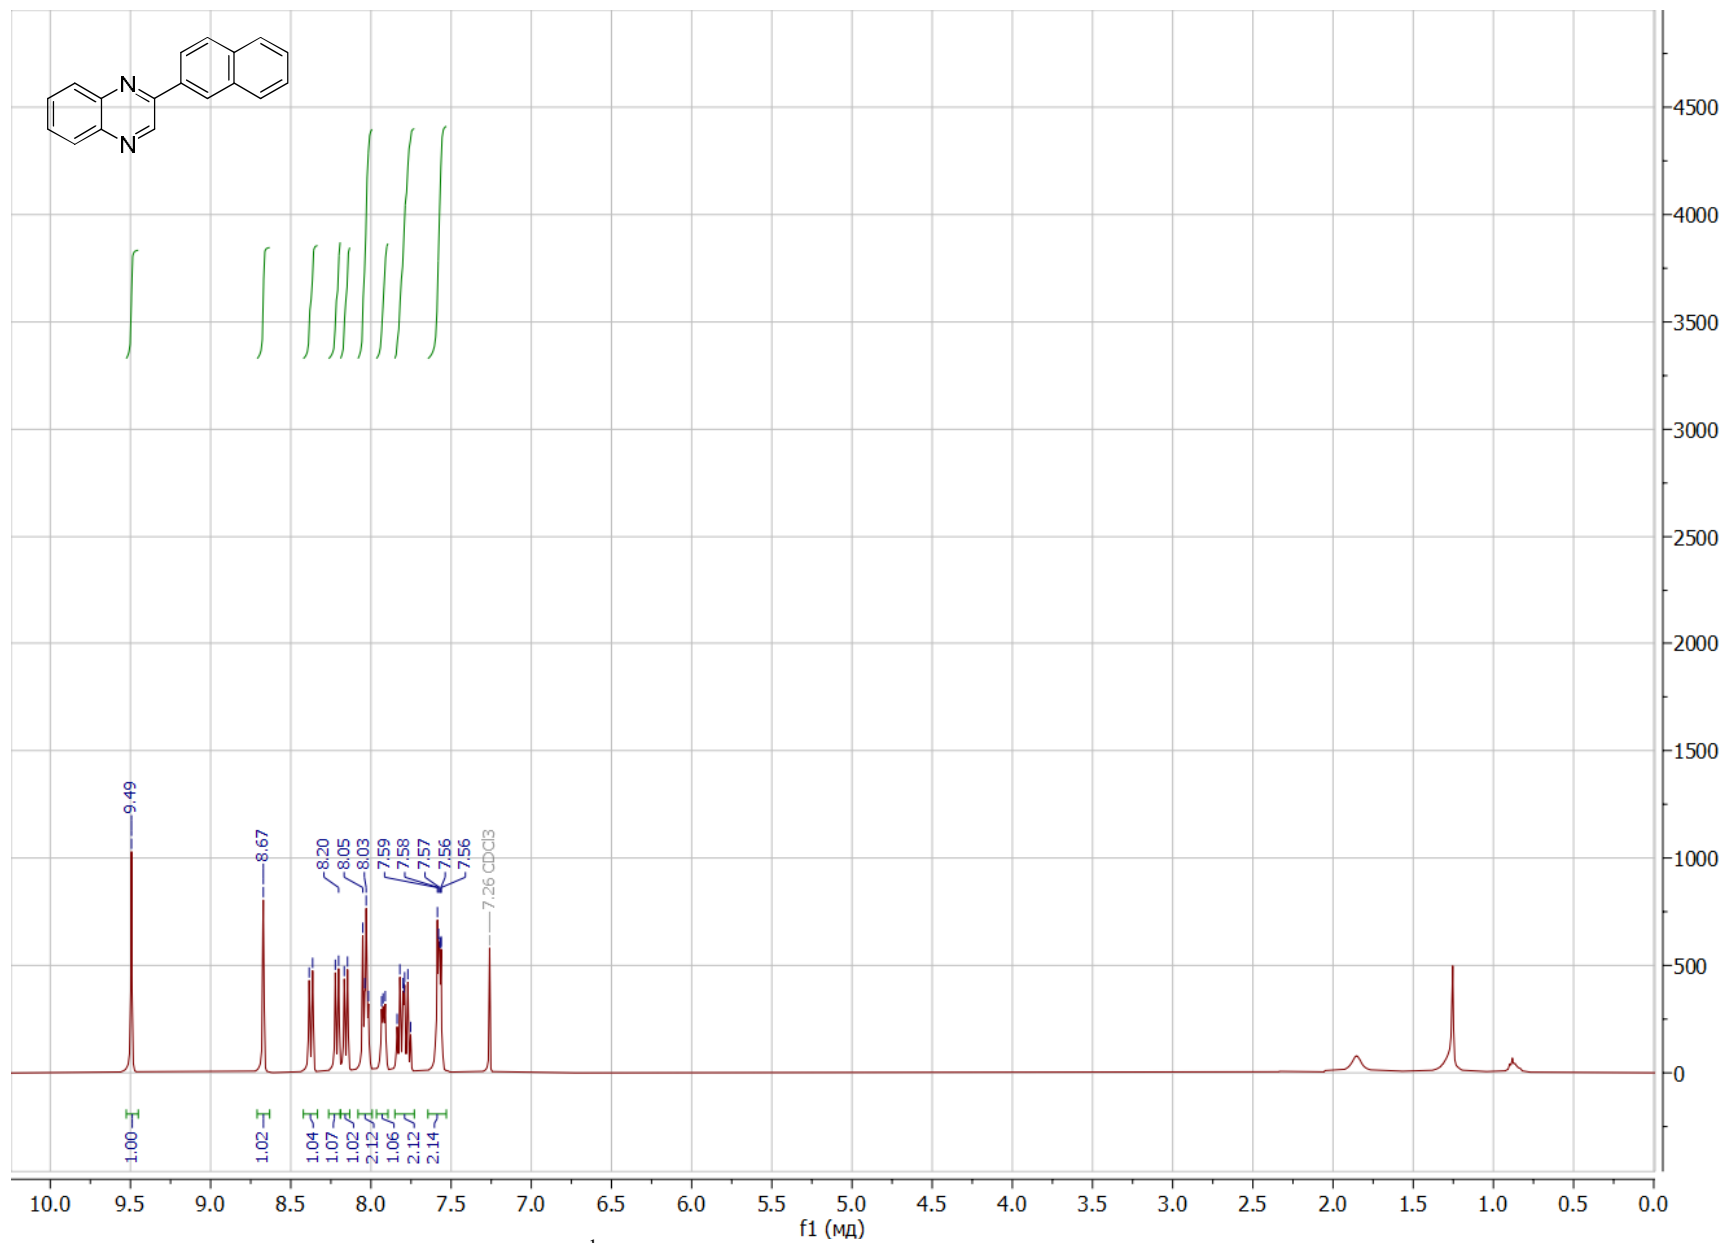

Figure S9. <sup>1</sup>H NMR spectrum of quinoxaline **8da** in CDCl<sub>3</sub> (400 MHz)

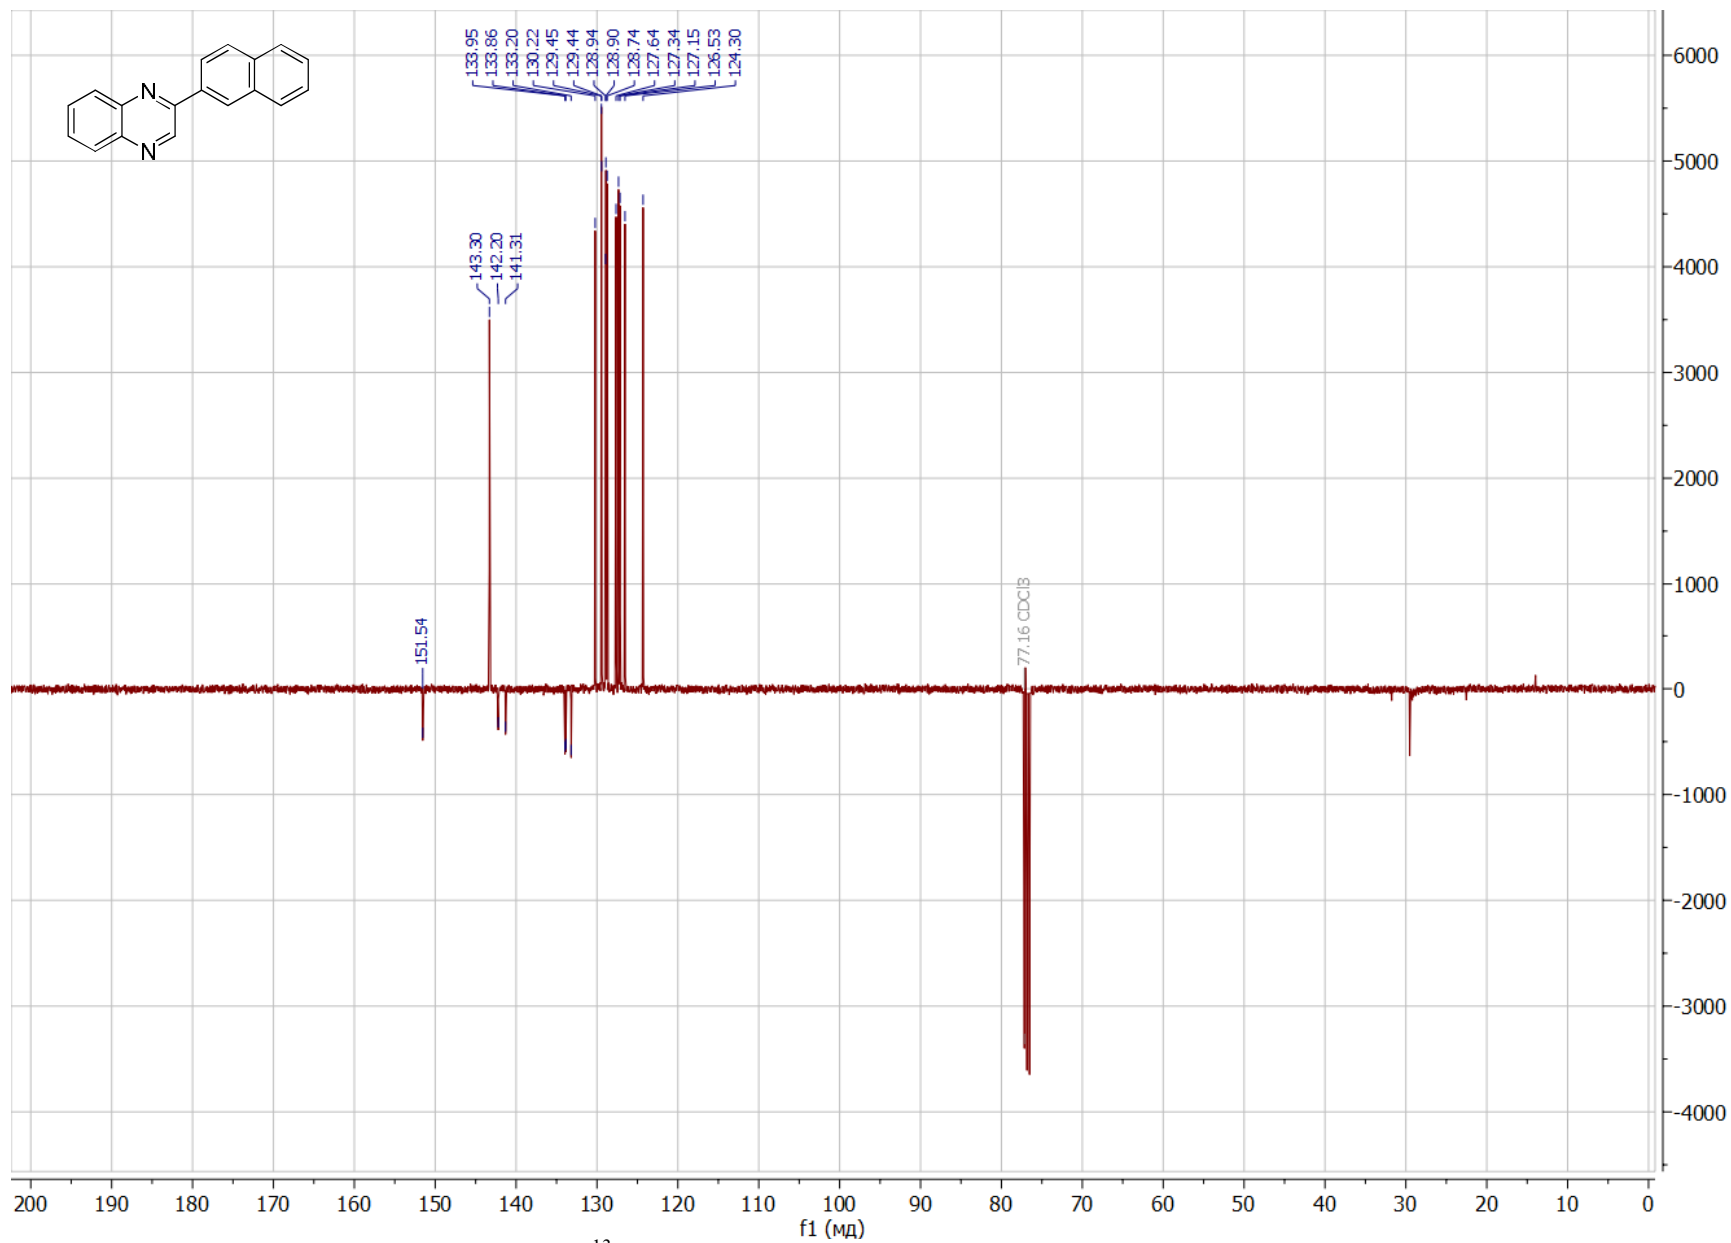

Figure S10.  $^{13}\text{C}$  NMR spectrum of quinoxaline **8da** in  $\text{CDCl}_3$  (101 MHz)

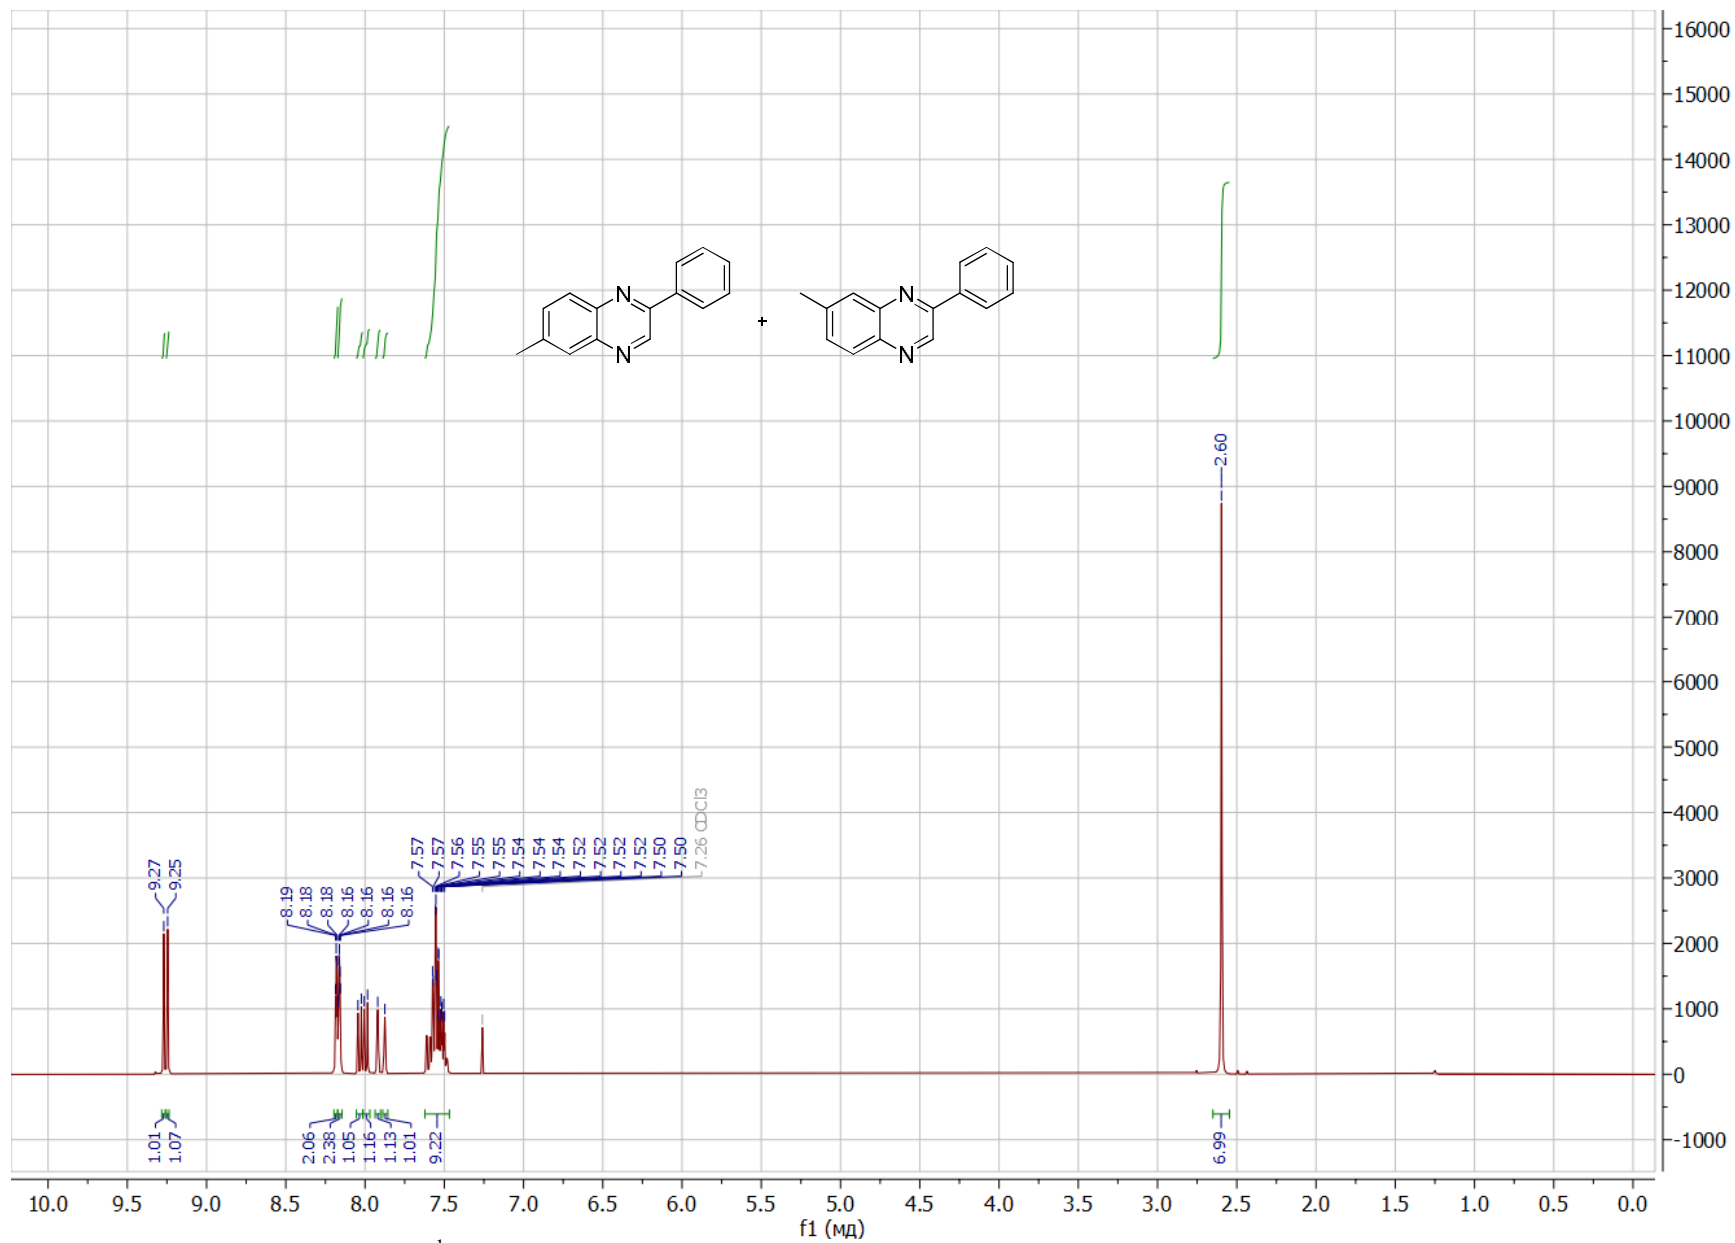

Figure S11. <sup>1</sup>H NMR spectrum of 1:1 mixture of quinoxalines **8ab'** and **8ab** in CDCl<sub>3</sub> (400 MHz)

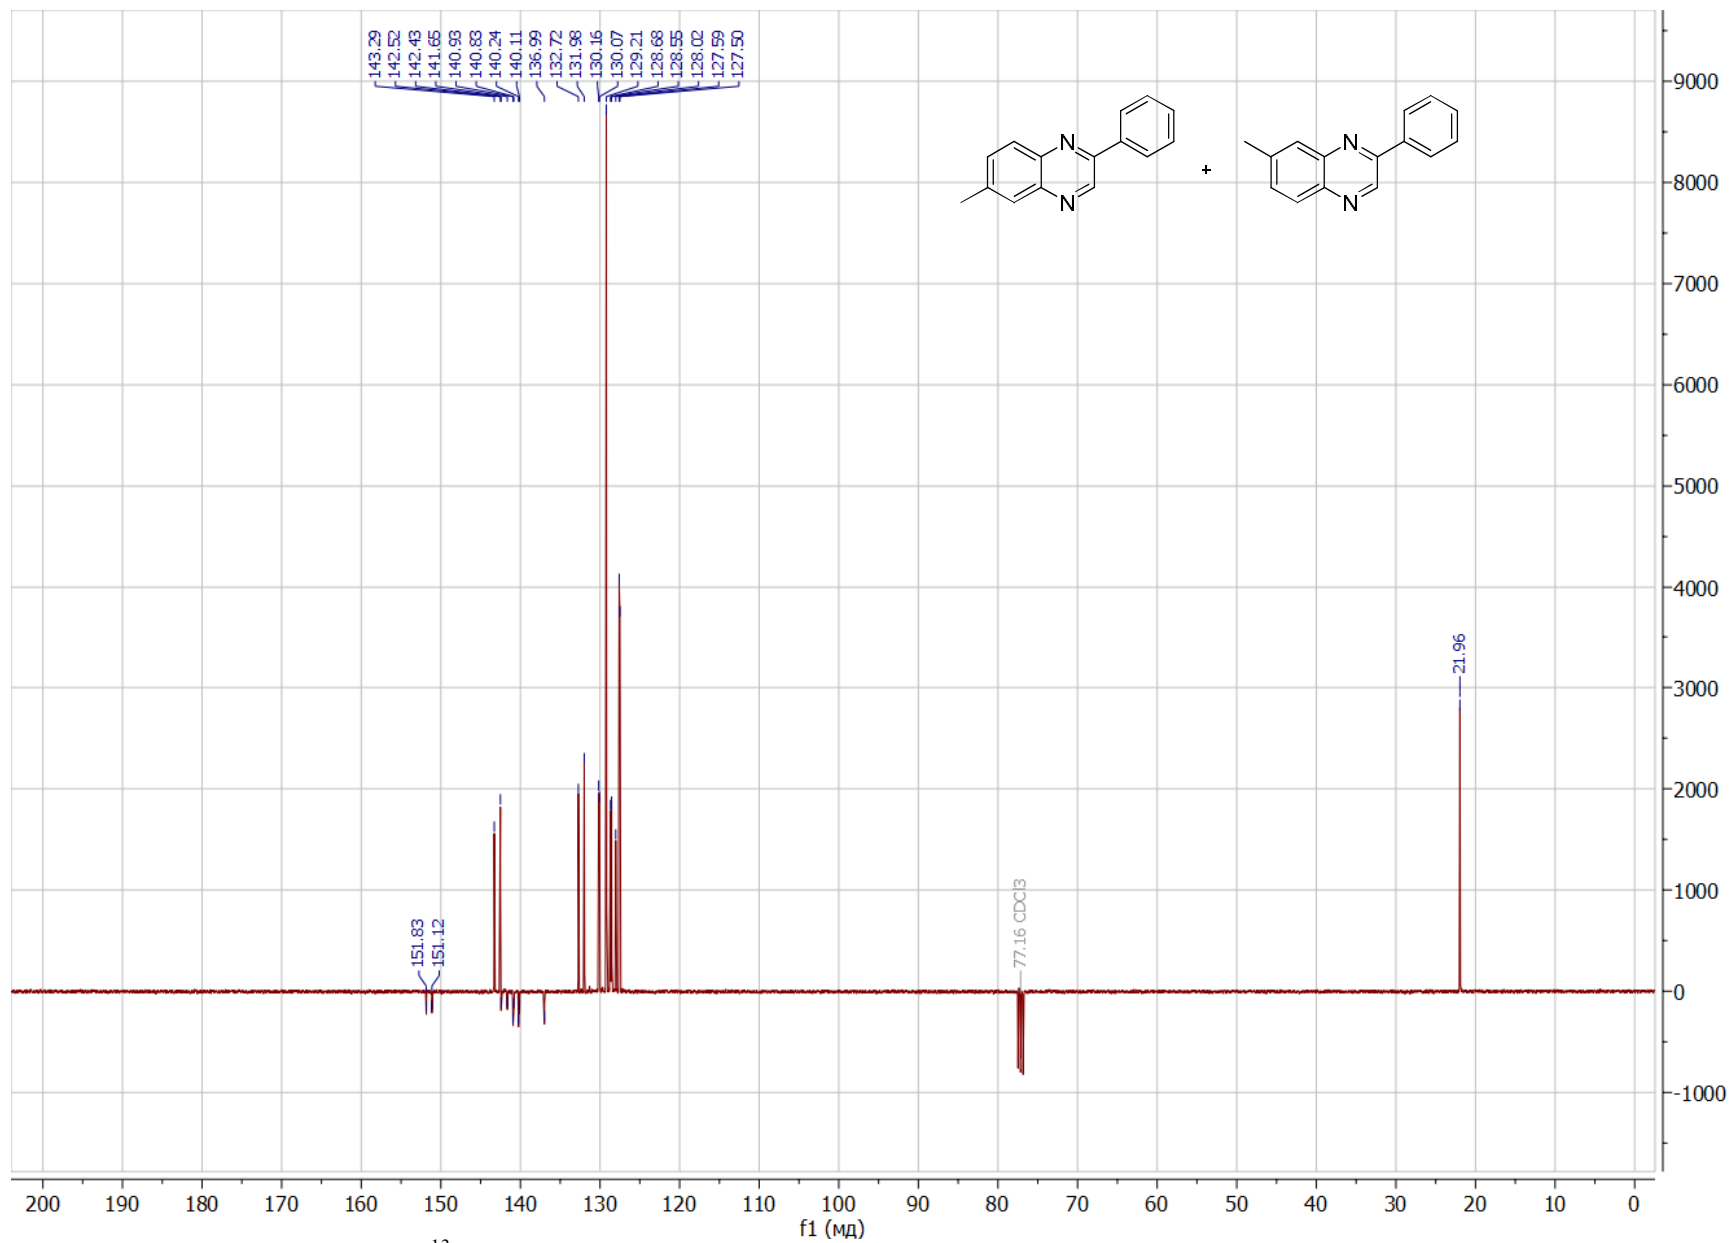

Figure S12.  $^{13}\text{C}$  NMR spectrum of 1:1 mixture of quinoxalines **8ab'** and **8ab** in  $\text{CDCl}_3$  (101 MHz)

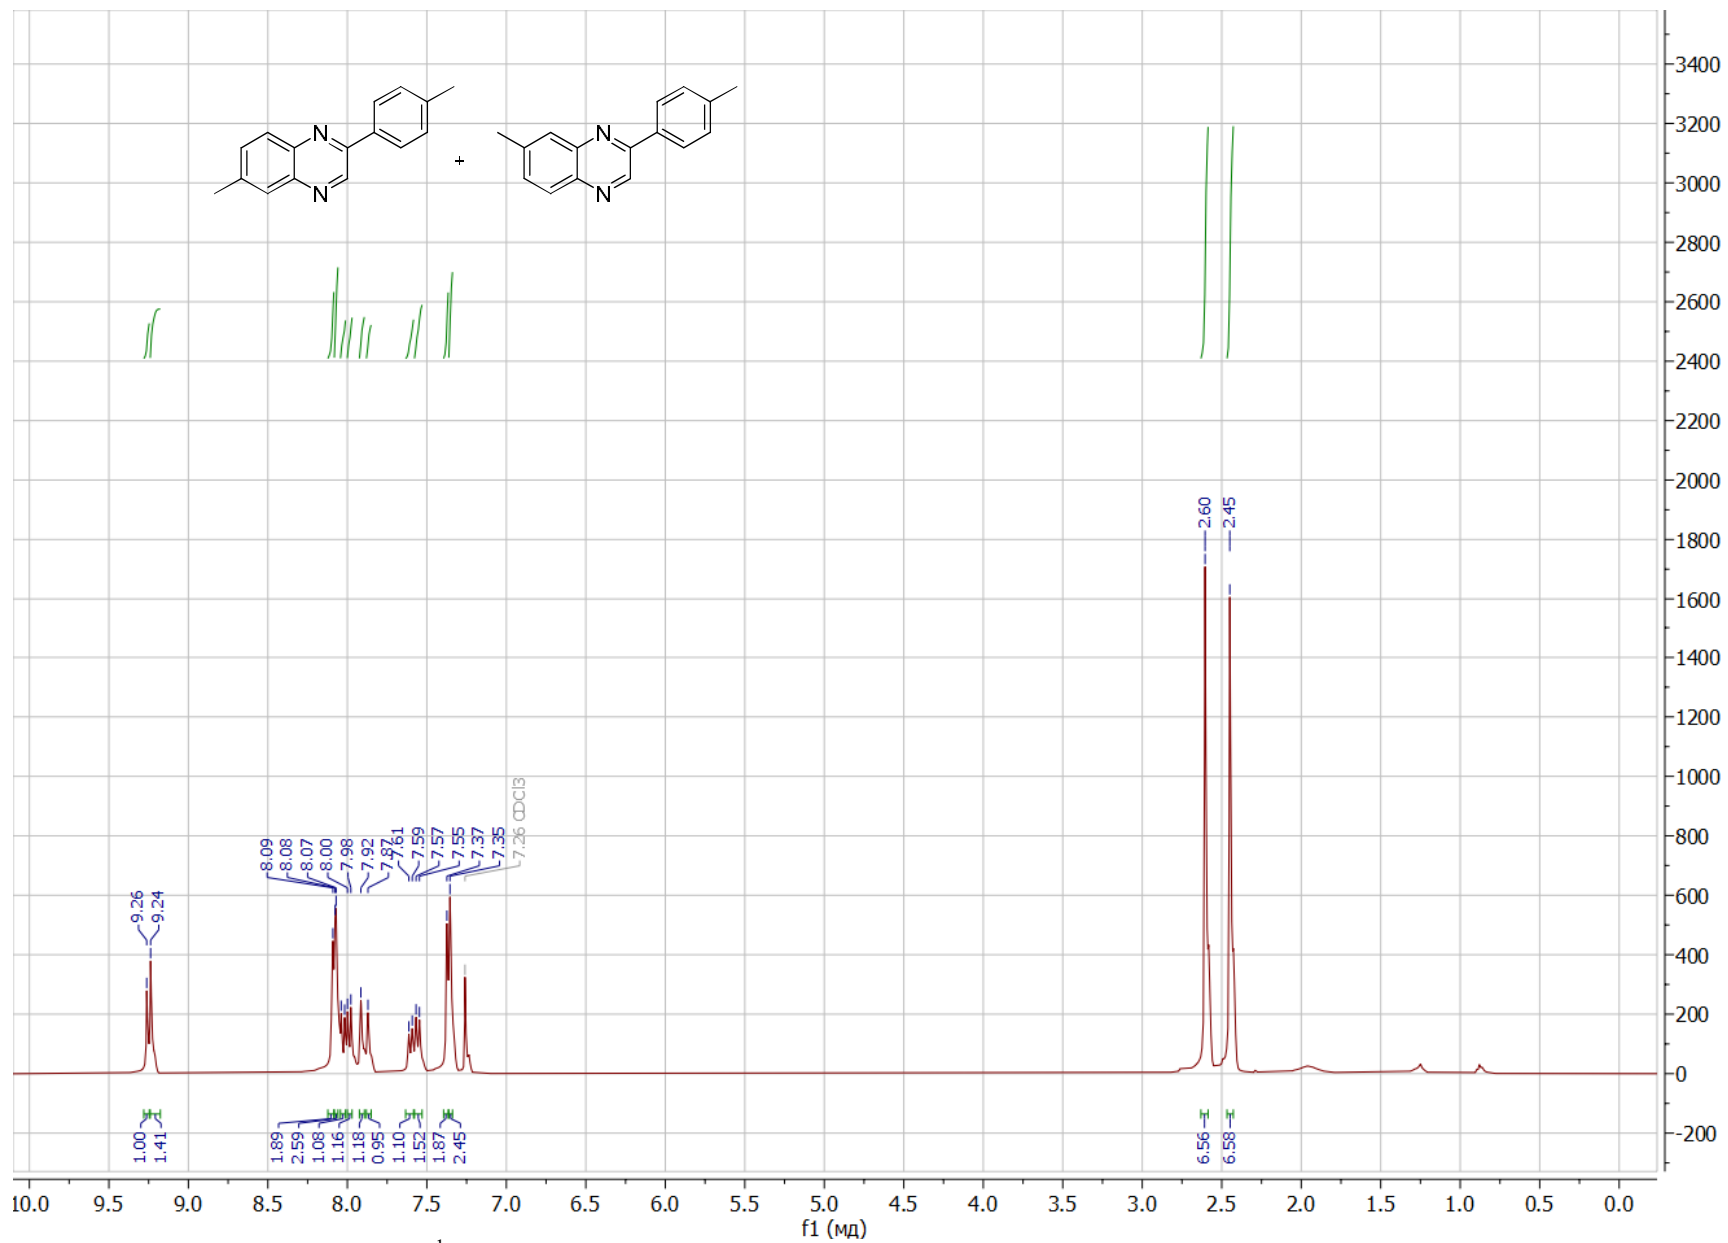

Figure S13.  $^1\text{H}$  NMR spectrum of 1:1 mixture of quinoxalines **8bb'** and **8bb** in  $\text{CDCl}_3$  (400 MHz)

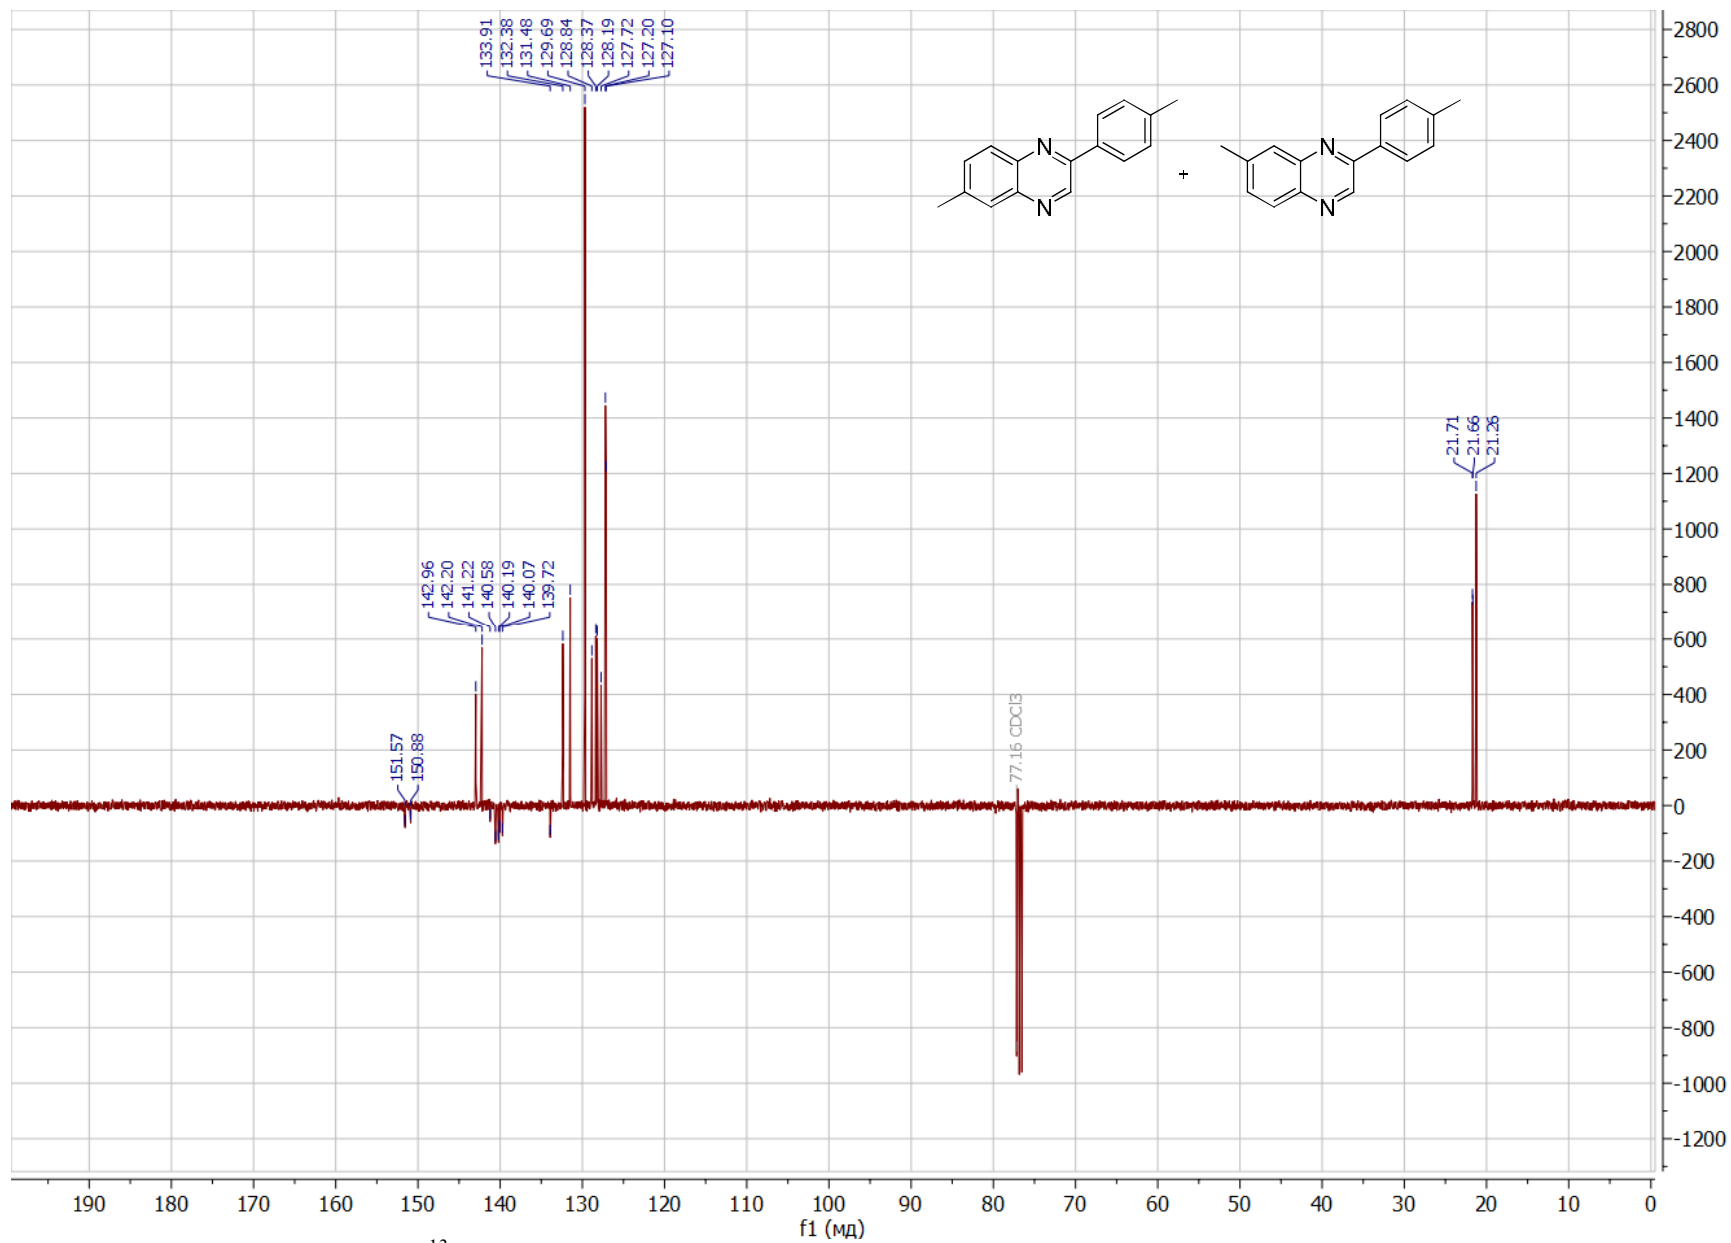

Figure S14.  $^{13}\text{C}$  NMR spectrum of 1:1 mixture of quinoxalines **8bb'** and **8bb** in  $\text{CDCl}_3$  (101 MHz)

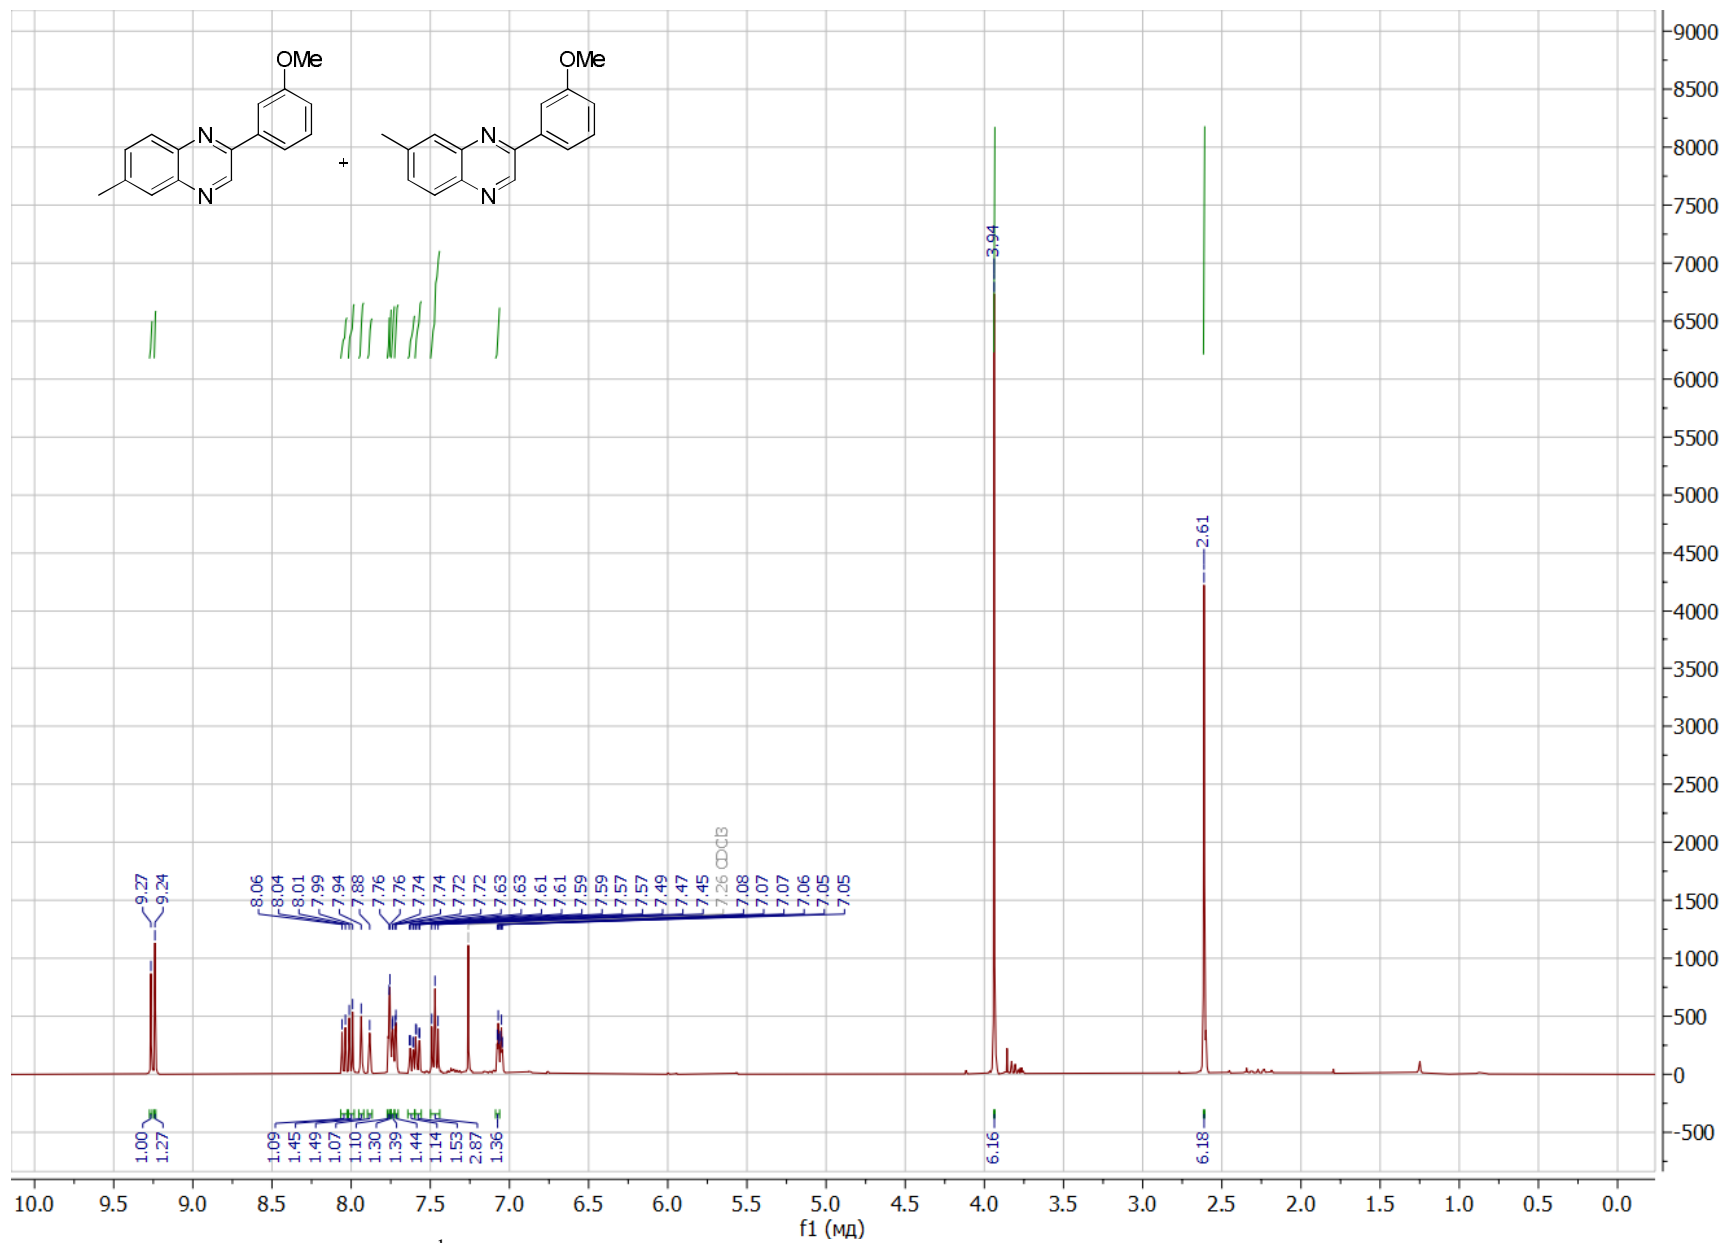

Figure S15.  $^1\text{H}$  NMR spectrum of 1:1 mixture of quinoxalines **8cb'** and **8cb** in  $\text{CDCl}_3$  (400 MHz)



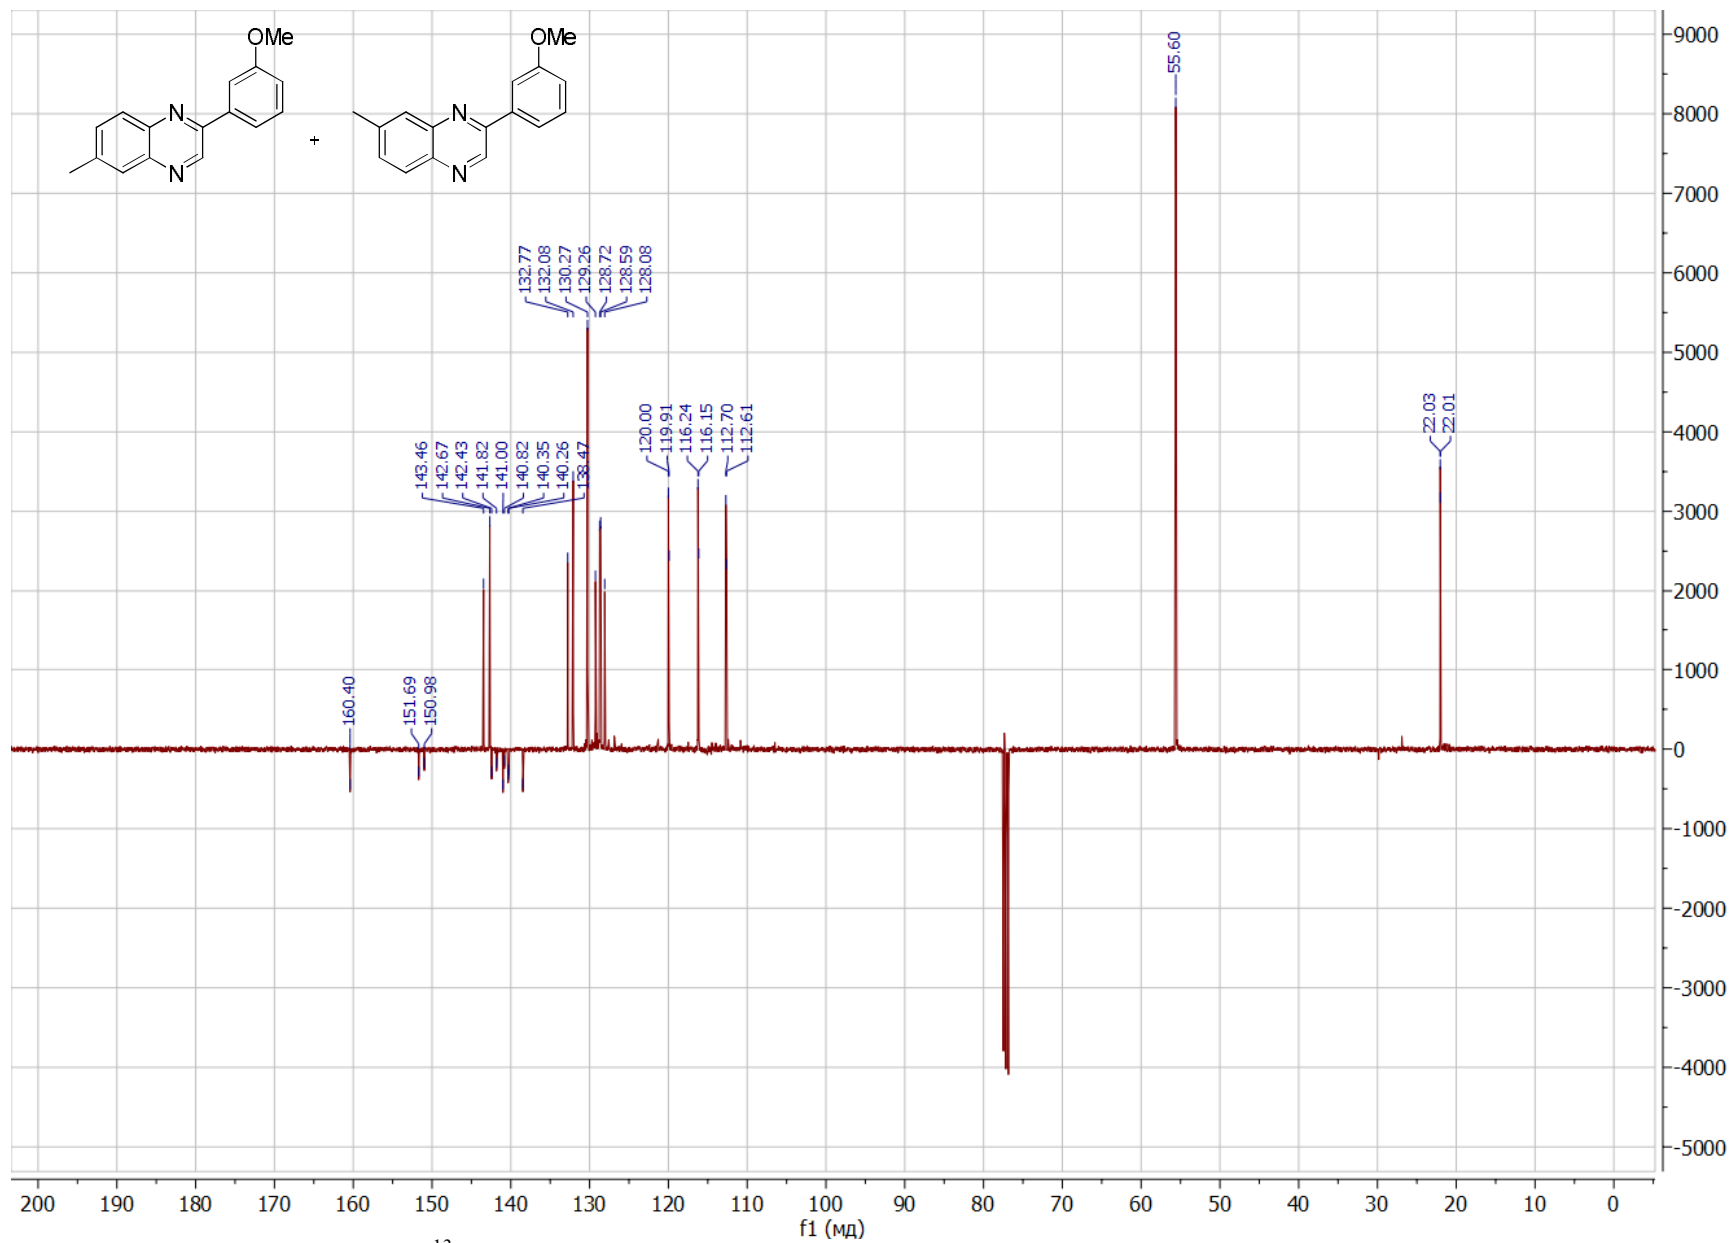

Figure S16.  $^{13}\text{C}$  NMR spectrum of 1:1 mixture of quinoxalines **8cb'** and **8cb** in  $\text{CDCl}_3$  (101 MHz)

**<sup>1</sup>H and <sup>13</sup>C NMR spectral charts for imidazopyridines 10**

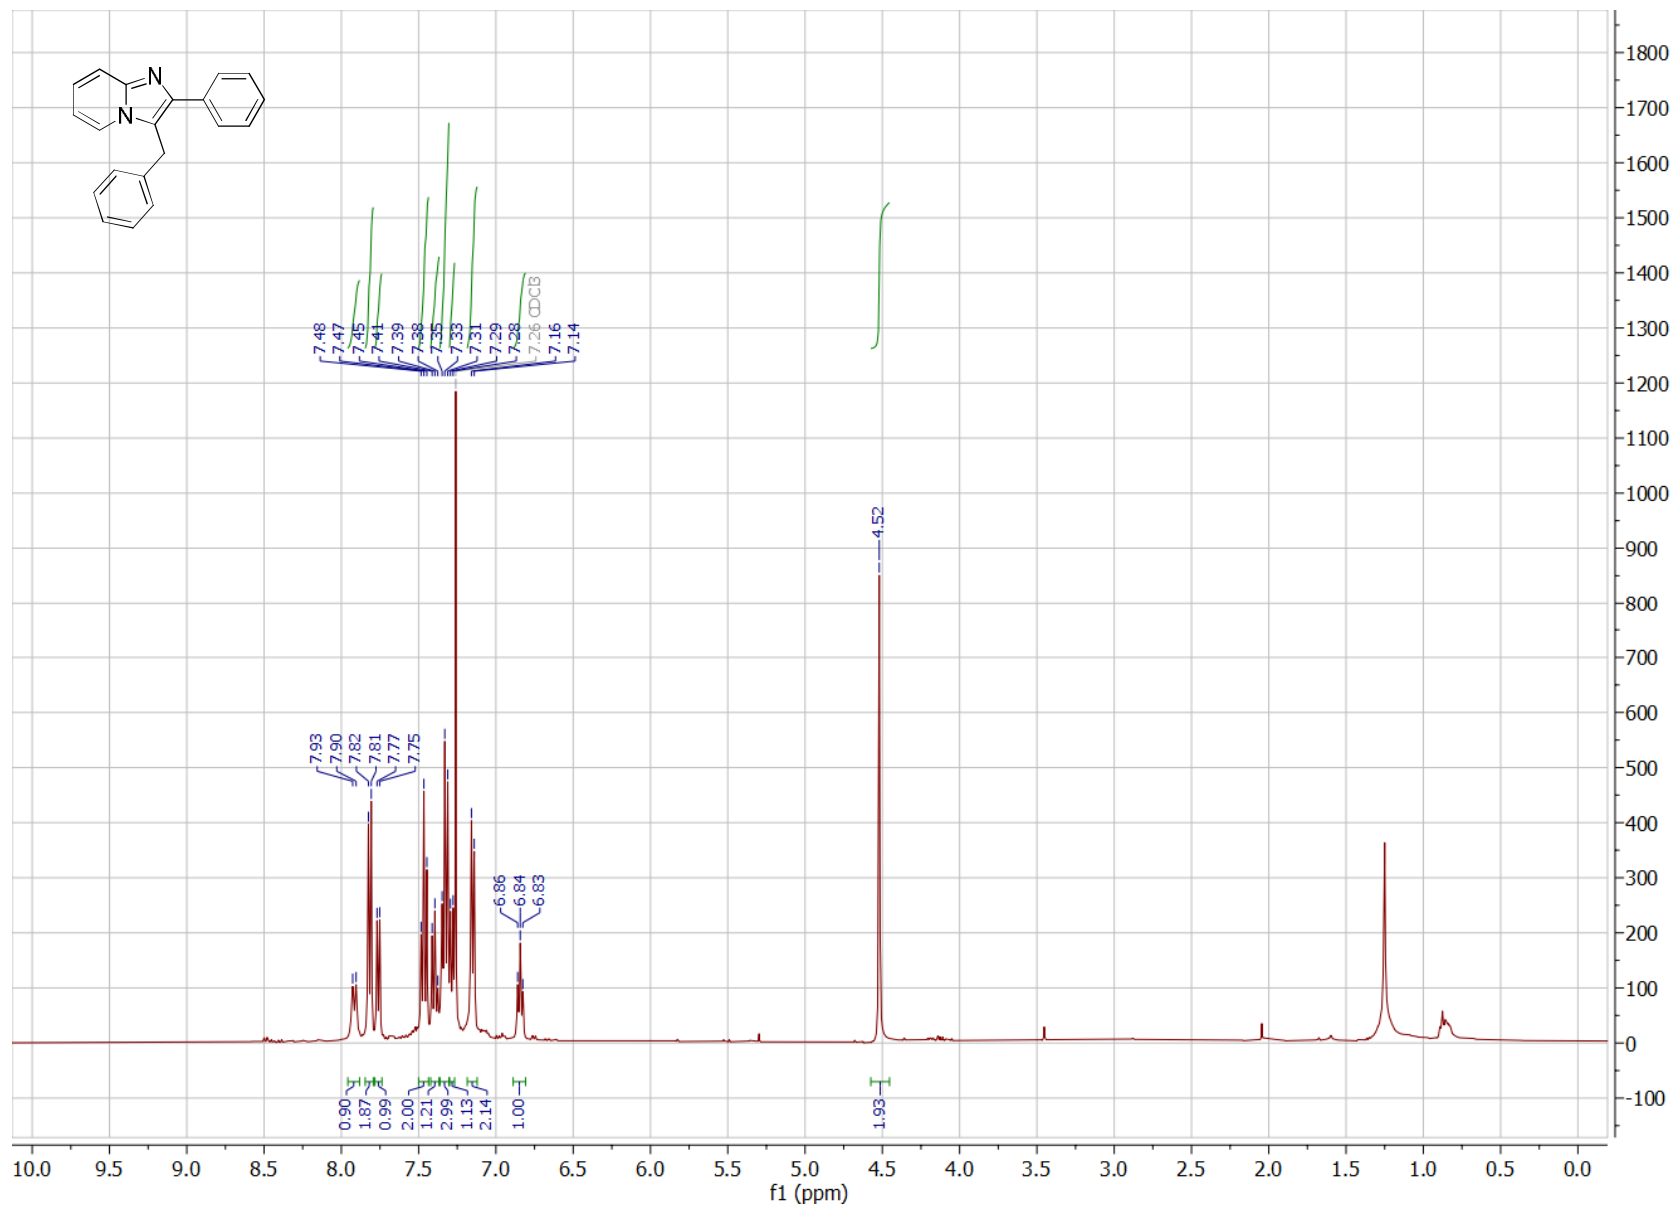

Figure S17. <sup>1</sup>H NMR spectrum of imidazo[1,2-a]pyridine **10aaa** in CDCl<sub>3</sub> (400 MHz)

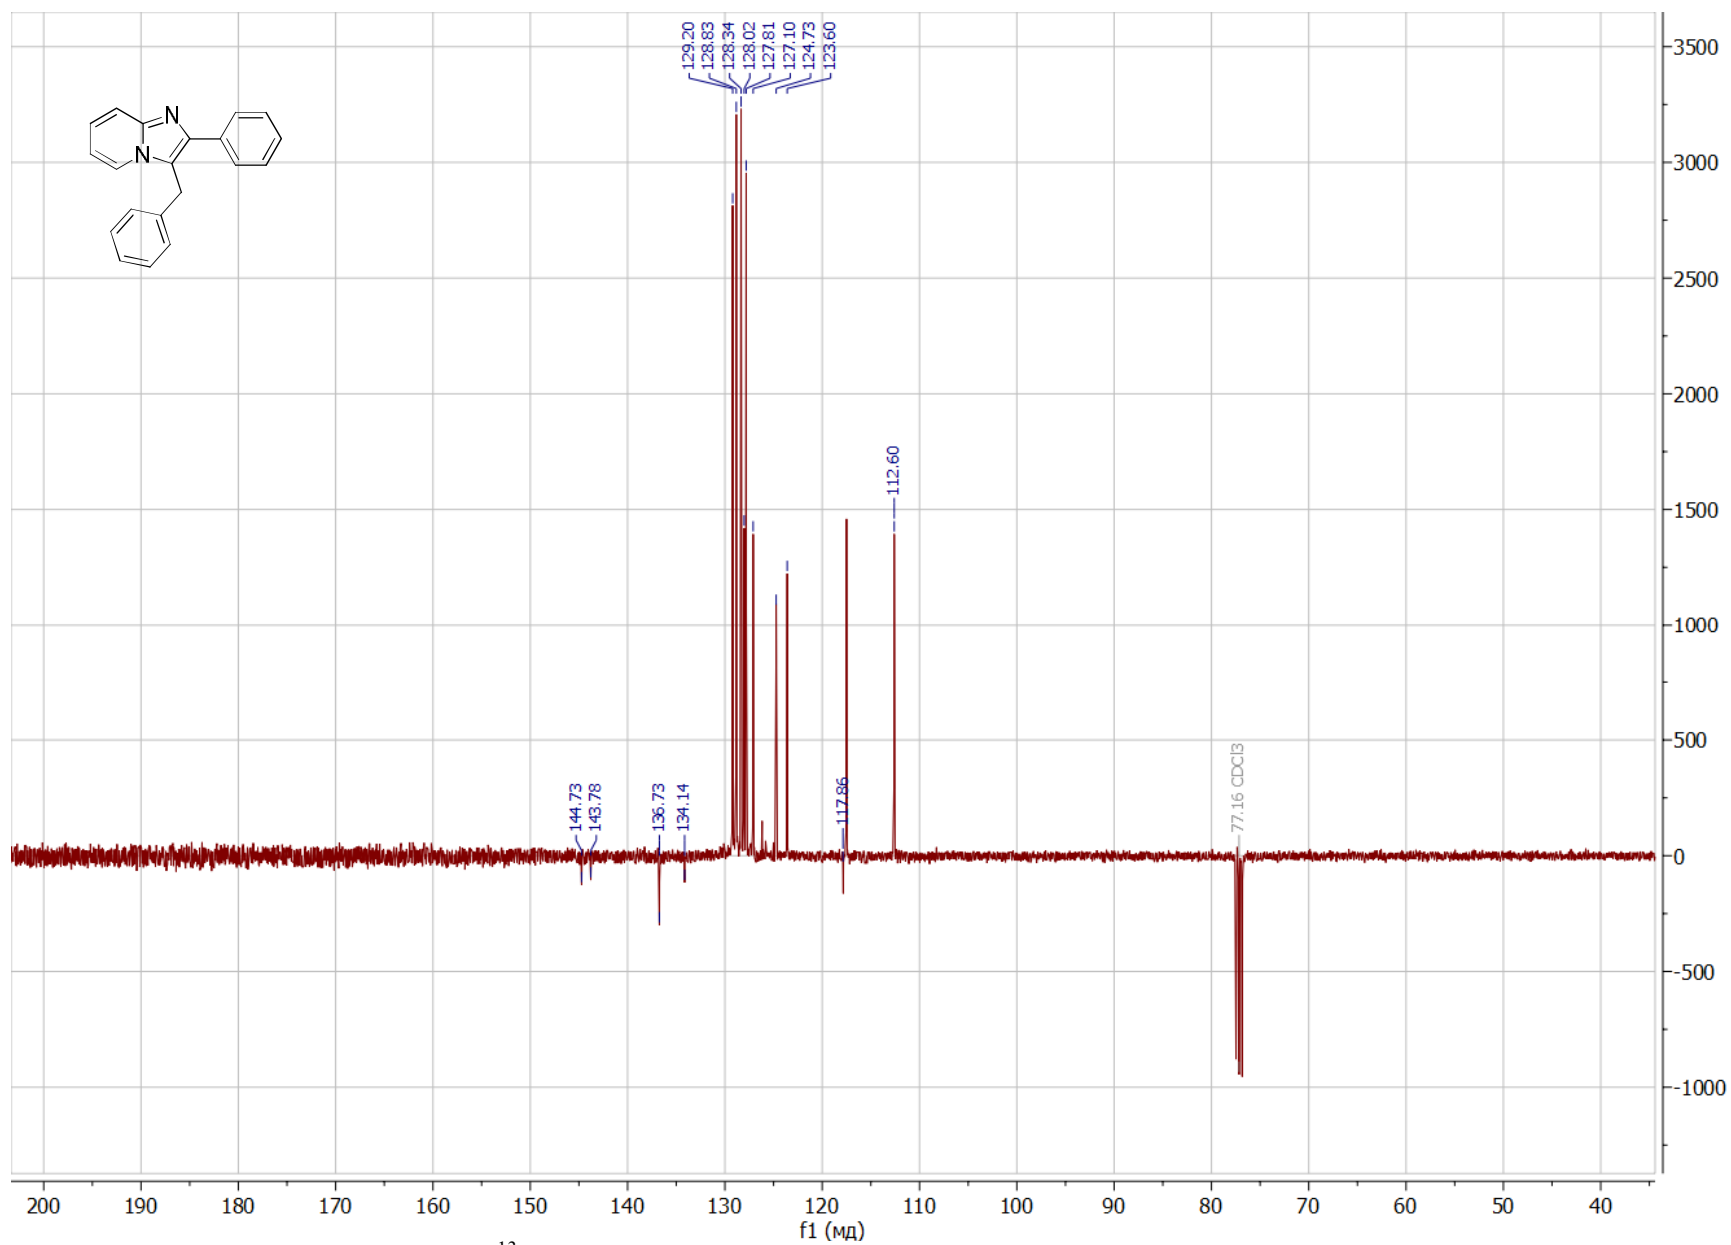

Figure S18.  $^{13}\text{C}$  NMR spectrum of imidazo[1,2-*a*]pyridine **10aaa** in  $\text{CDCl}_3$  (101 MHz)

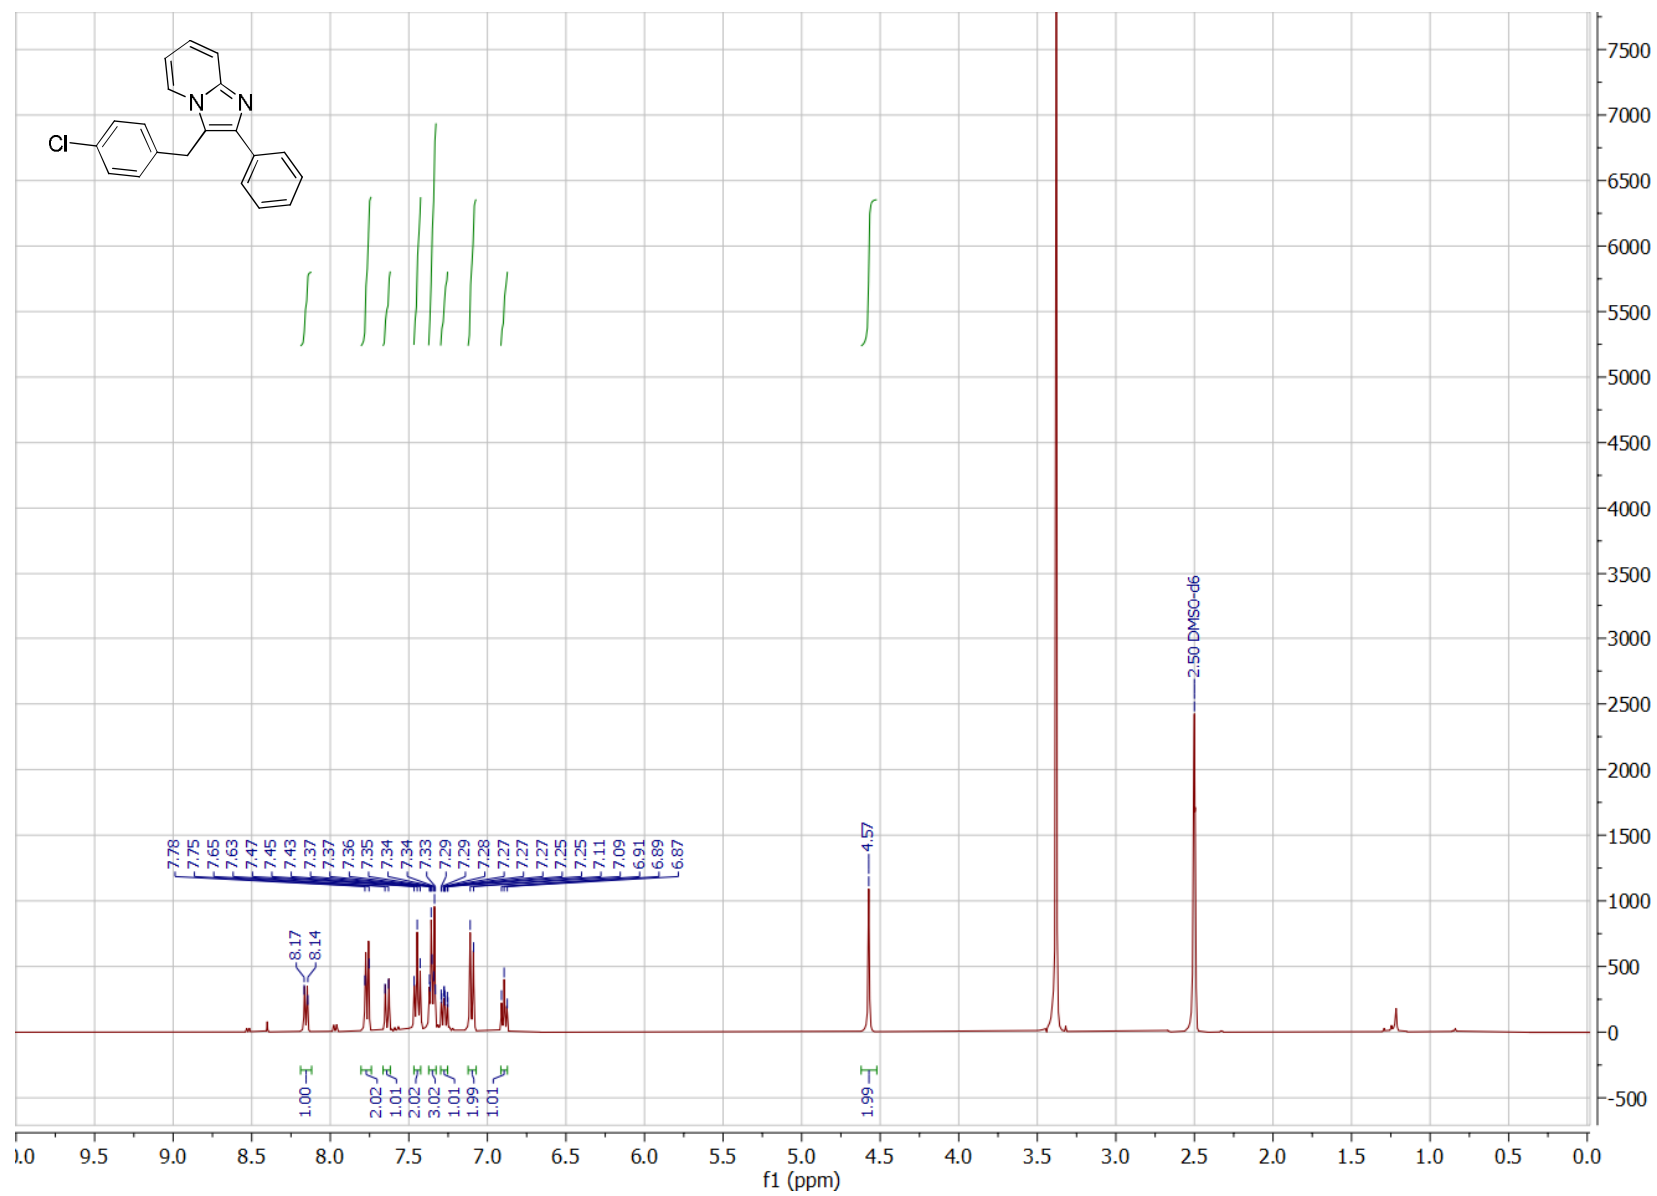

Figure S19. <sup>1</sup>H NMR spectrum of imidazo[1,2-*a*]pyridine **10aba** in DMSO-*d*<sub>6</sub> (400 MHz)

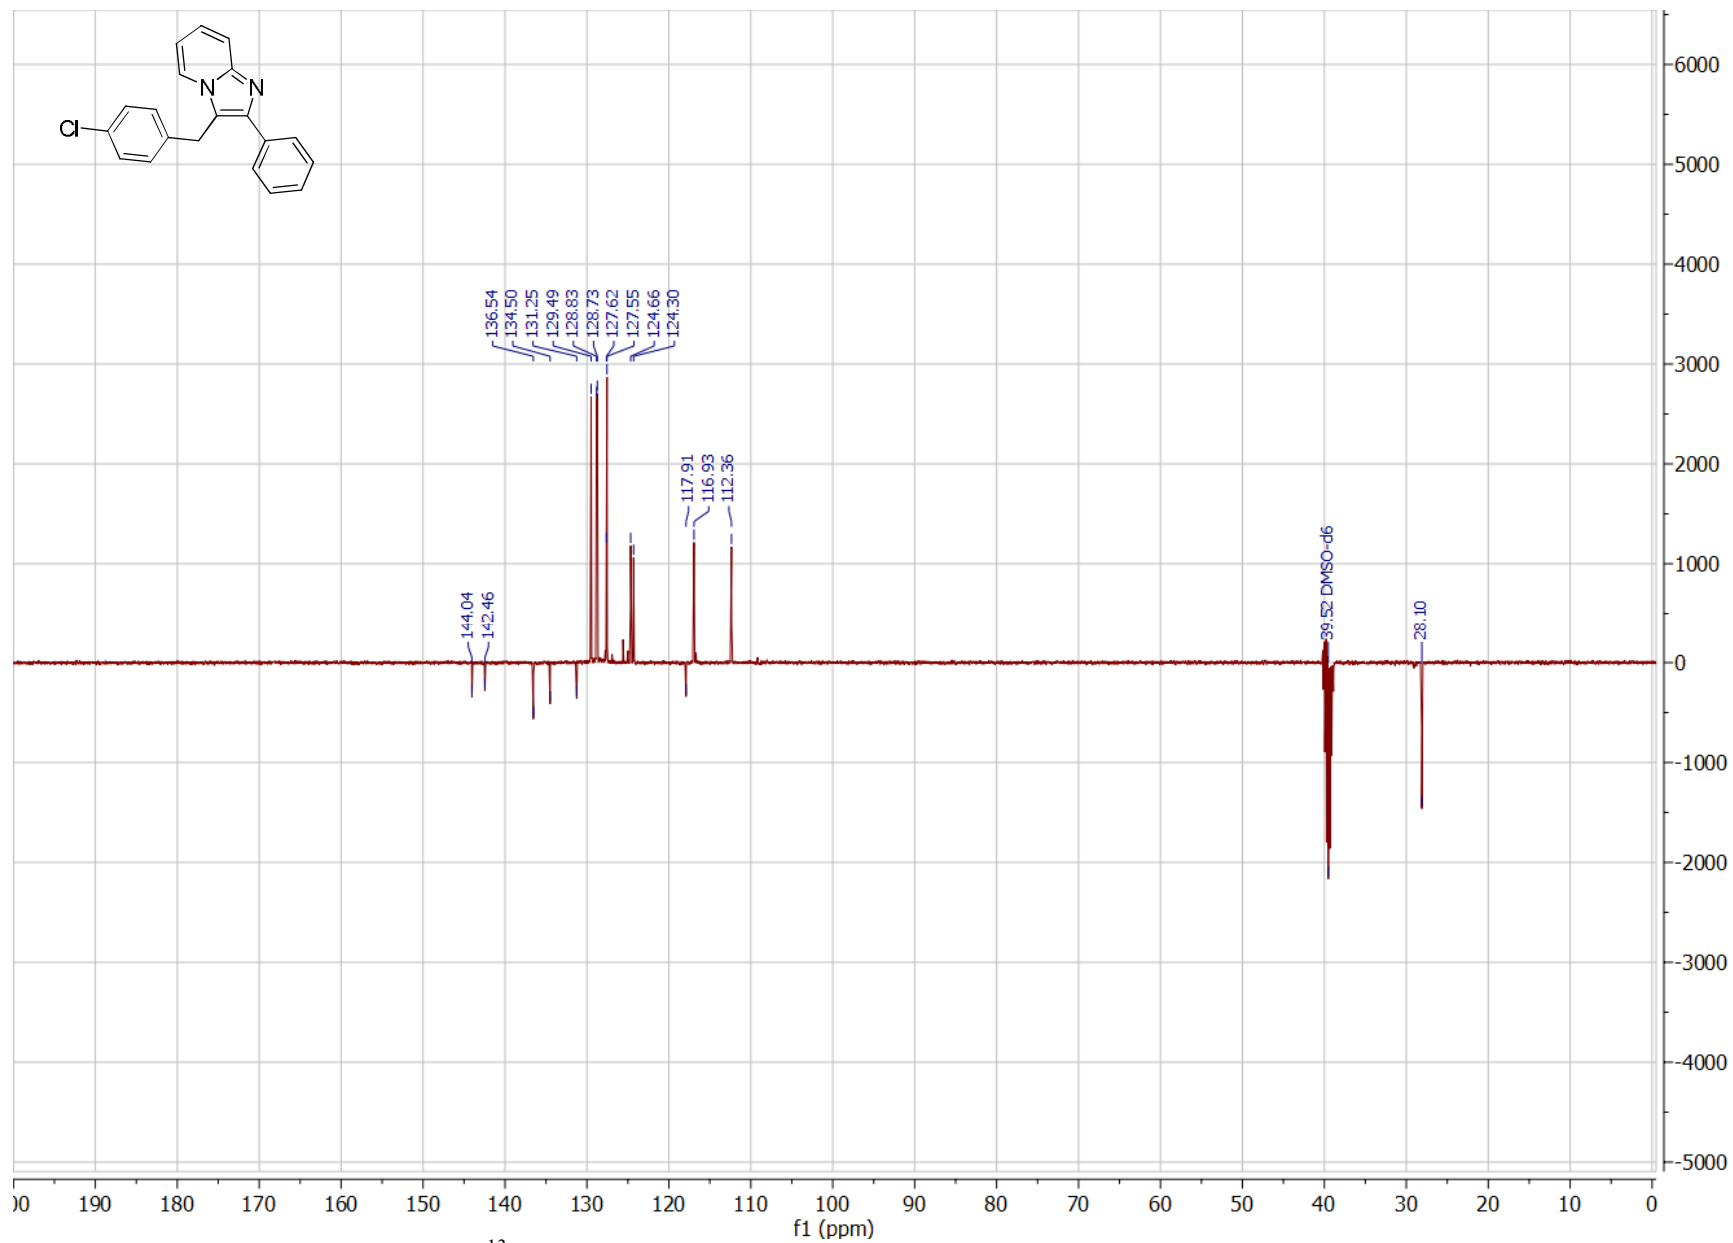

Figure S20.  $^{13}\text{C}$  NMR spectrum of imidazo[1,2-*a*]pyridine **10aba** in  $\text{DMSO-}d_6$  (101 MHz)

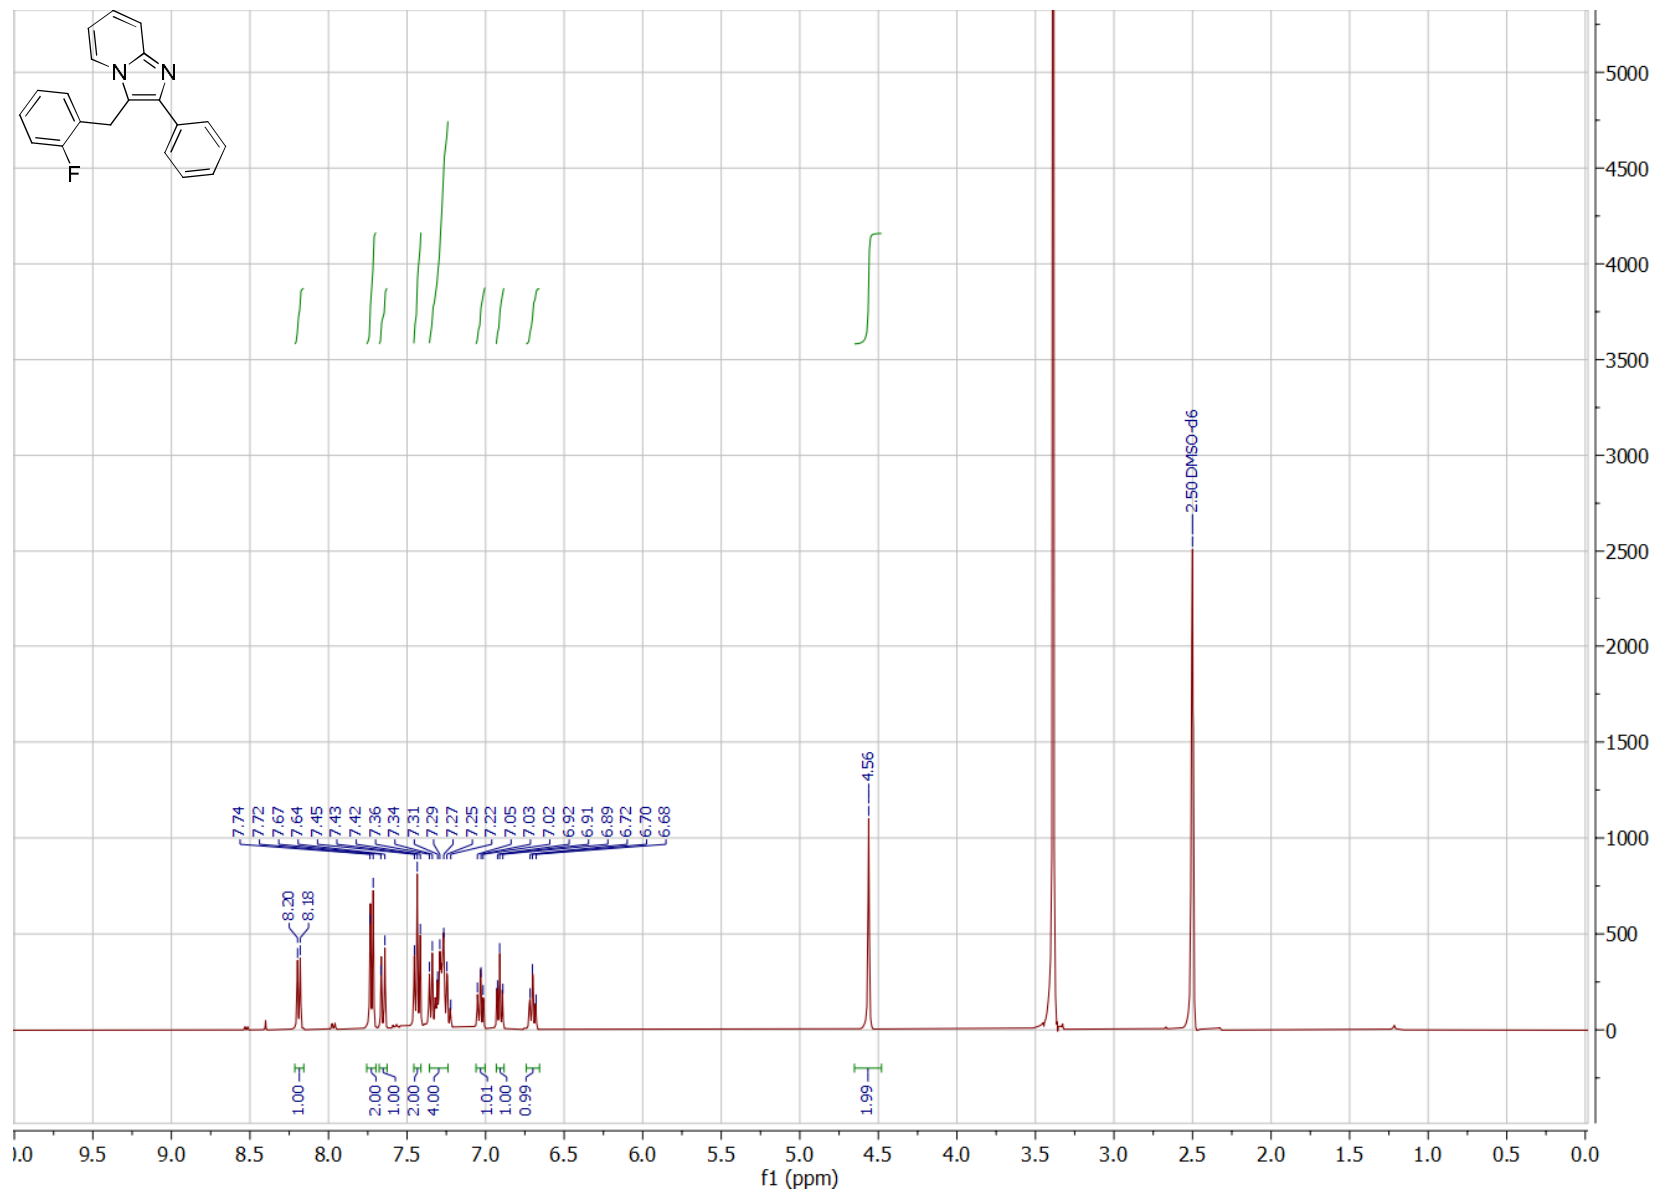

Figure S21. <sup>1</sup>H NMR spectrum of imidazo[1,2-*a*]pyridine **10aca** in DMSO-*d*<sub>6</sub> (400 MHz)

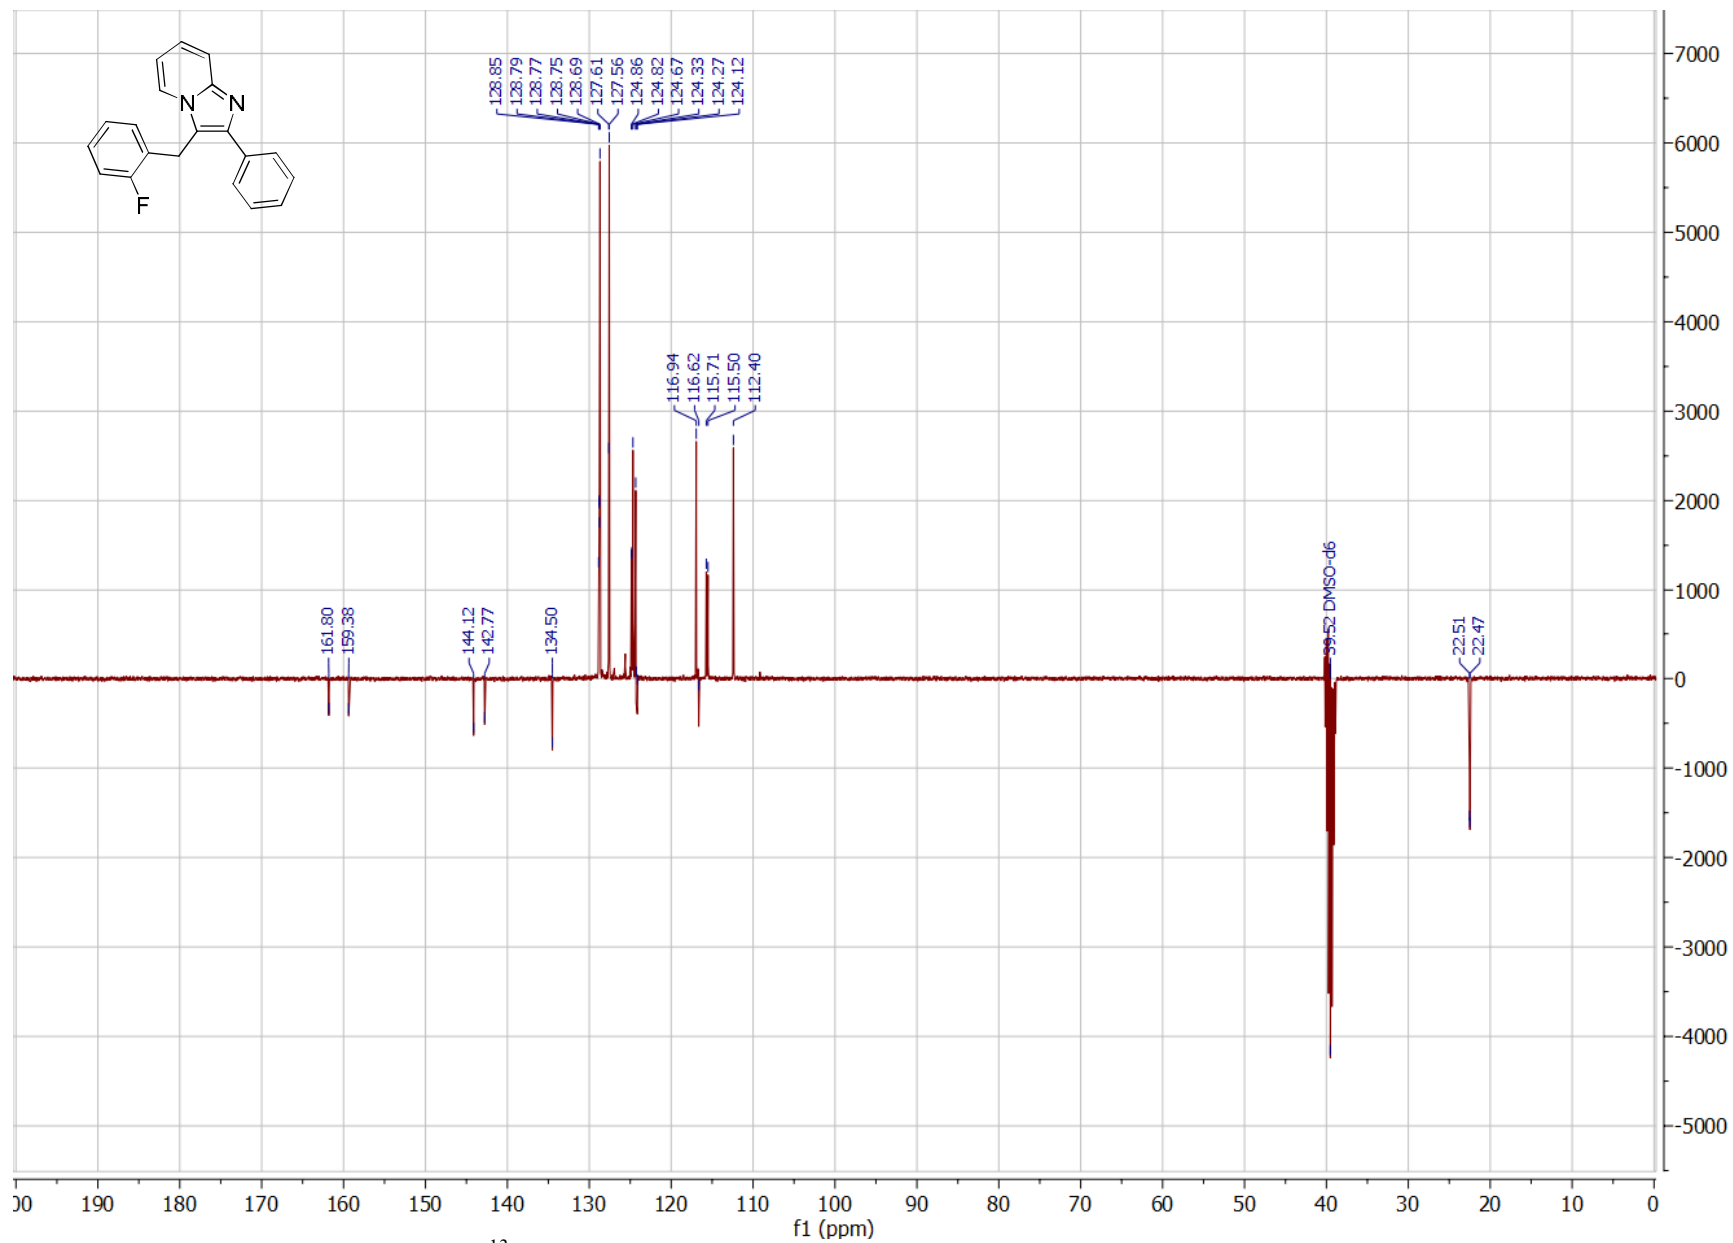

Figure S22.  $^{13}\text{C}$  NMR spectrum of imidazo[1,2-*a*]pyridine **10aca** in DMSO- $d_6$  (101 MHz)

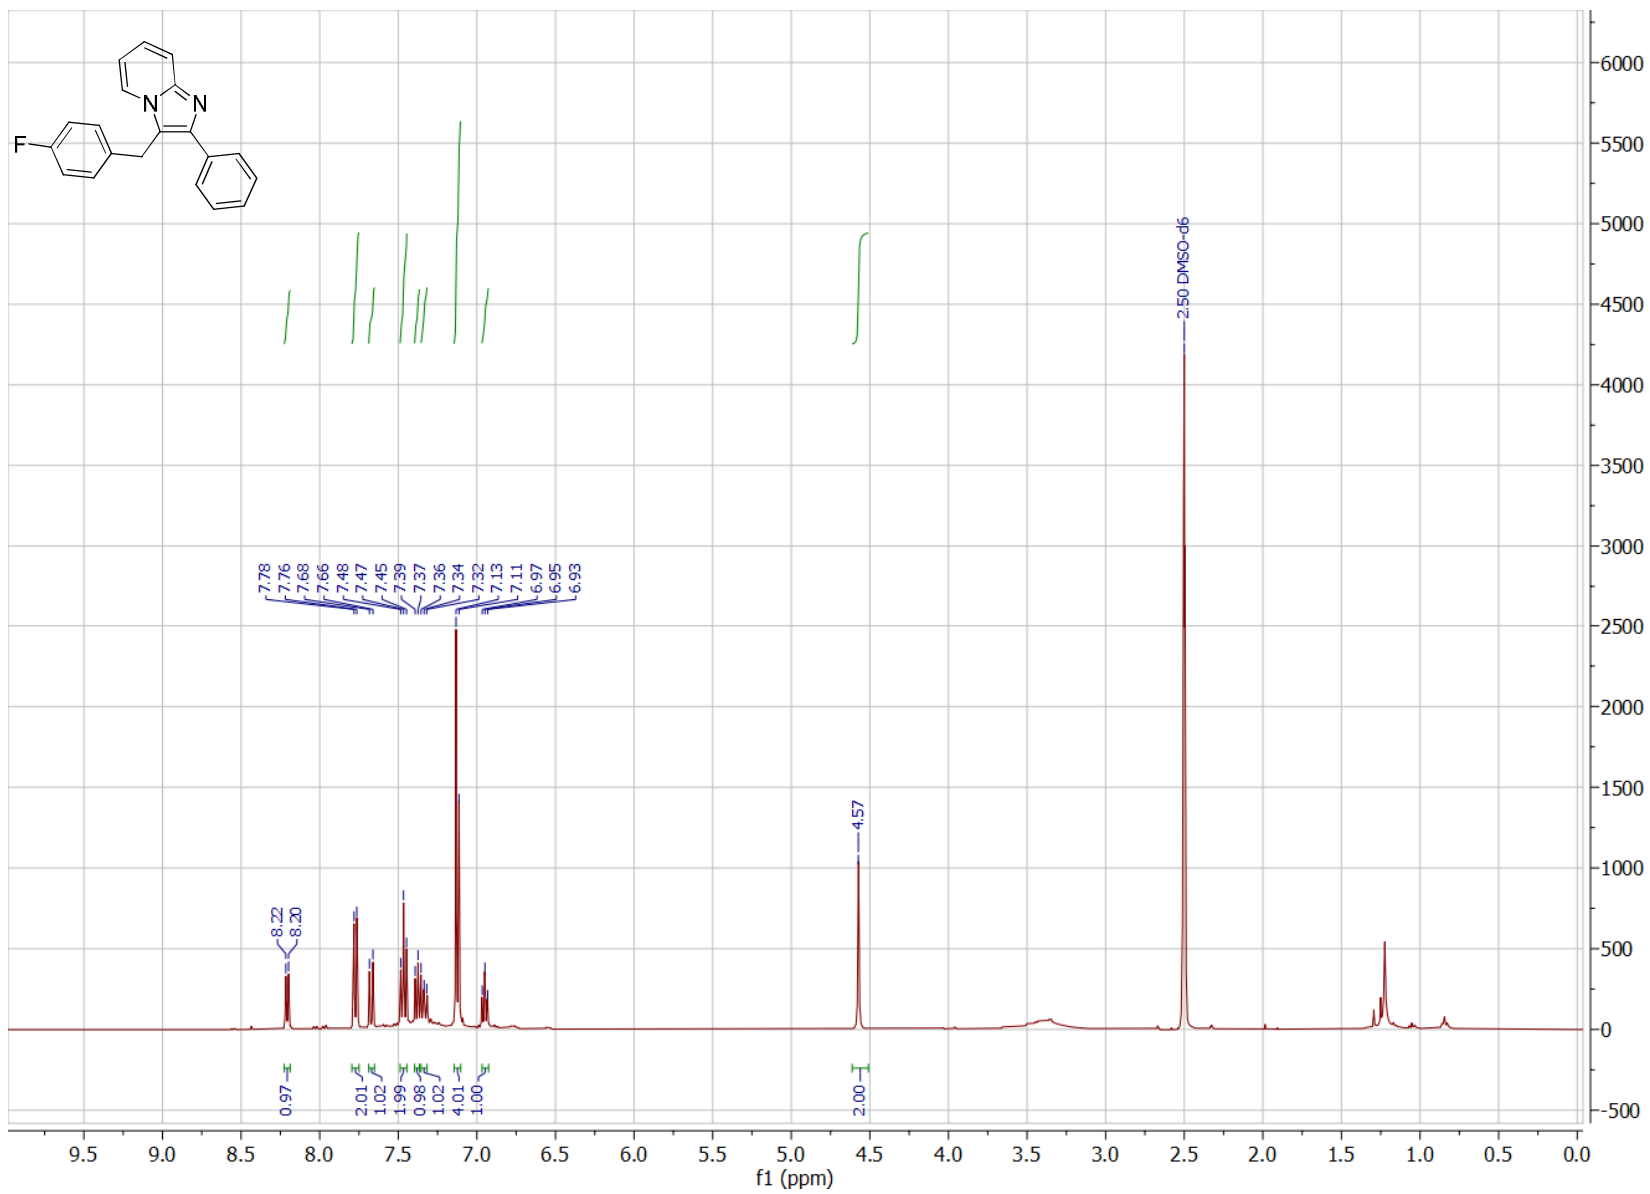

Figure S23. <sup>1</sup>H NMR spectrum of imidazo[1,2-*a*]pyridine **10ada** in DMSO-*d*<sub>6</sub> (400 MHz)



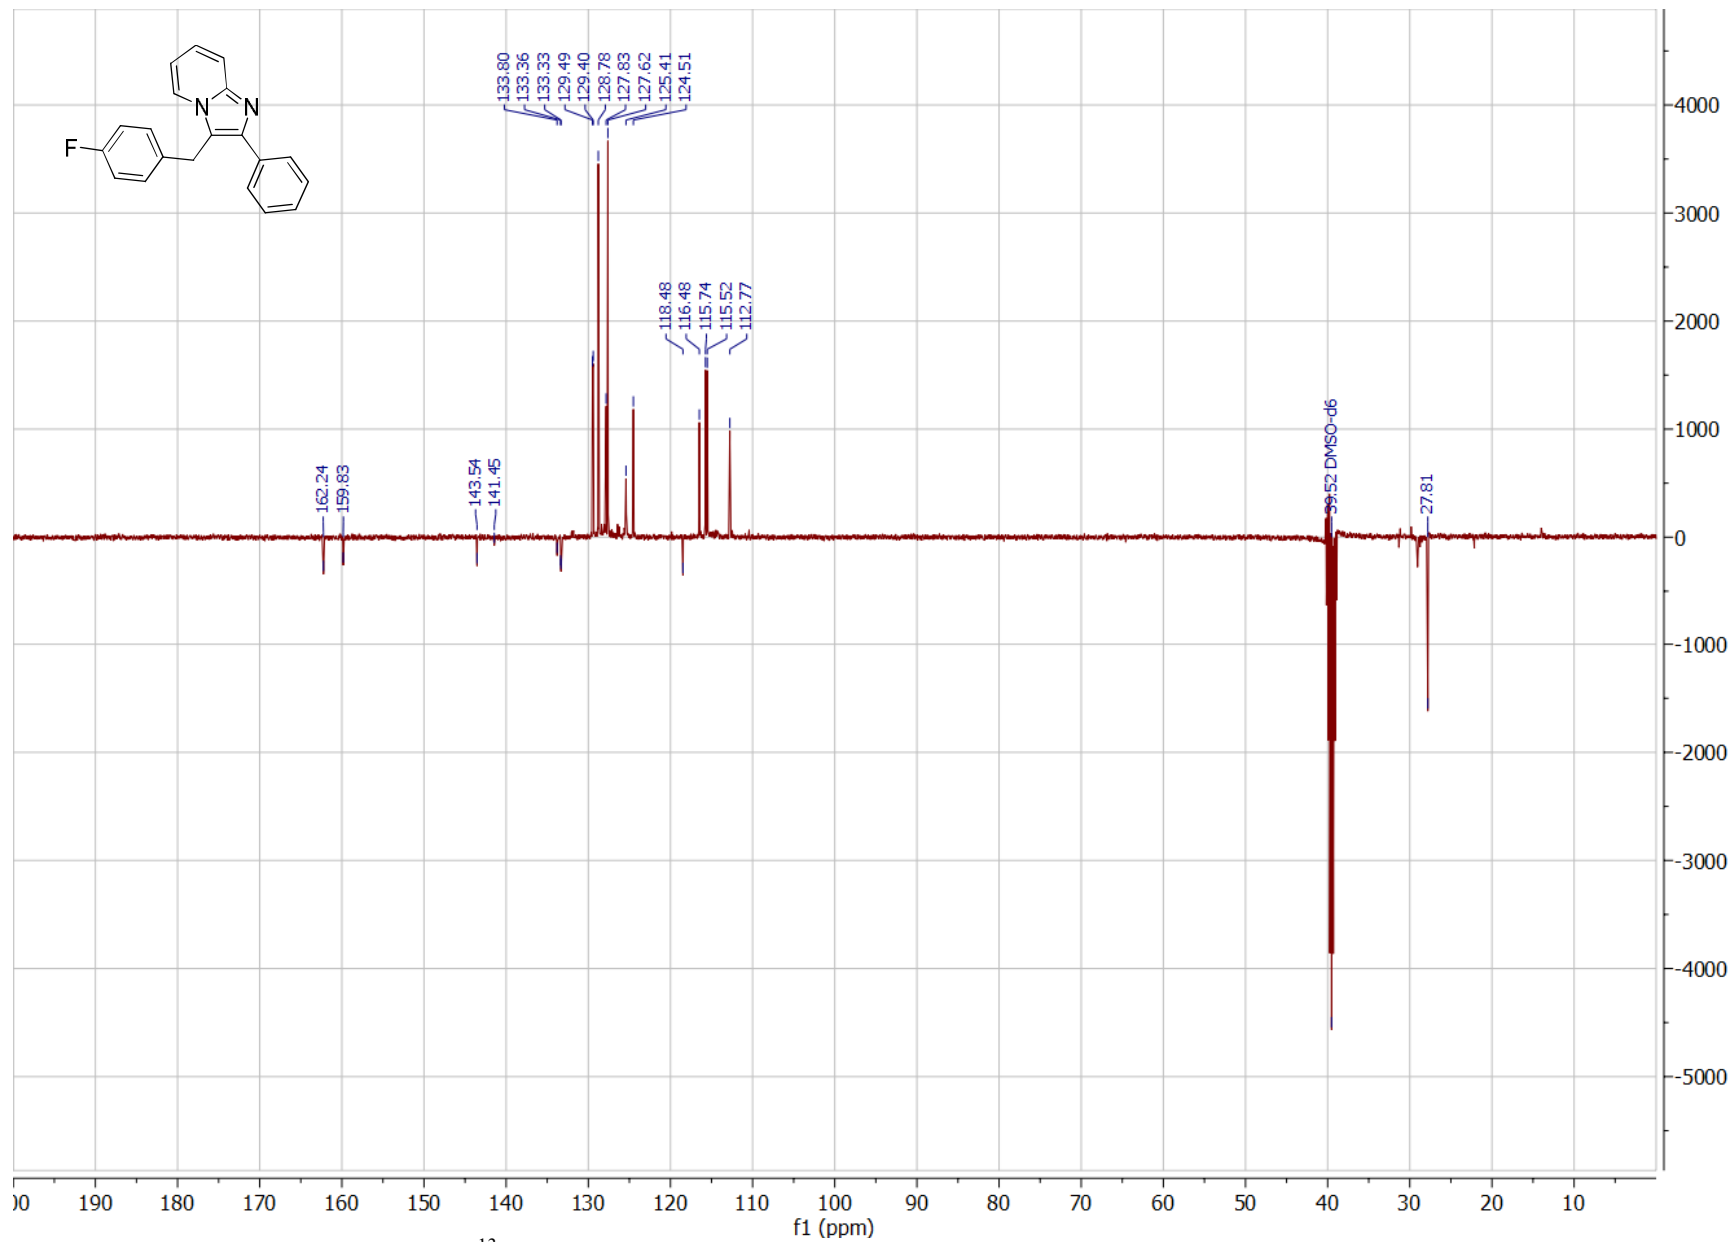

Figure S24. <sup>13</sup>C NMR spectrum of imidazo[1,2-a]pyridine **10ada** in DMSO-*d*<sub>6</sub> (101 MHz)

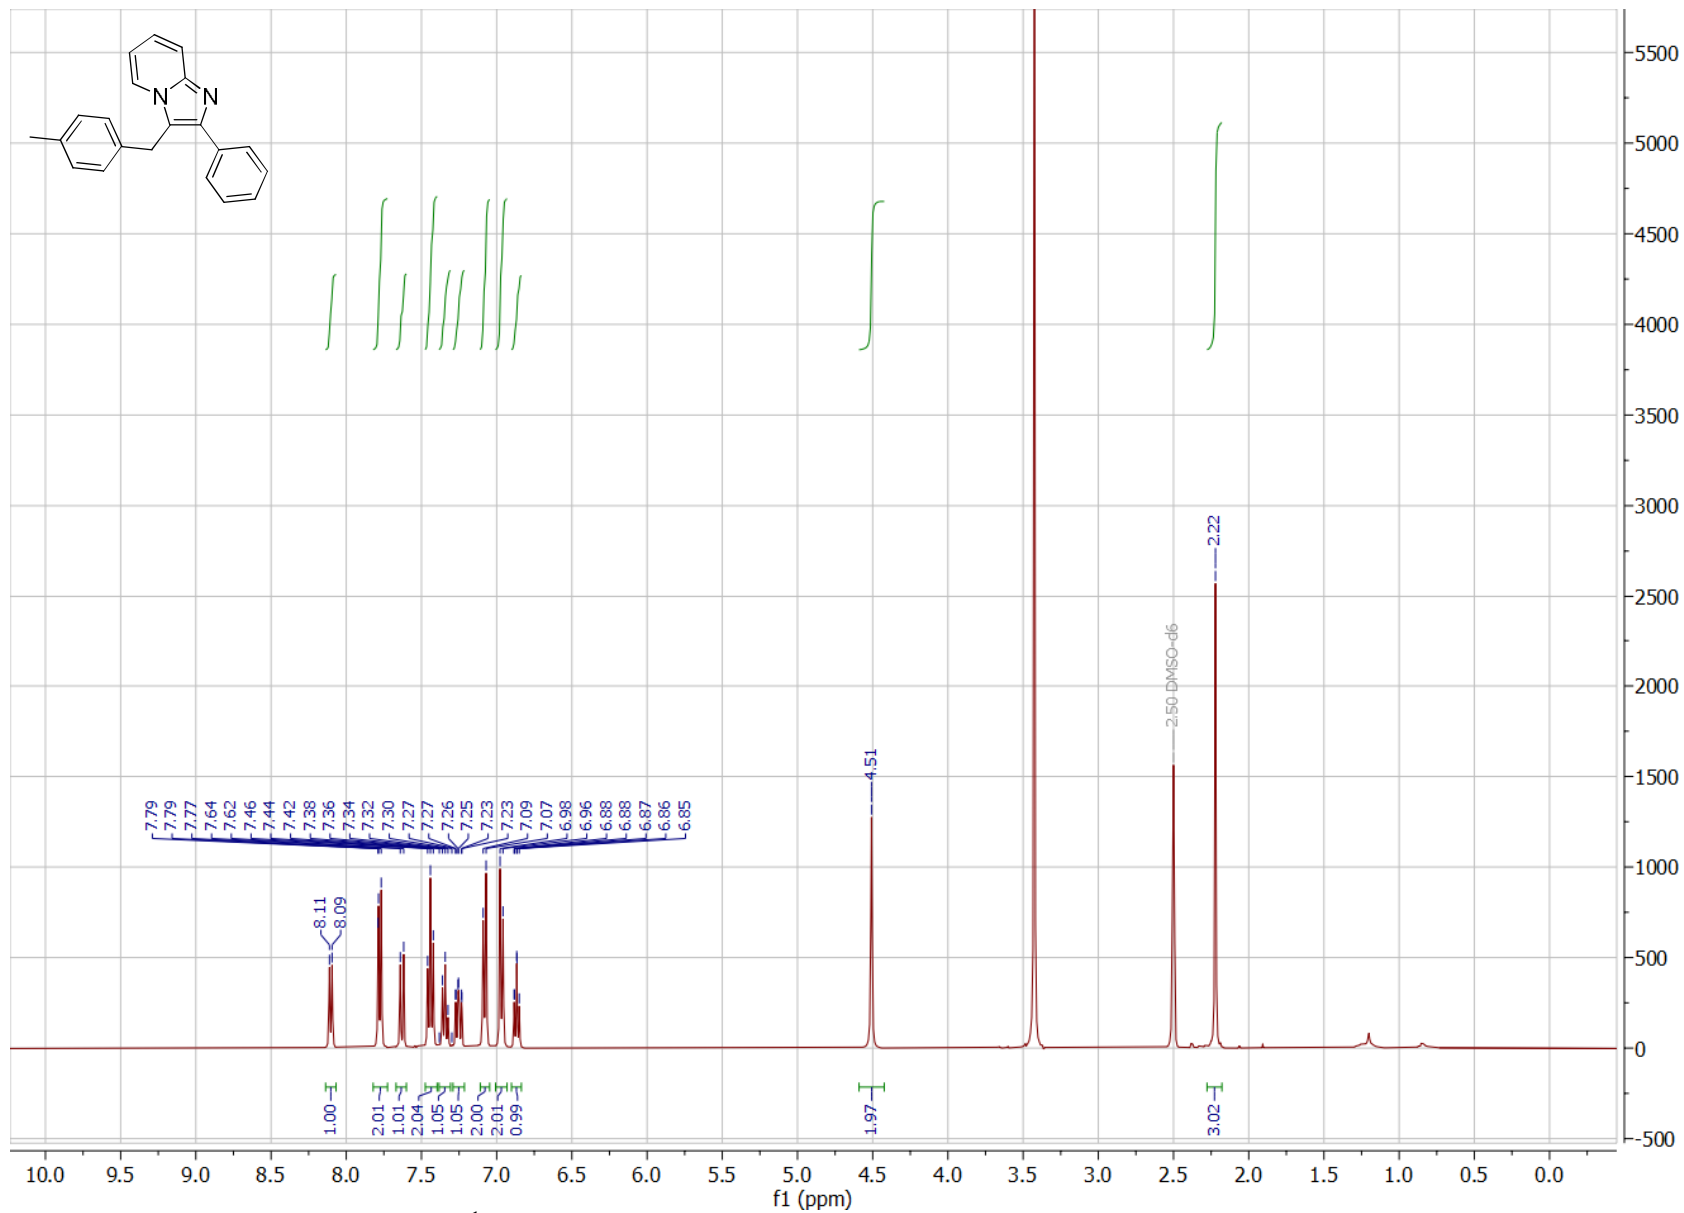

Figure S25. <sup>1</sup>H NMR spectrum of imidazo[1,2-*a*]pyridine **10aea** in DMSO-*d*<sub>6</sub> (400 MHz)

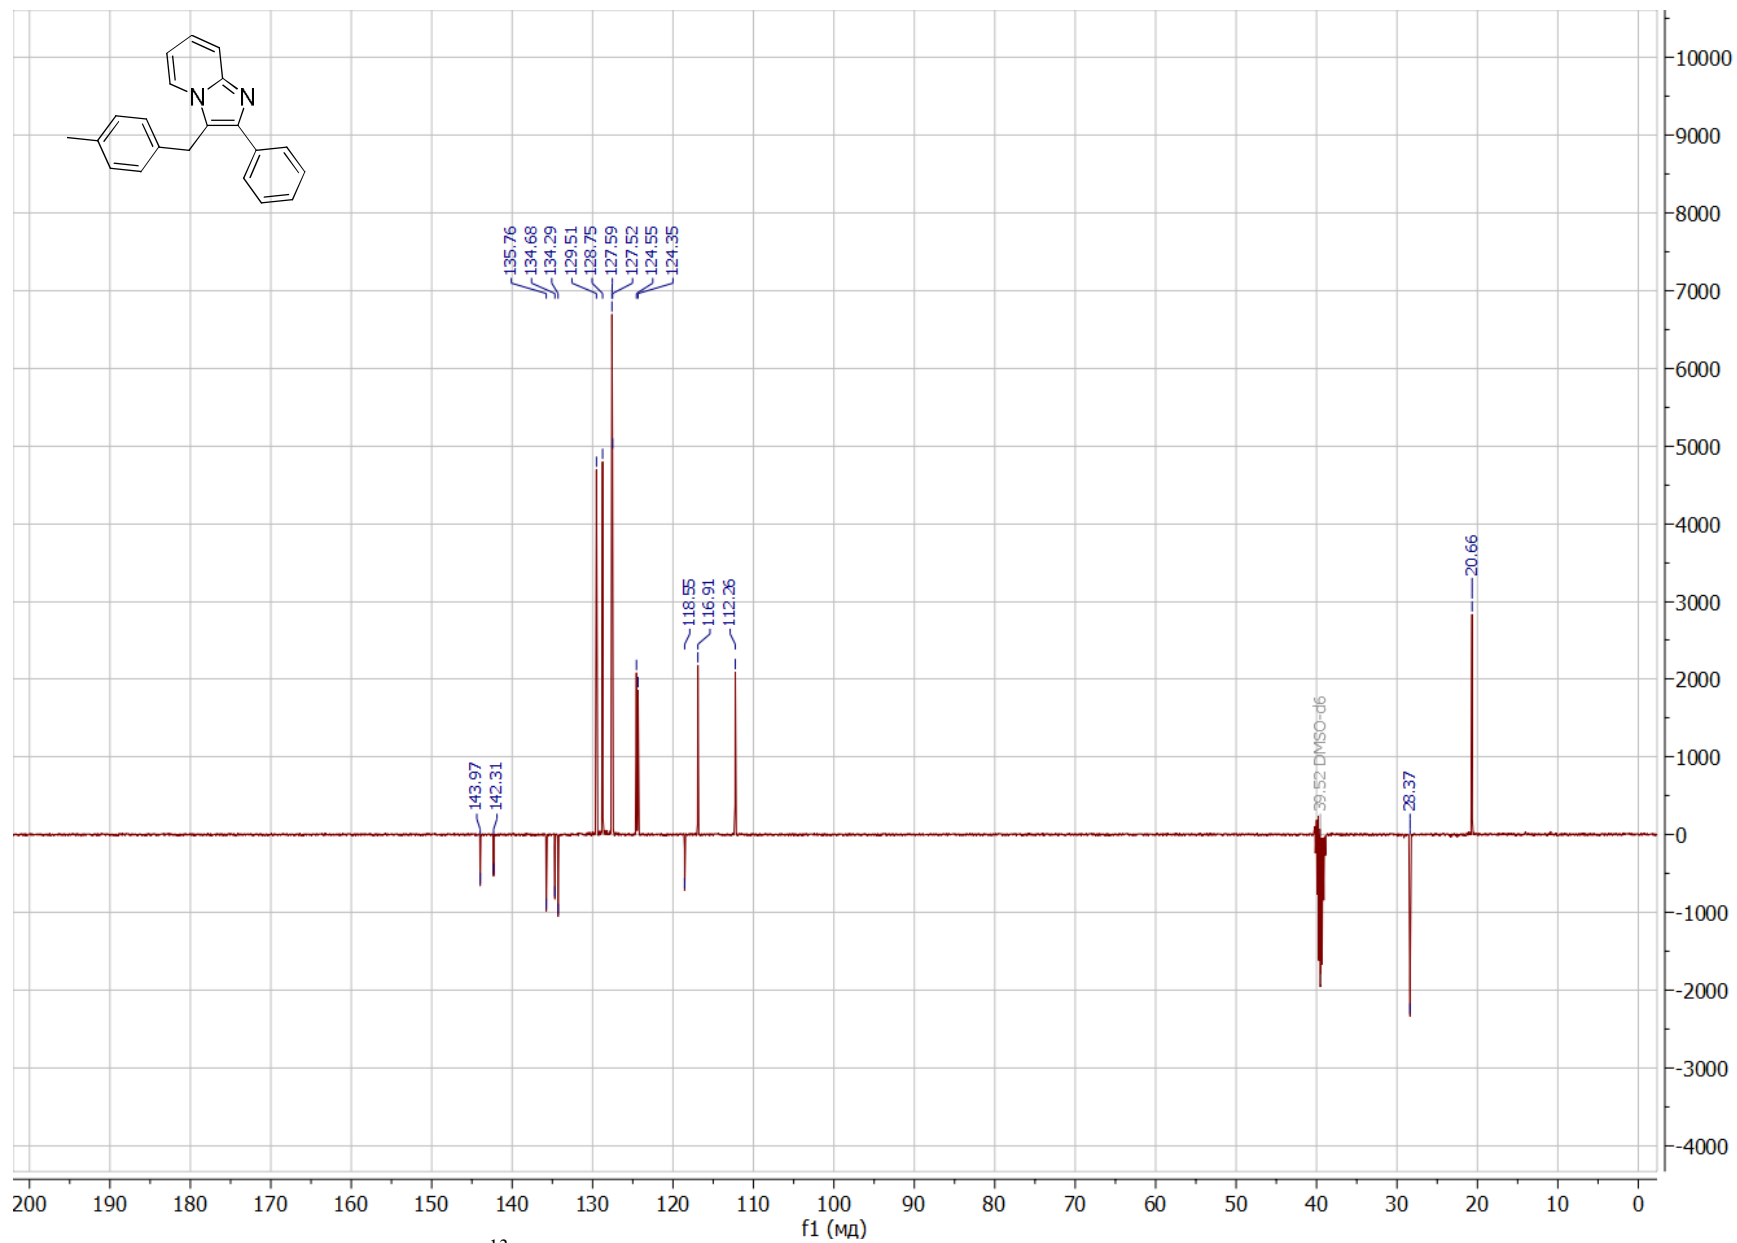

Figure S26. <sup>13</sup>C NMR spectrum of imidazo[1,2-*a*]pyridine **10aea** in DMSO-*d*<sub>6</sub> (101 MHz)

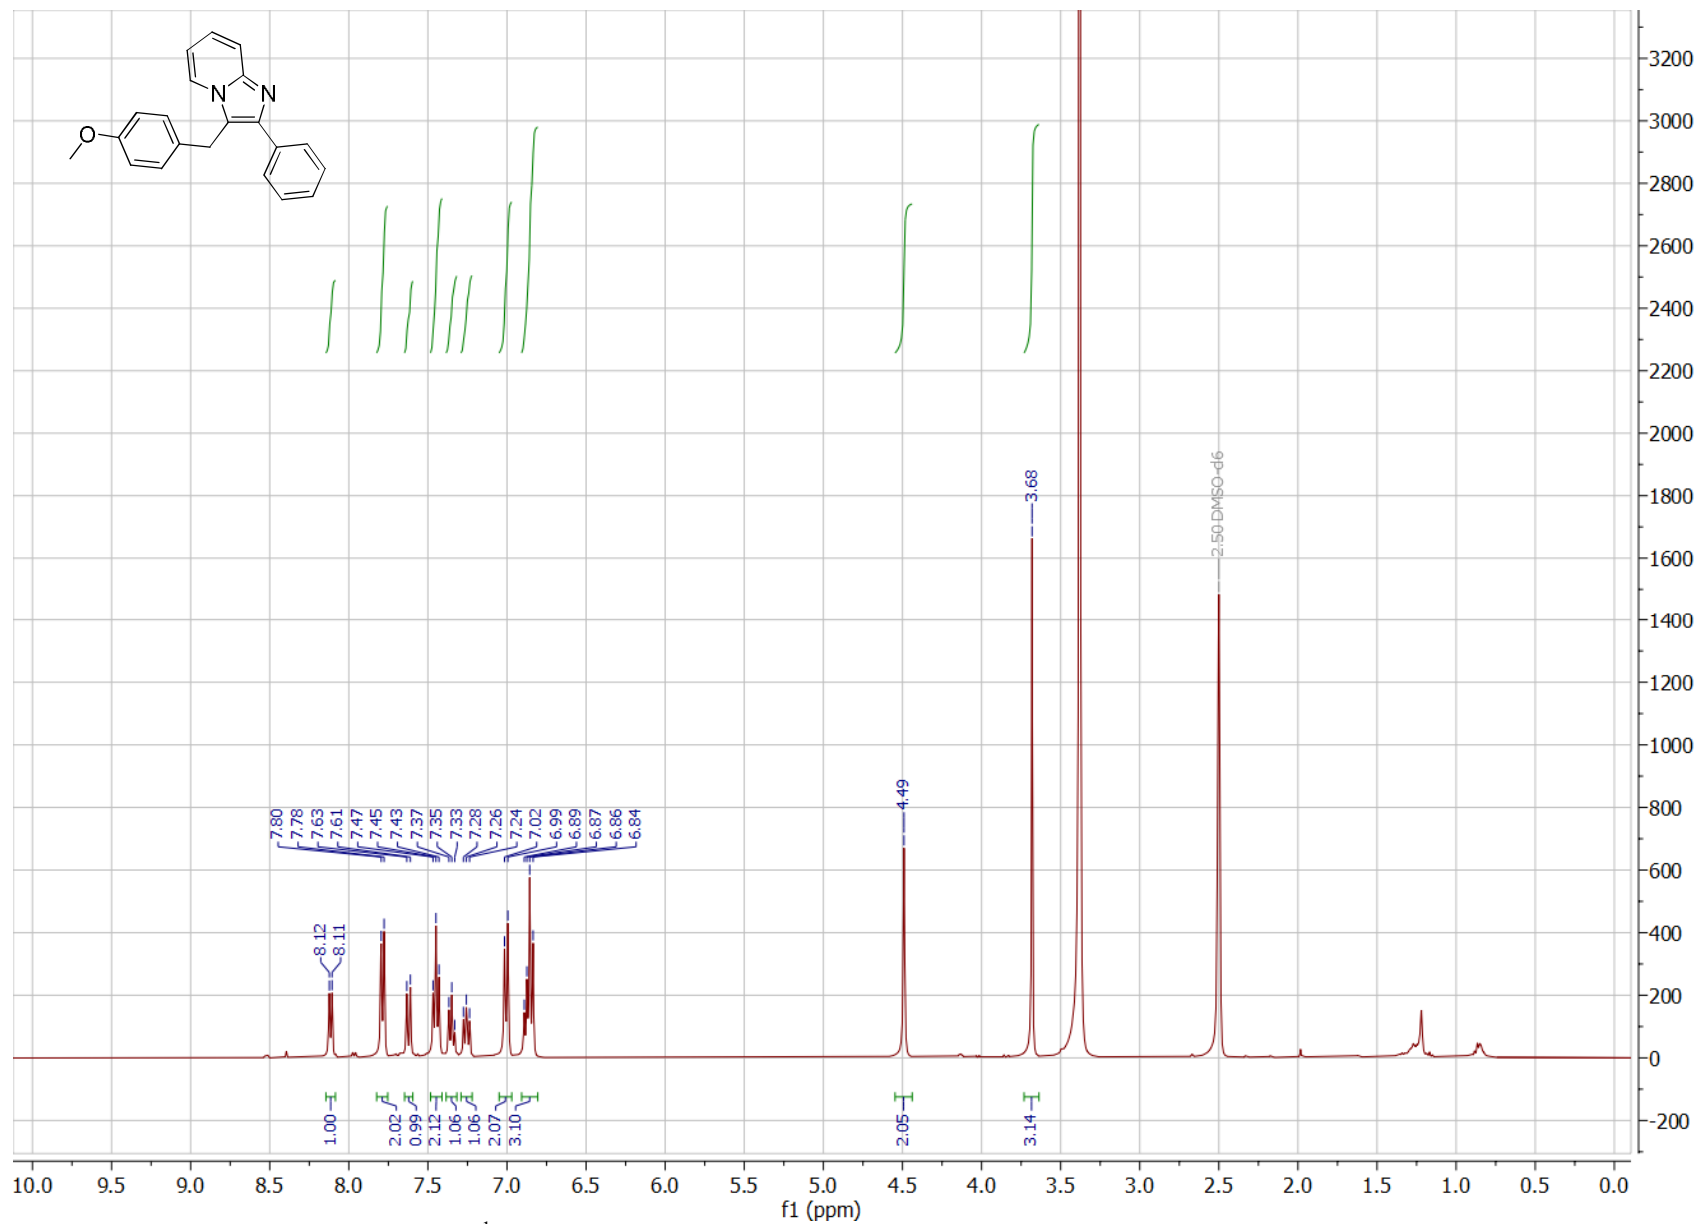

Figure S27. <sup>1</sup>H NMR spectrum of imidazo[1,2-a]pyridine **10afa** in DMSO-*d*<sub>6</sub> (400 MHz)

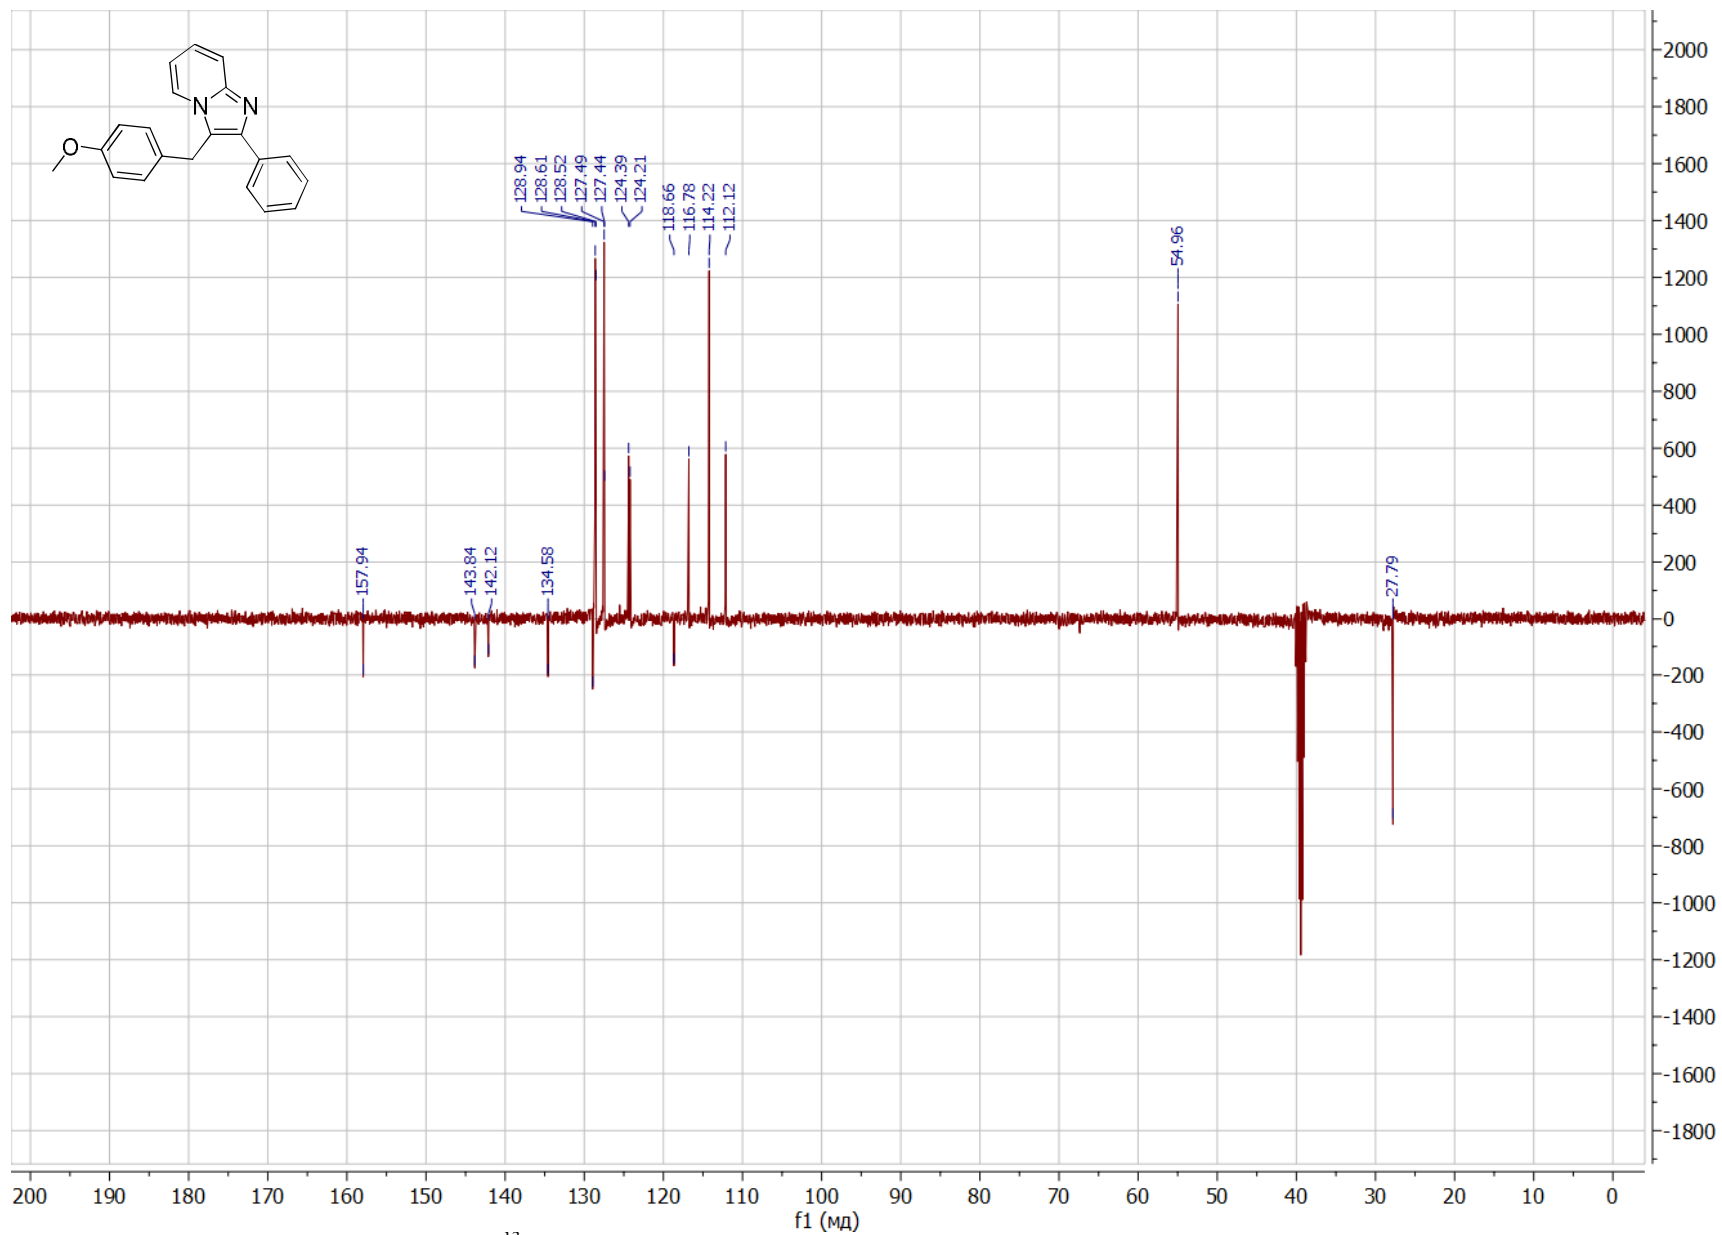

Figure S28.  $^{13}\text{C}$  NMR spectrum of imidazo[1,2-*a*]pyridine **10afa** in  $\text{DMSO-}d_6$  (101 MHz)

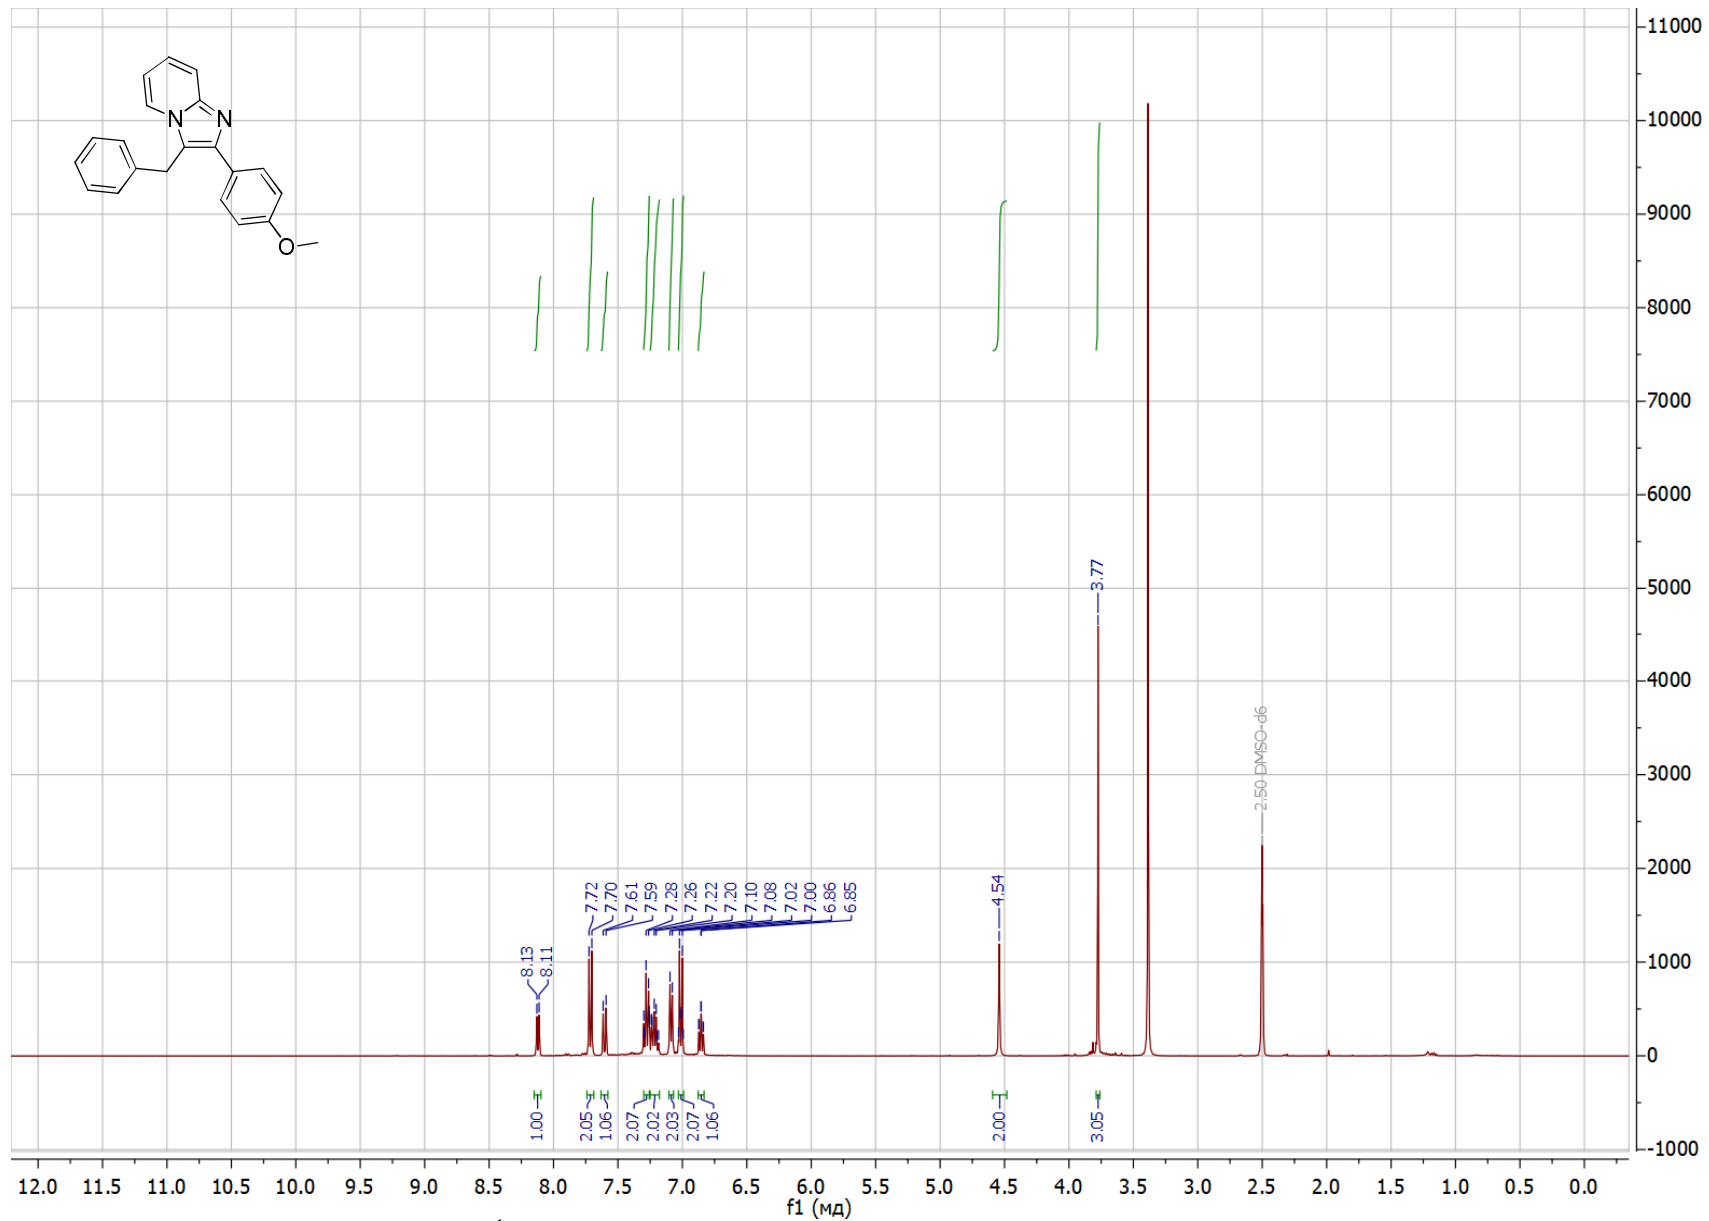

Figure S29. <sup>1</sup>H NMR spectrum of imidazo[1,2-*a*]pyridine **10caa** in DMSO-*d*<sub>6</sub> (400 MHz)

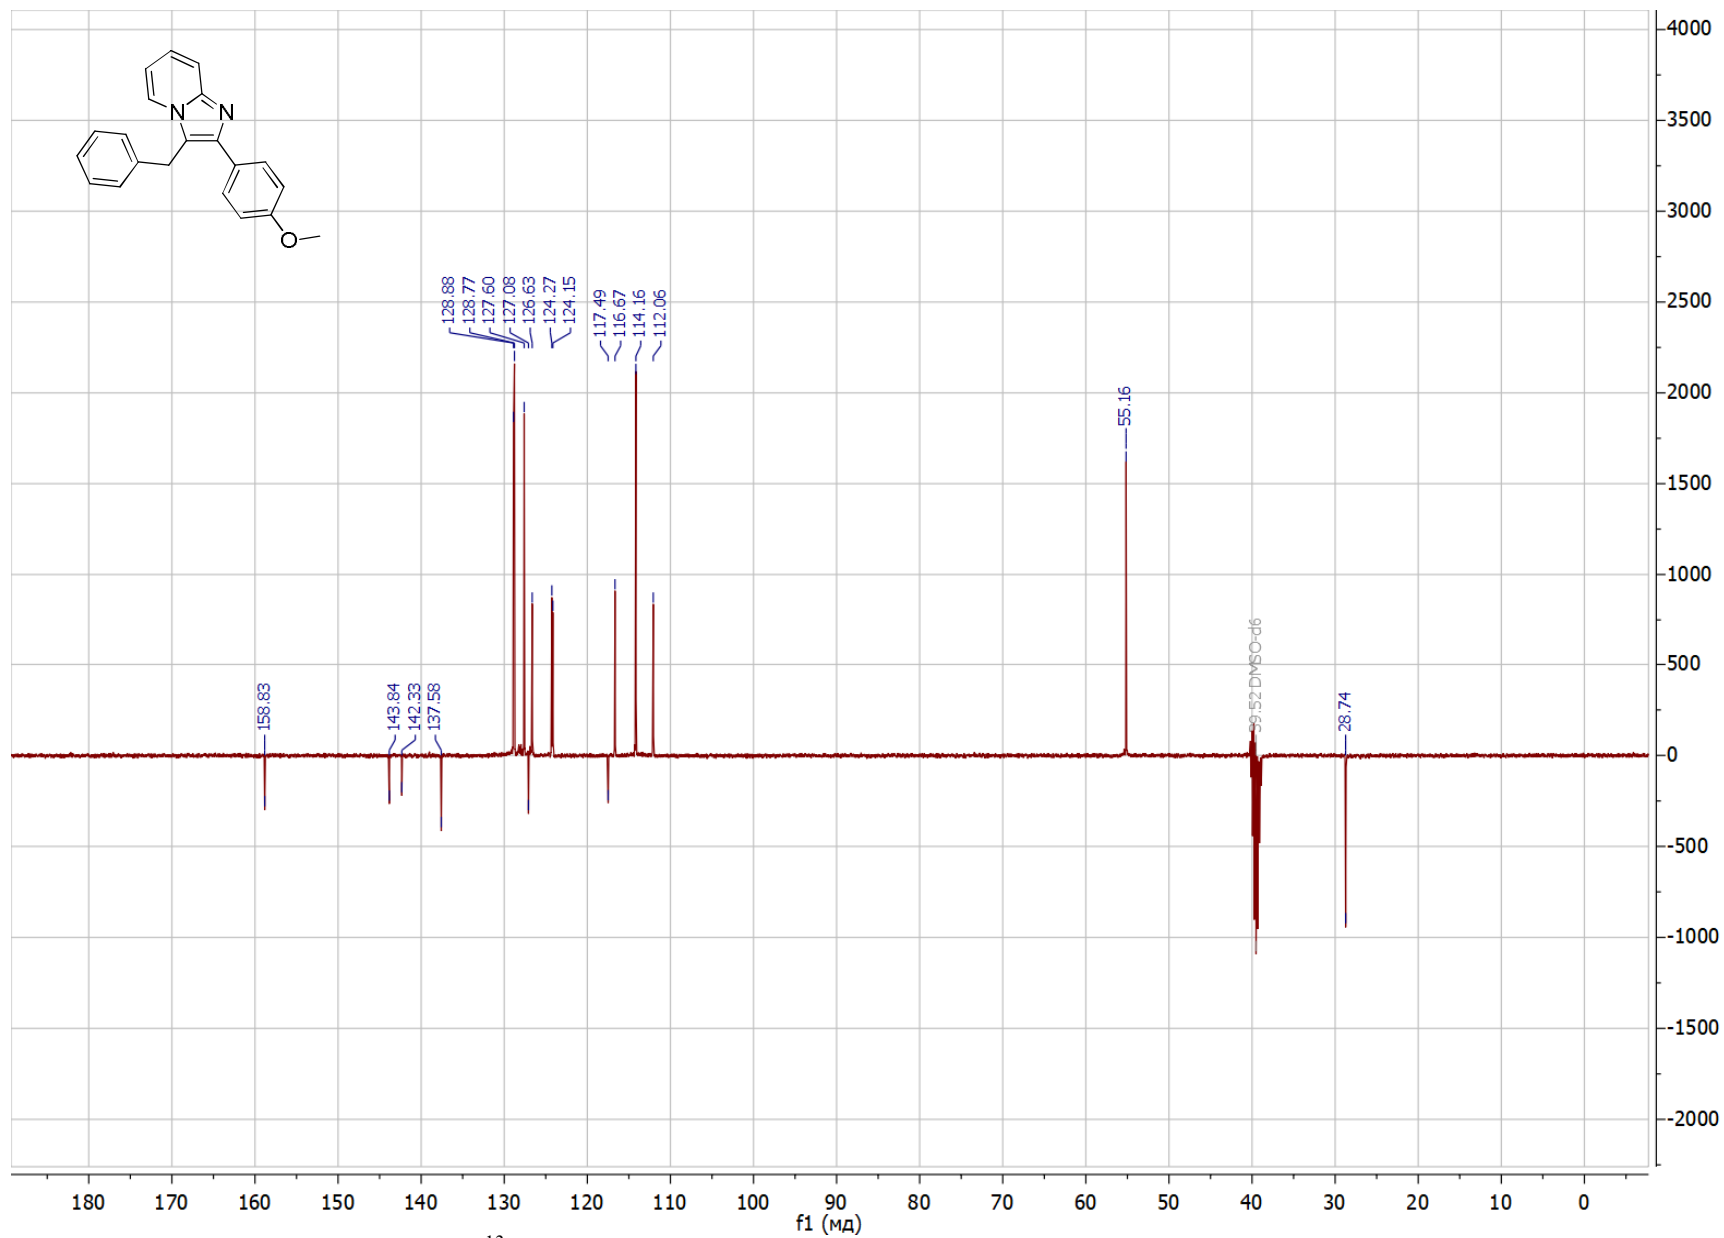

Figure S30.  $^{13}\text{C}$  NMR spectrum of imidazo[1,2-*a*]pyridine **10caa** in  $\text{DMSO-}d_6$  (101 MHz)

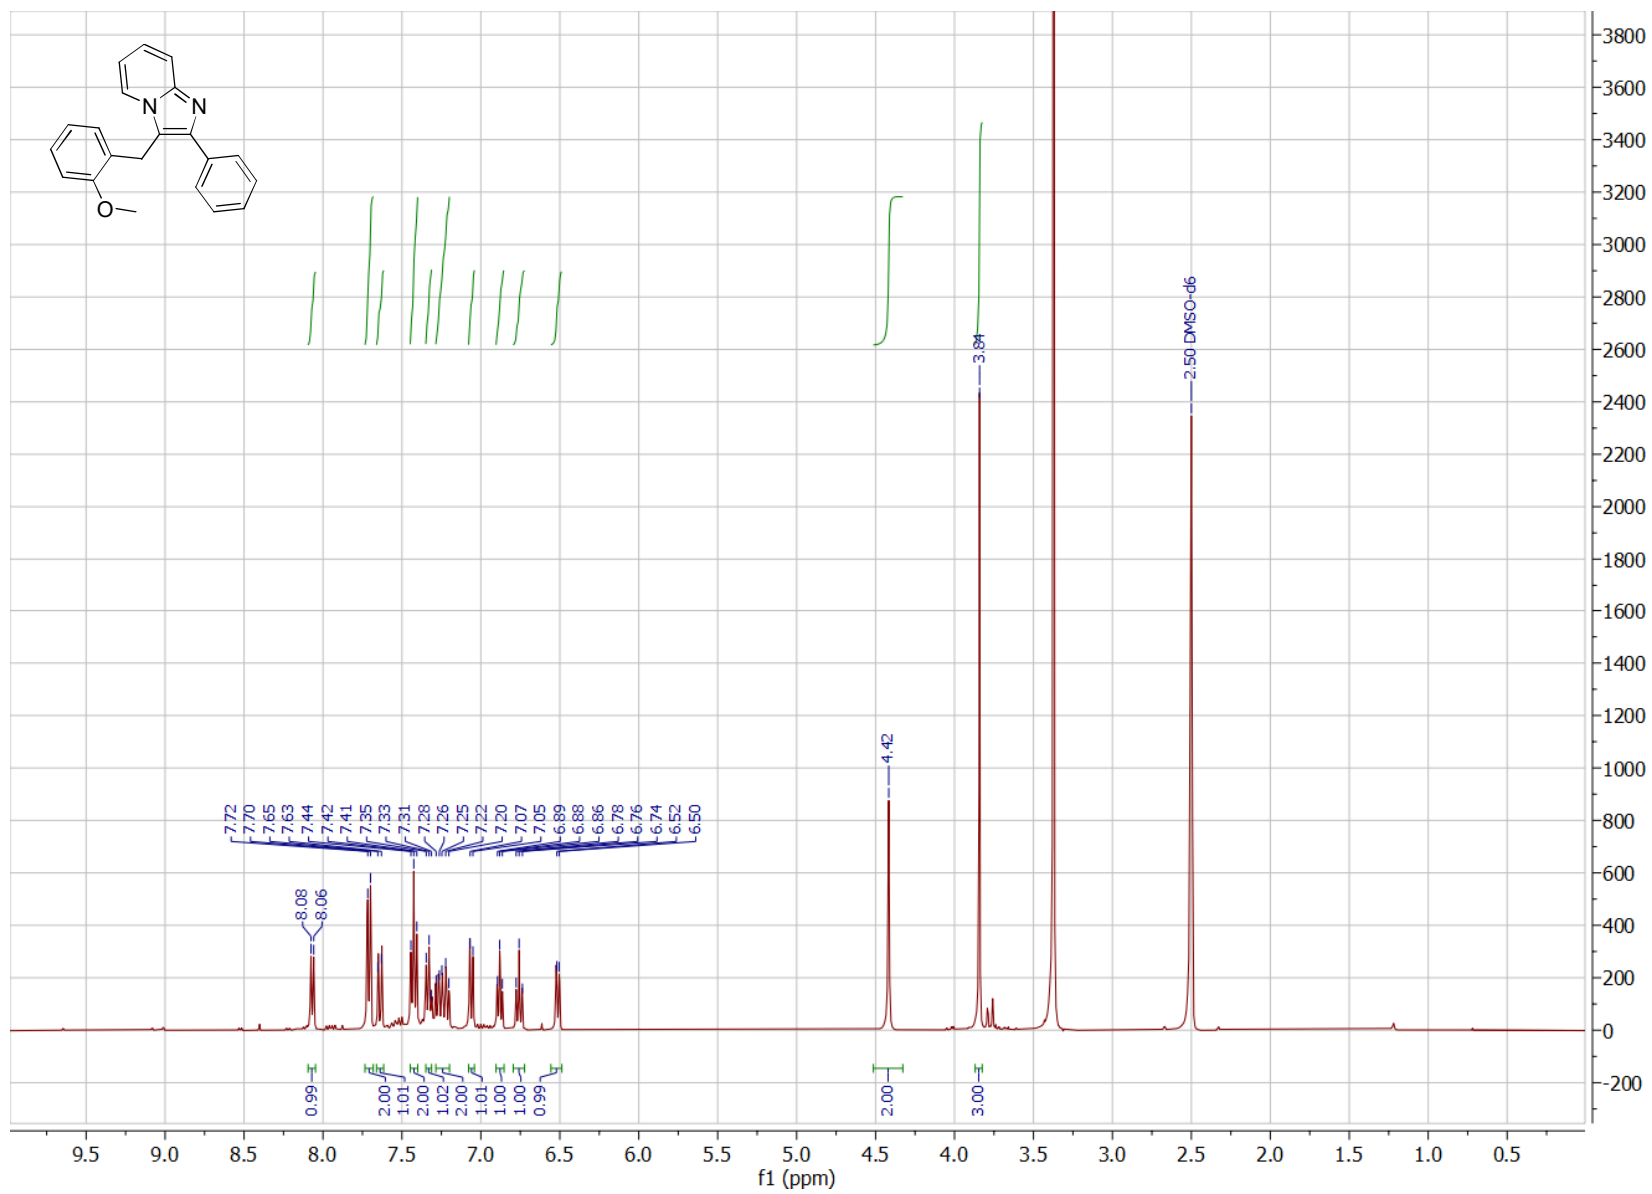

Figure S31. <sup>1</sup>H NMR spectrum of imidazo[1,2-*a*]pyridine **10ga** in DMSO-*d*<sub>6</sub> (400 MHz)



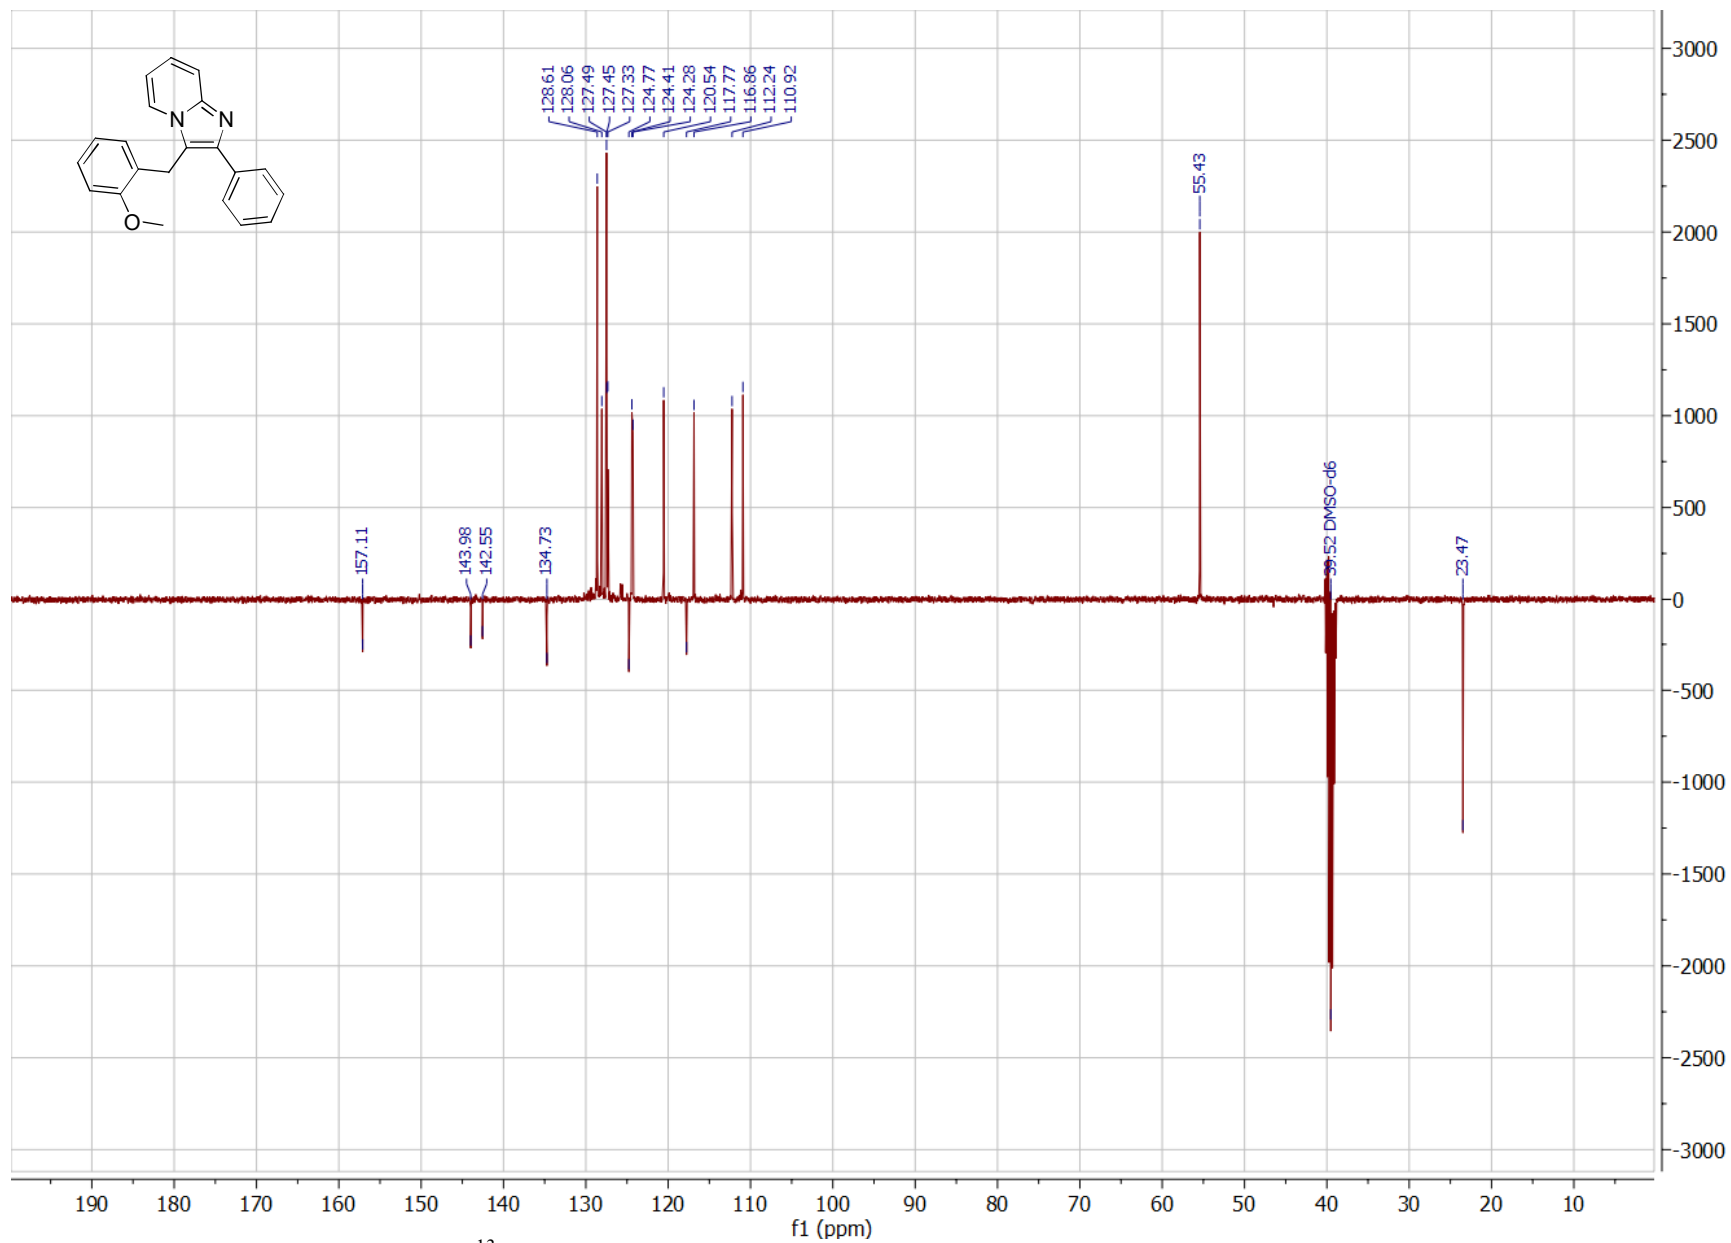

Figure S32.  $^{13}\text{C}$  NMR spectrum of imidazo[1,2-*a*]pyridine **10aga** in  $\text{DMSO-}d_6$  (101 MHz)

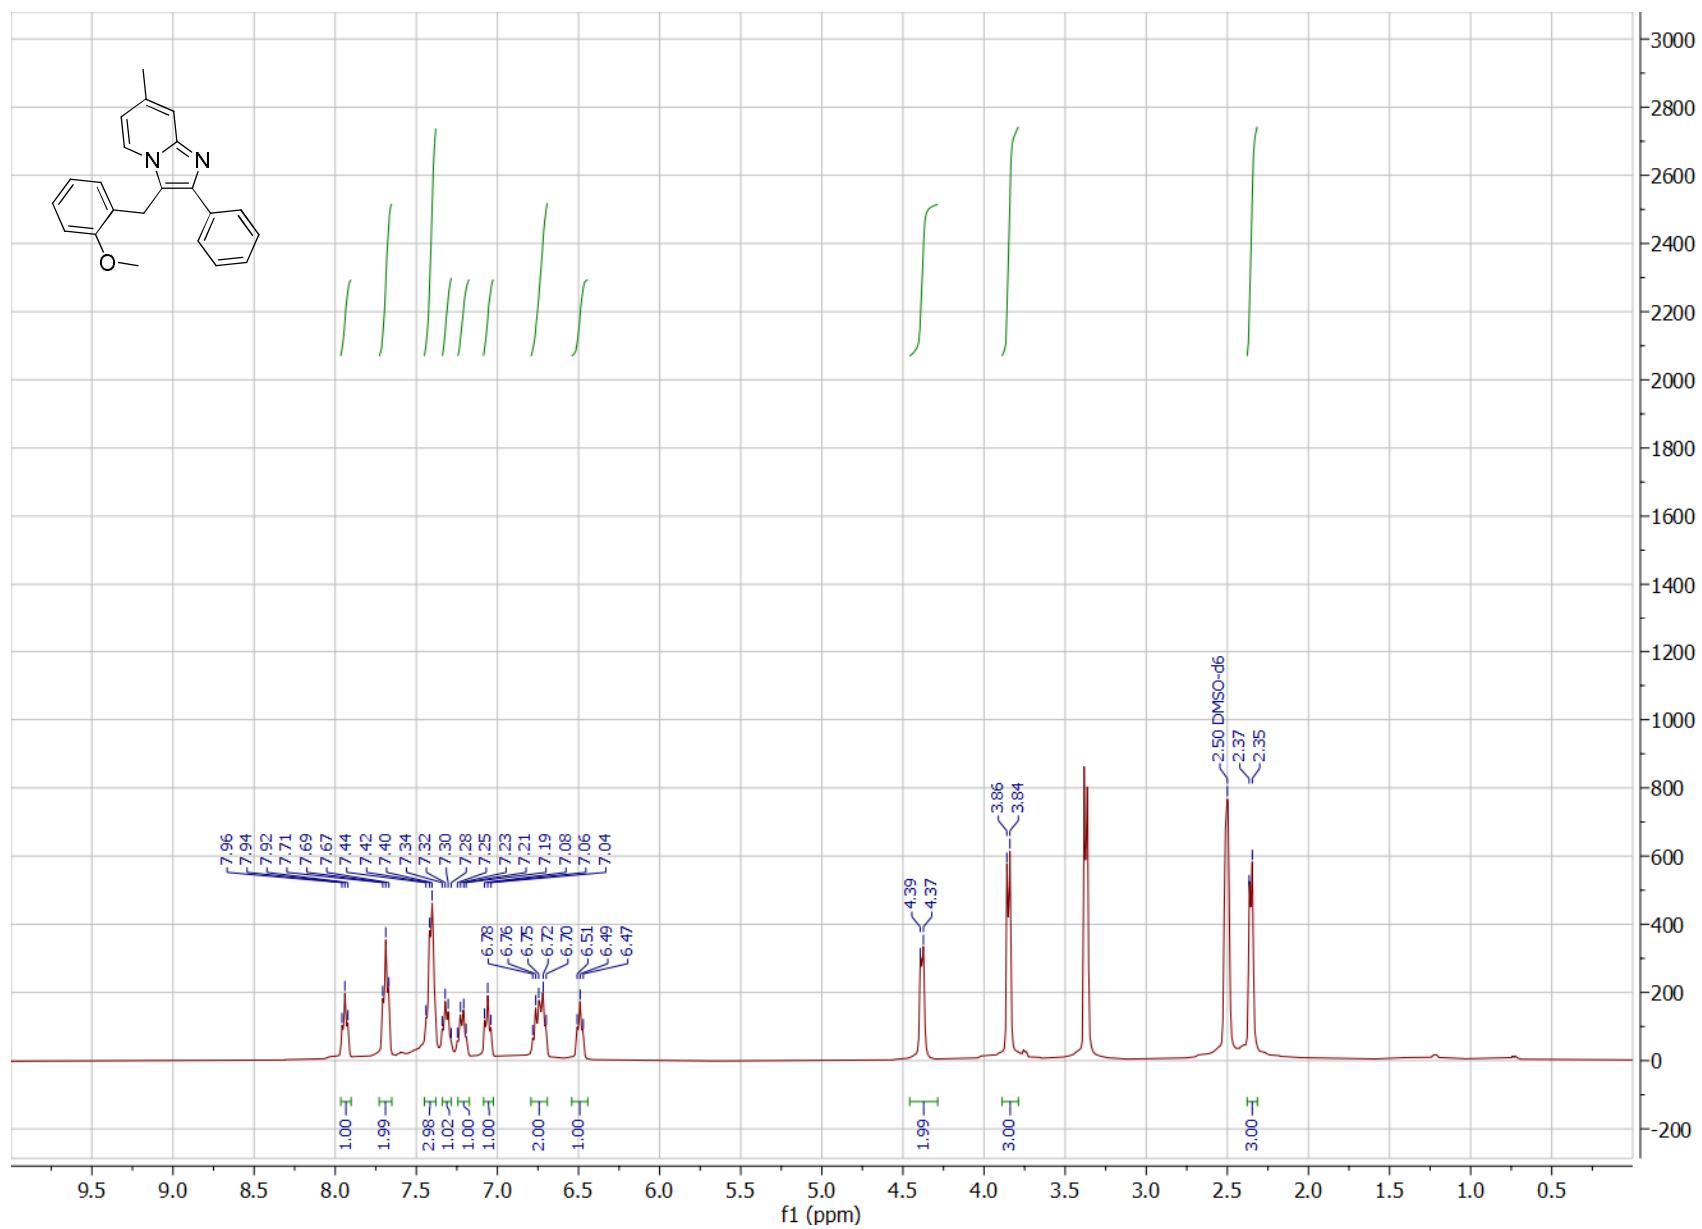

Figure S33. <sup>1</sup>H NMR spectrum of imidazo[1,2-*a*]pyridine **10agb** in DMSO-*d*<sub>6</sub> (400 MHz)

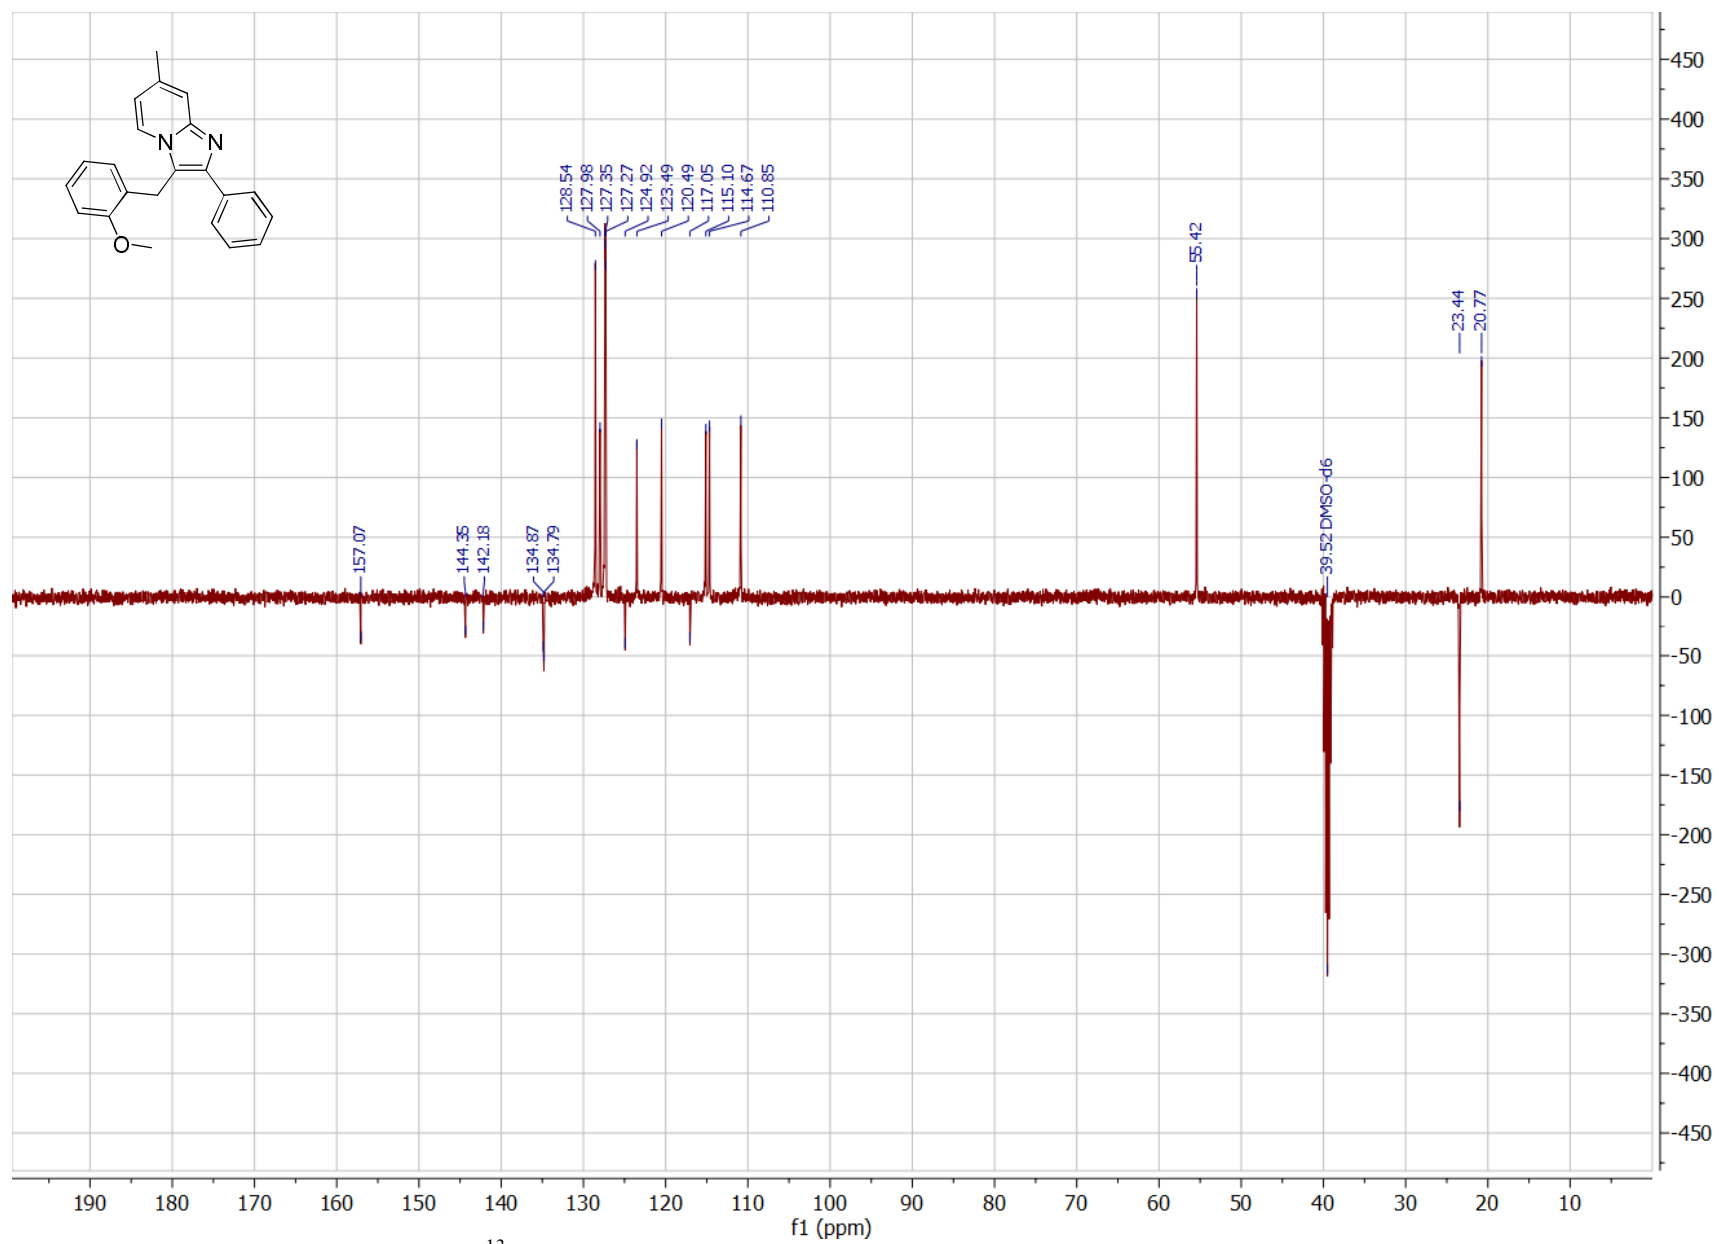

Figure S34.  $^{13}\text{C}$  NMR spectrum of imidazo[1,2-*a*]pyridine **10agb** in  $\text{DMSO-}d_6$  (101 MHz)

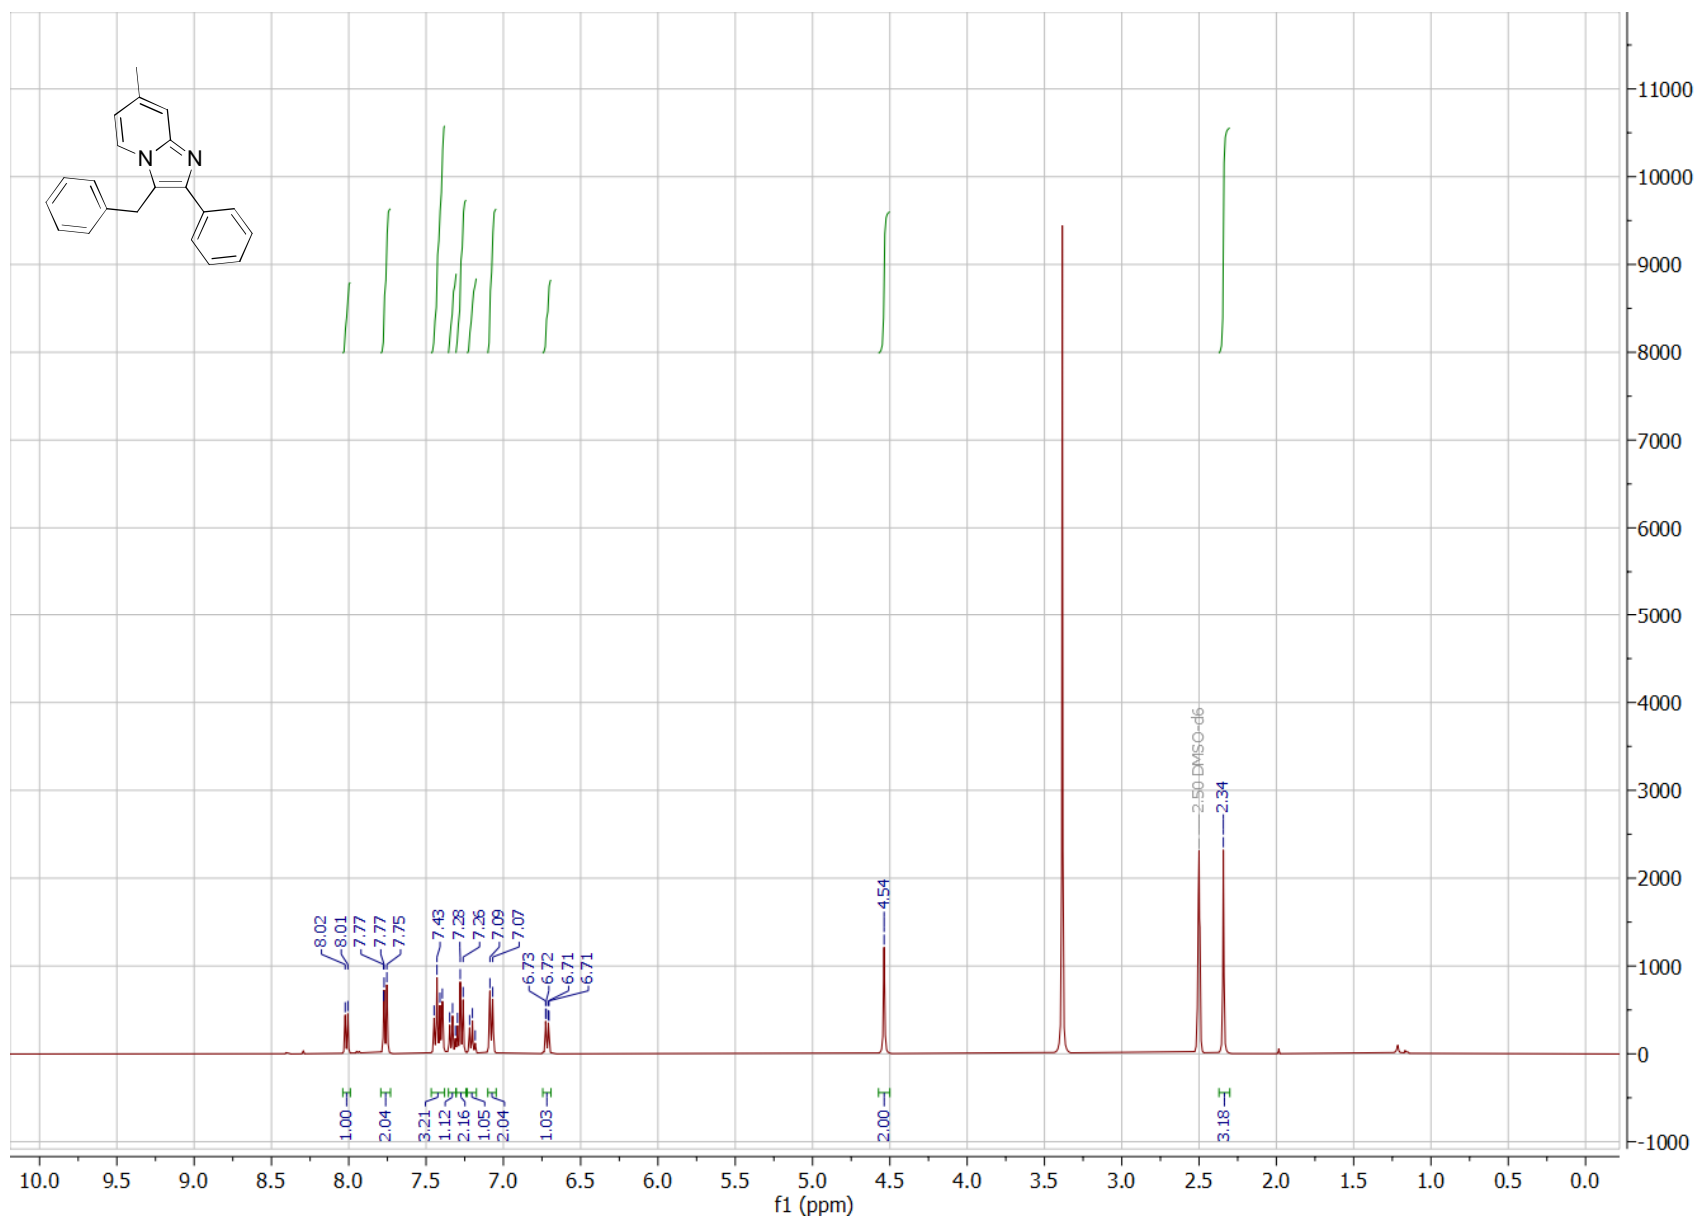

Figure S35. <sup>1</sup>H NMR spectrum of imidazo[1,2-*a*]pyridine **10aab** in DMSO-*d*<sub>6</sub> (400 MHz)

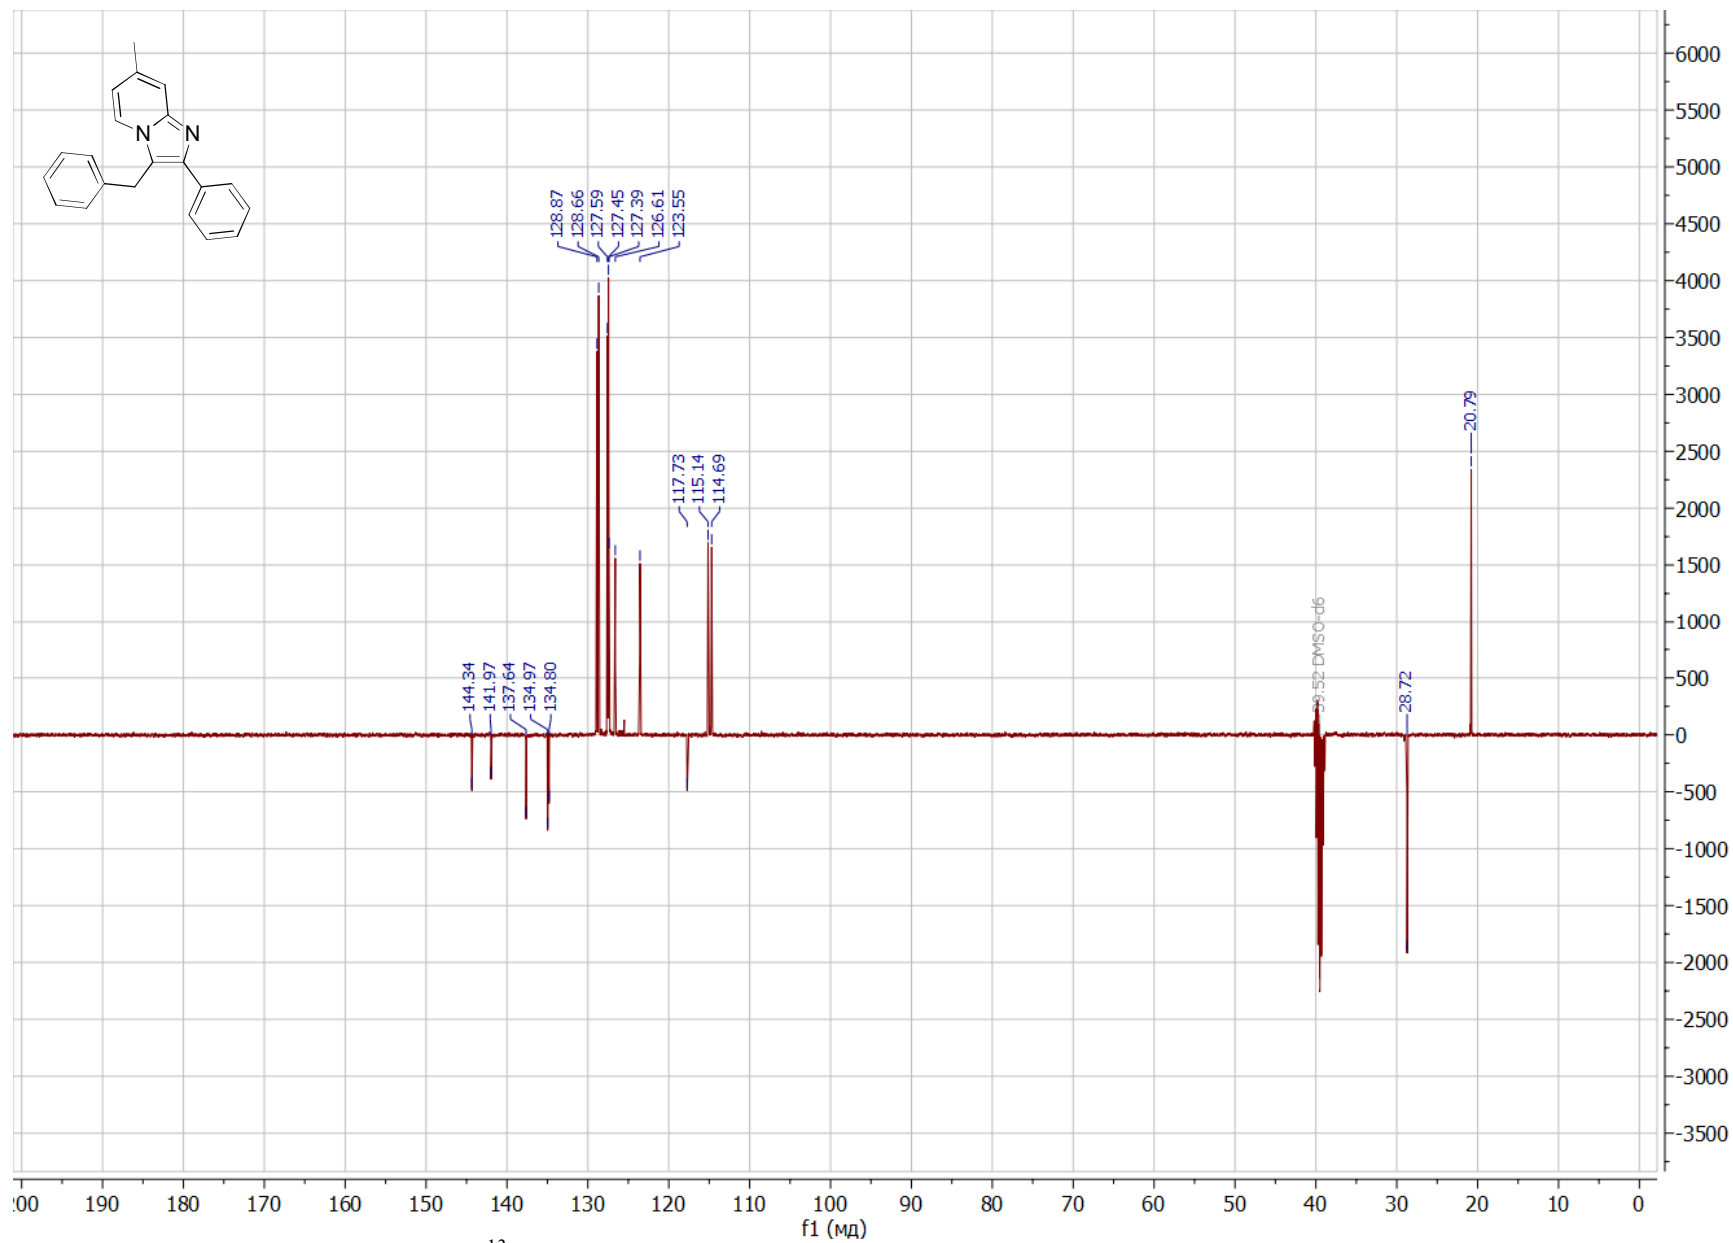

Figure S36.  $^{13}\text{C}$  NMR spectrum of imidazo[1,2-*a*]pyridine **10aab** in DMSO- $d_6$  (101 MHz)

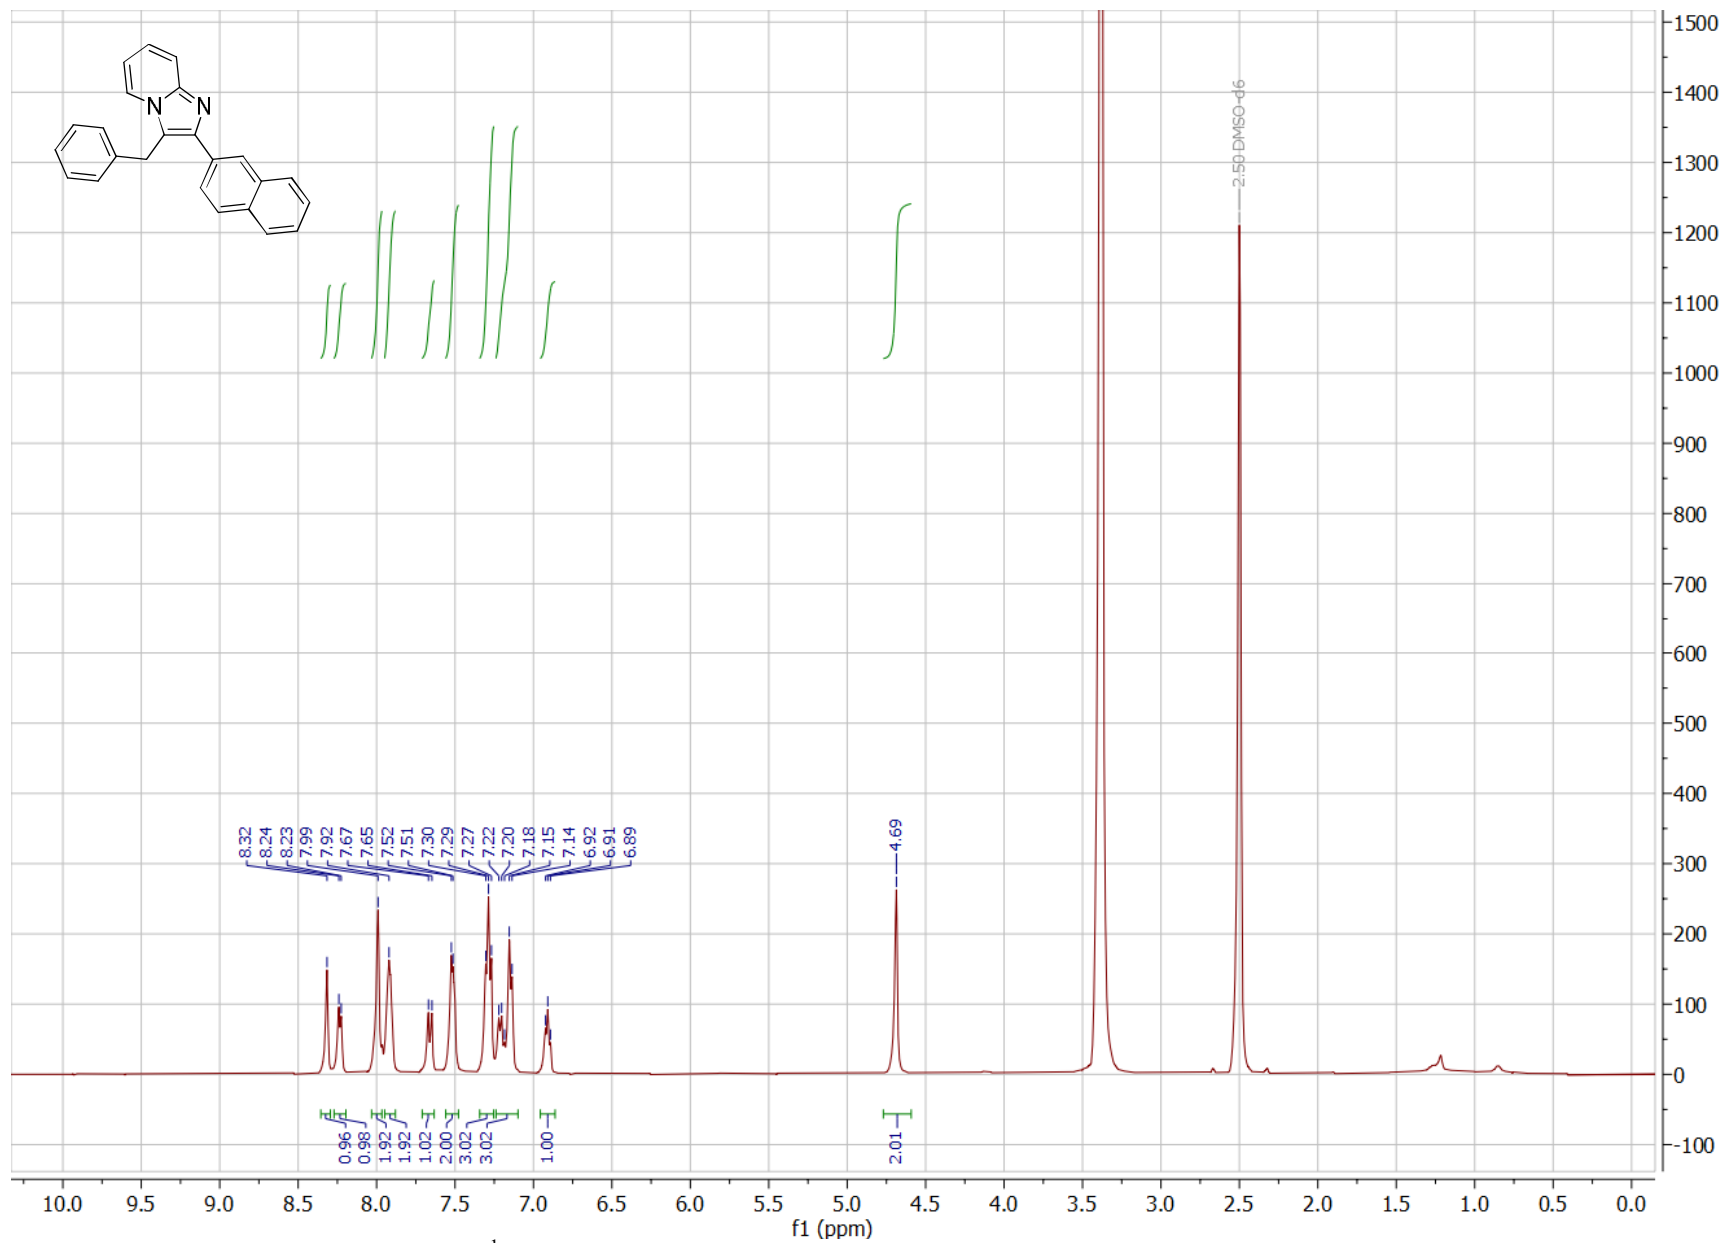

Figure S37. <sup>1</sup>H NMR spectrum of imidazo[1,2-*a*]pyridine **10daa** in DMSO-*d*<sub>6</sub> (400 MHz)

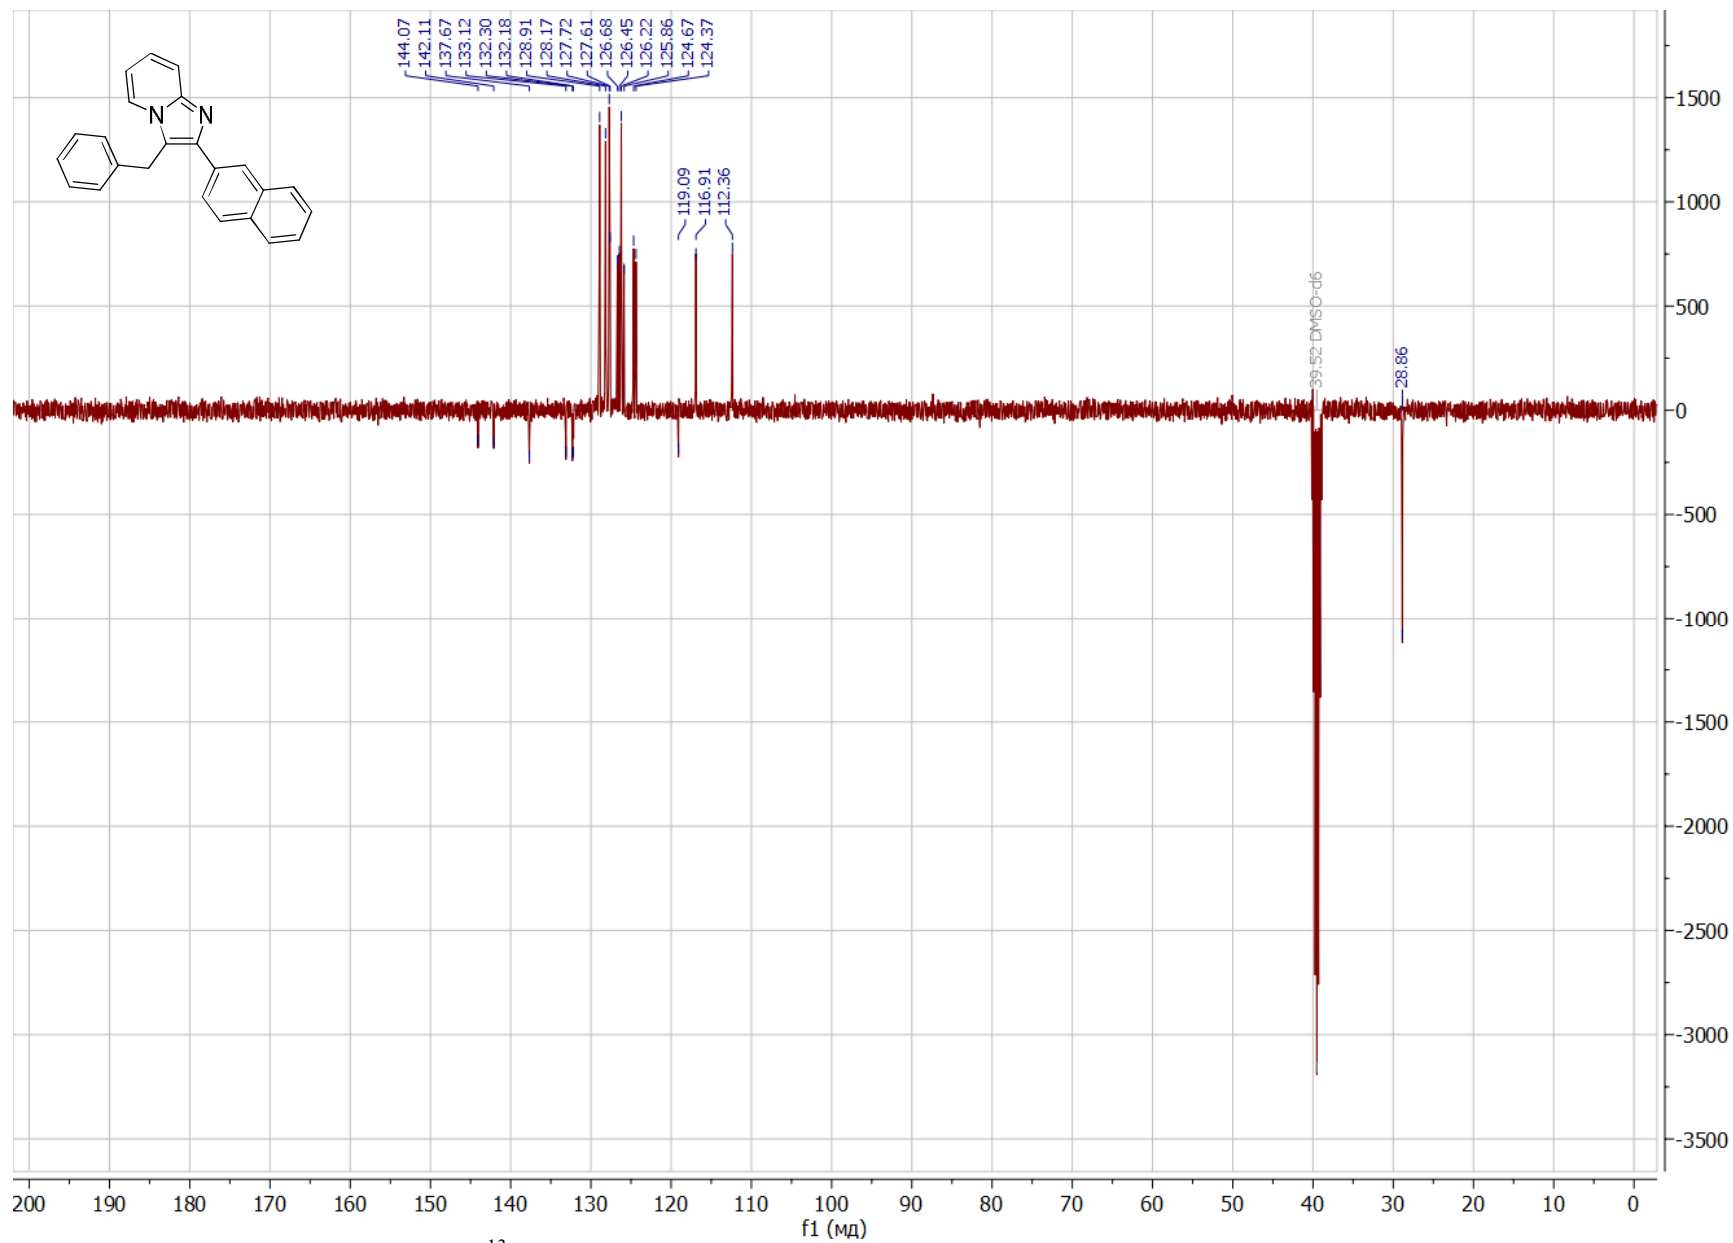

Figure S38.  $^{13}\text{C}$  NMR spectrum of imidazo[1,2-*a*]pyridine **10daa** in  $\text{DMSO-}d_6$  (101 MHz)

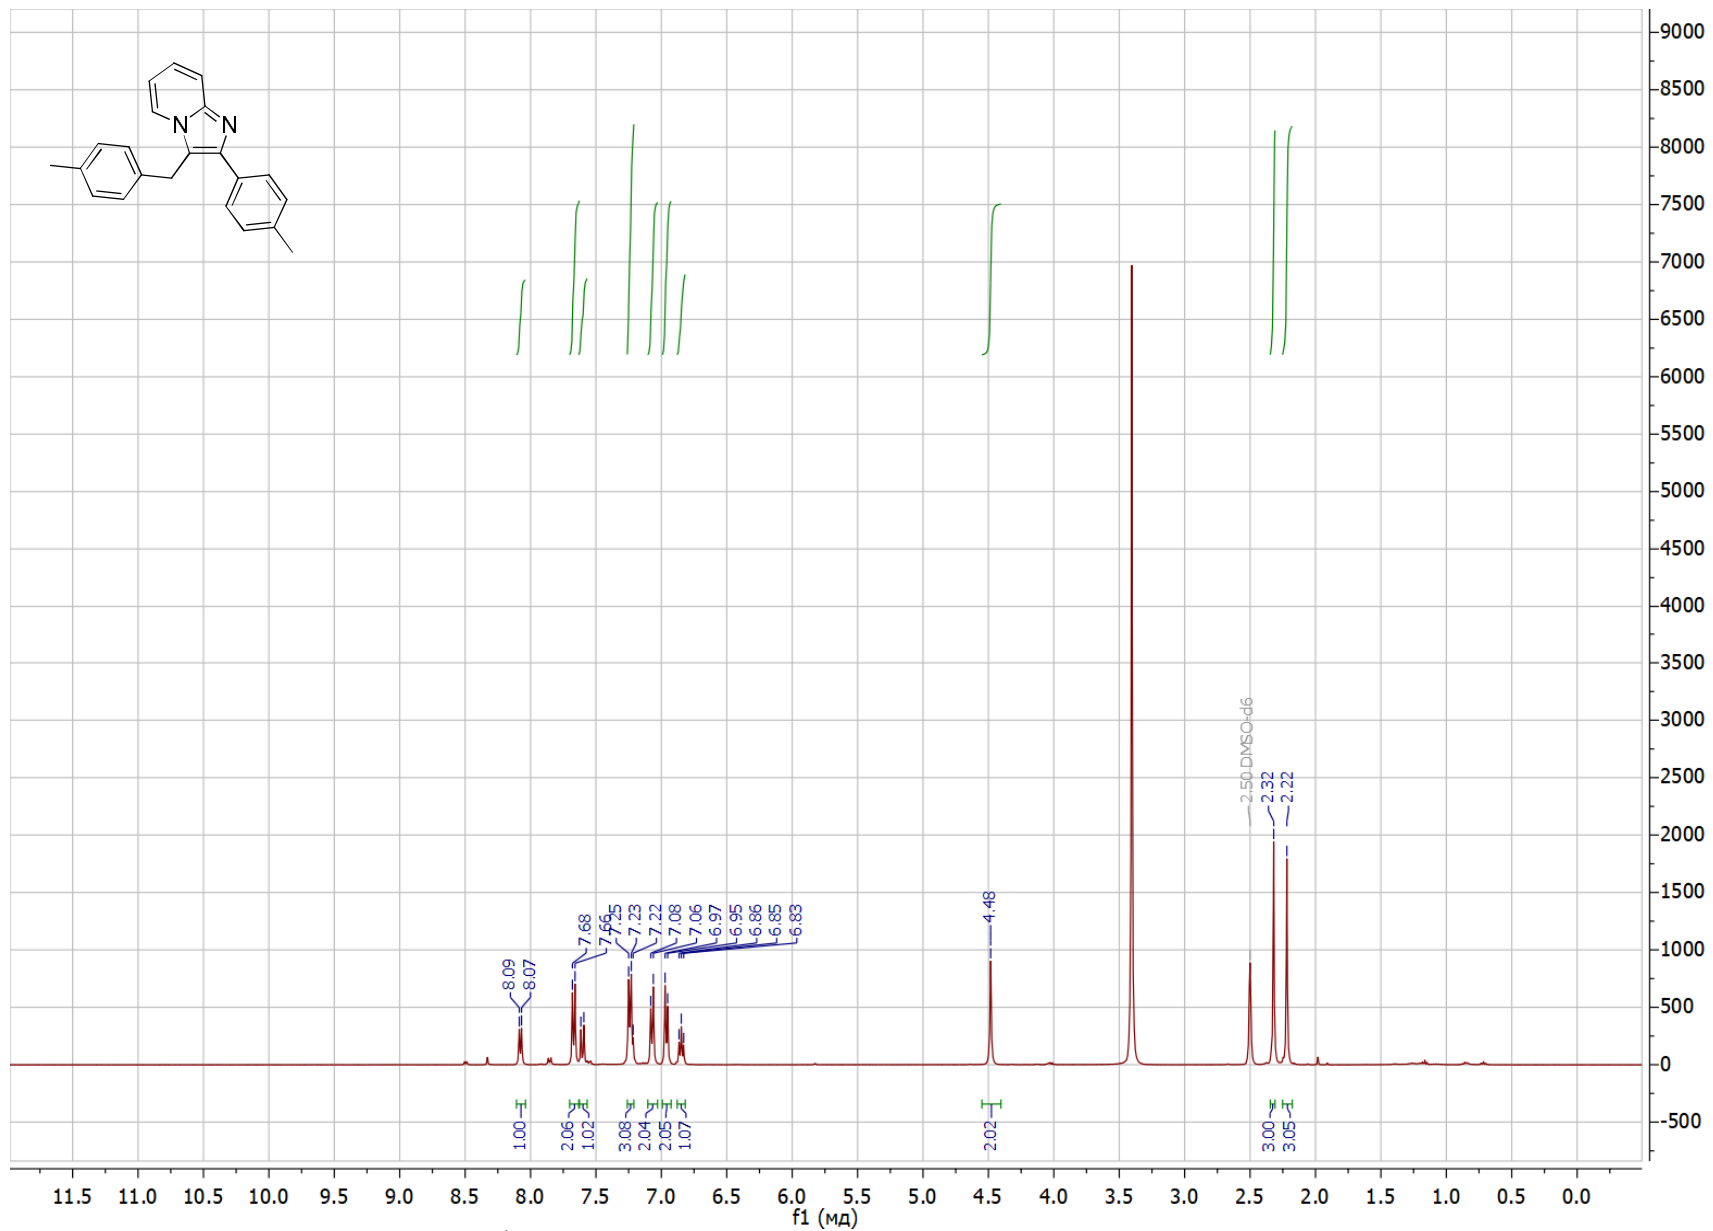

Figure S39. <sup>1</sup>H NMR spectrum of imidazo[1,2-a]pyridine **10bea** in DMSO-*d*<sub>6</sub> (400 MHz)



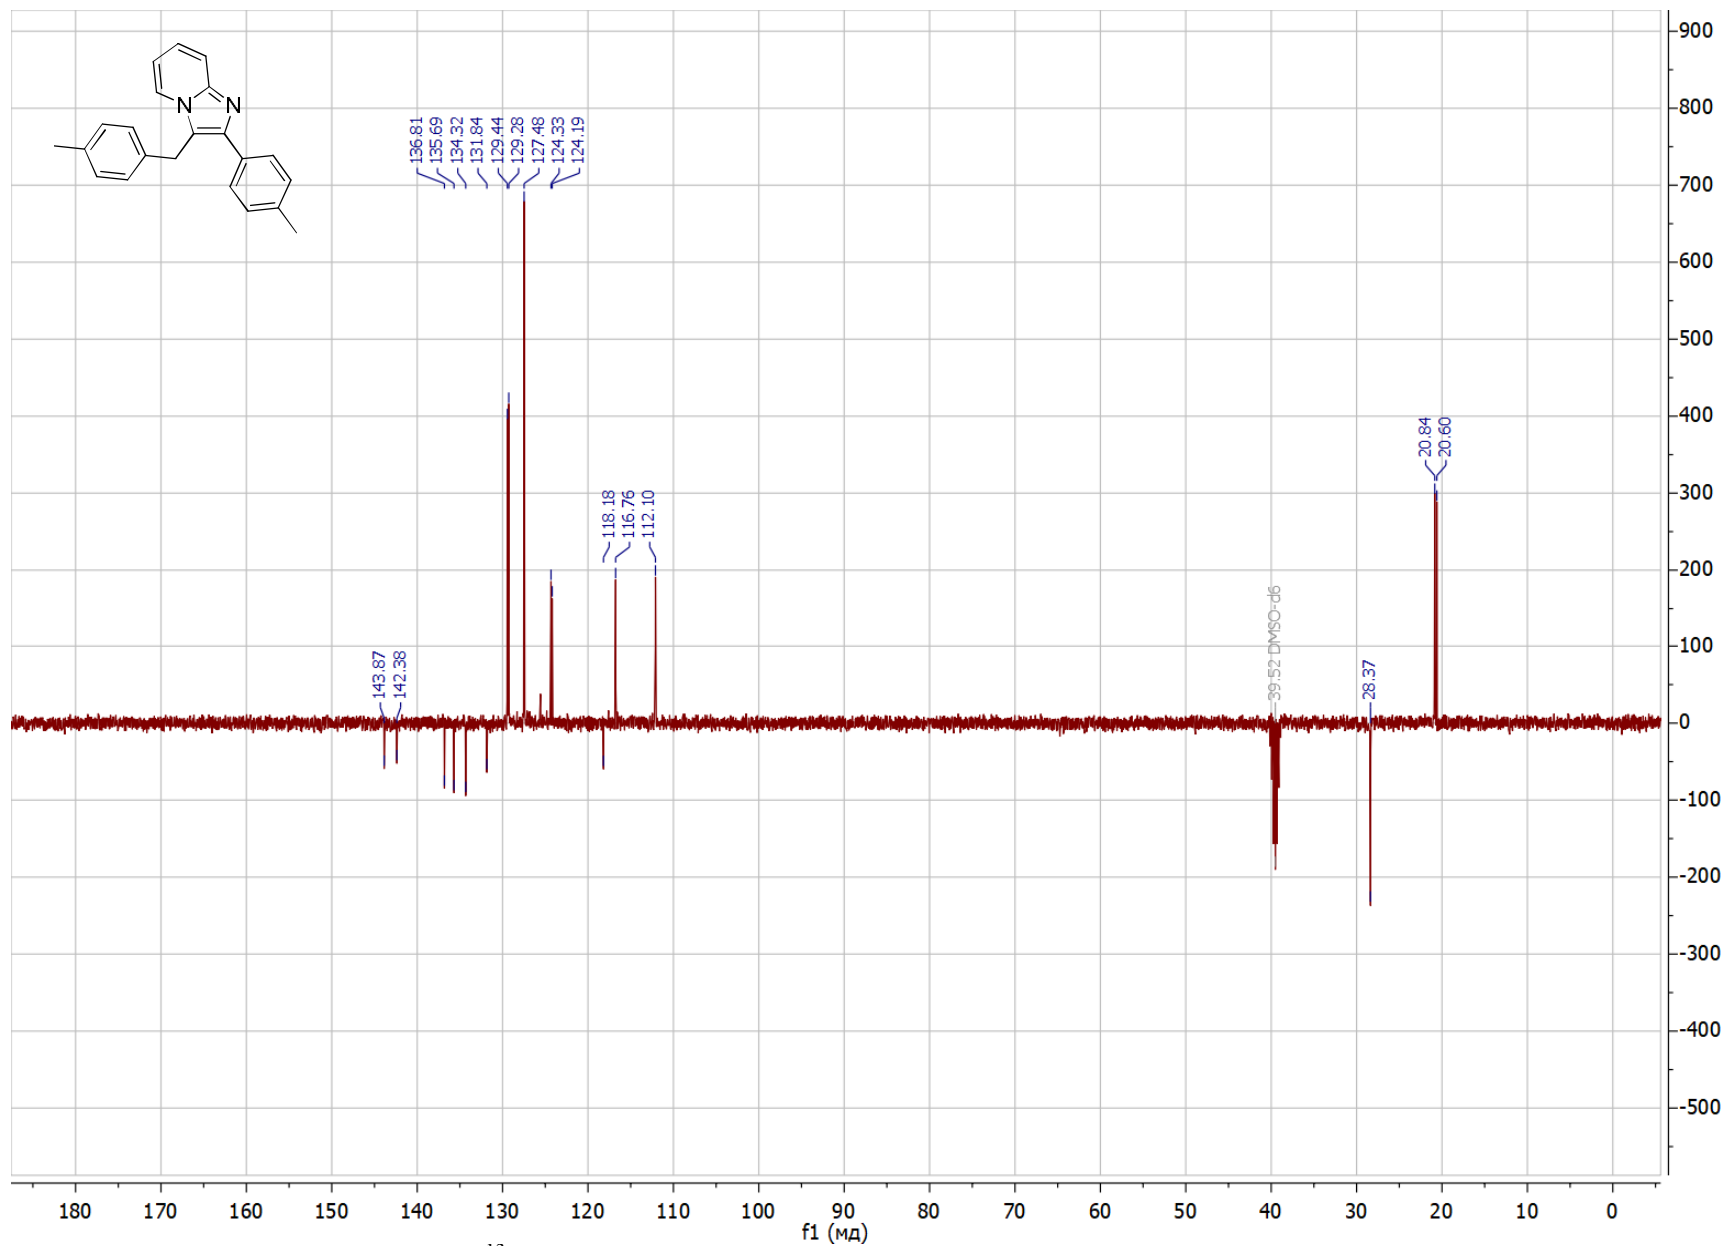

Figure S40.  $^{13}\text{C}$  NMR spectrum of imidazo[1,2-*a*]pyridine **10bea** in DMSO- $d_6$  (101 MHz)

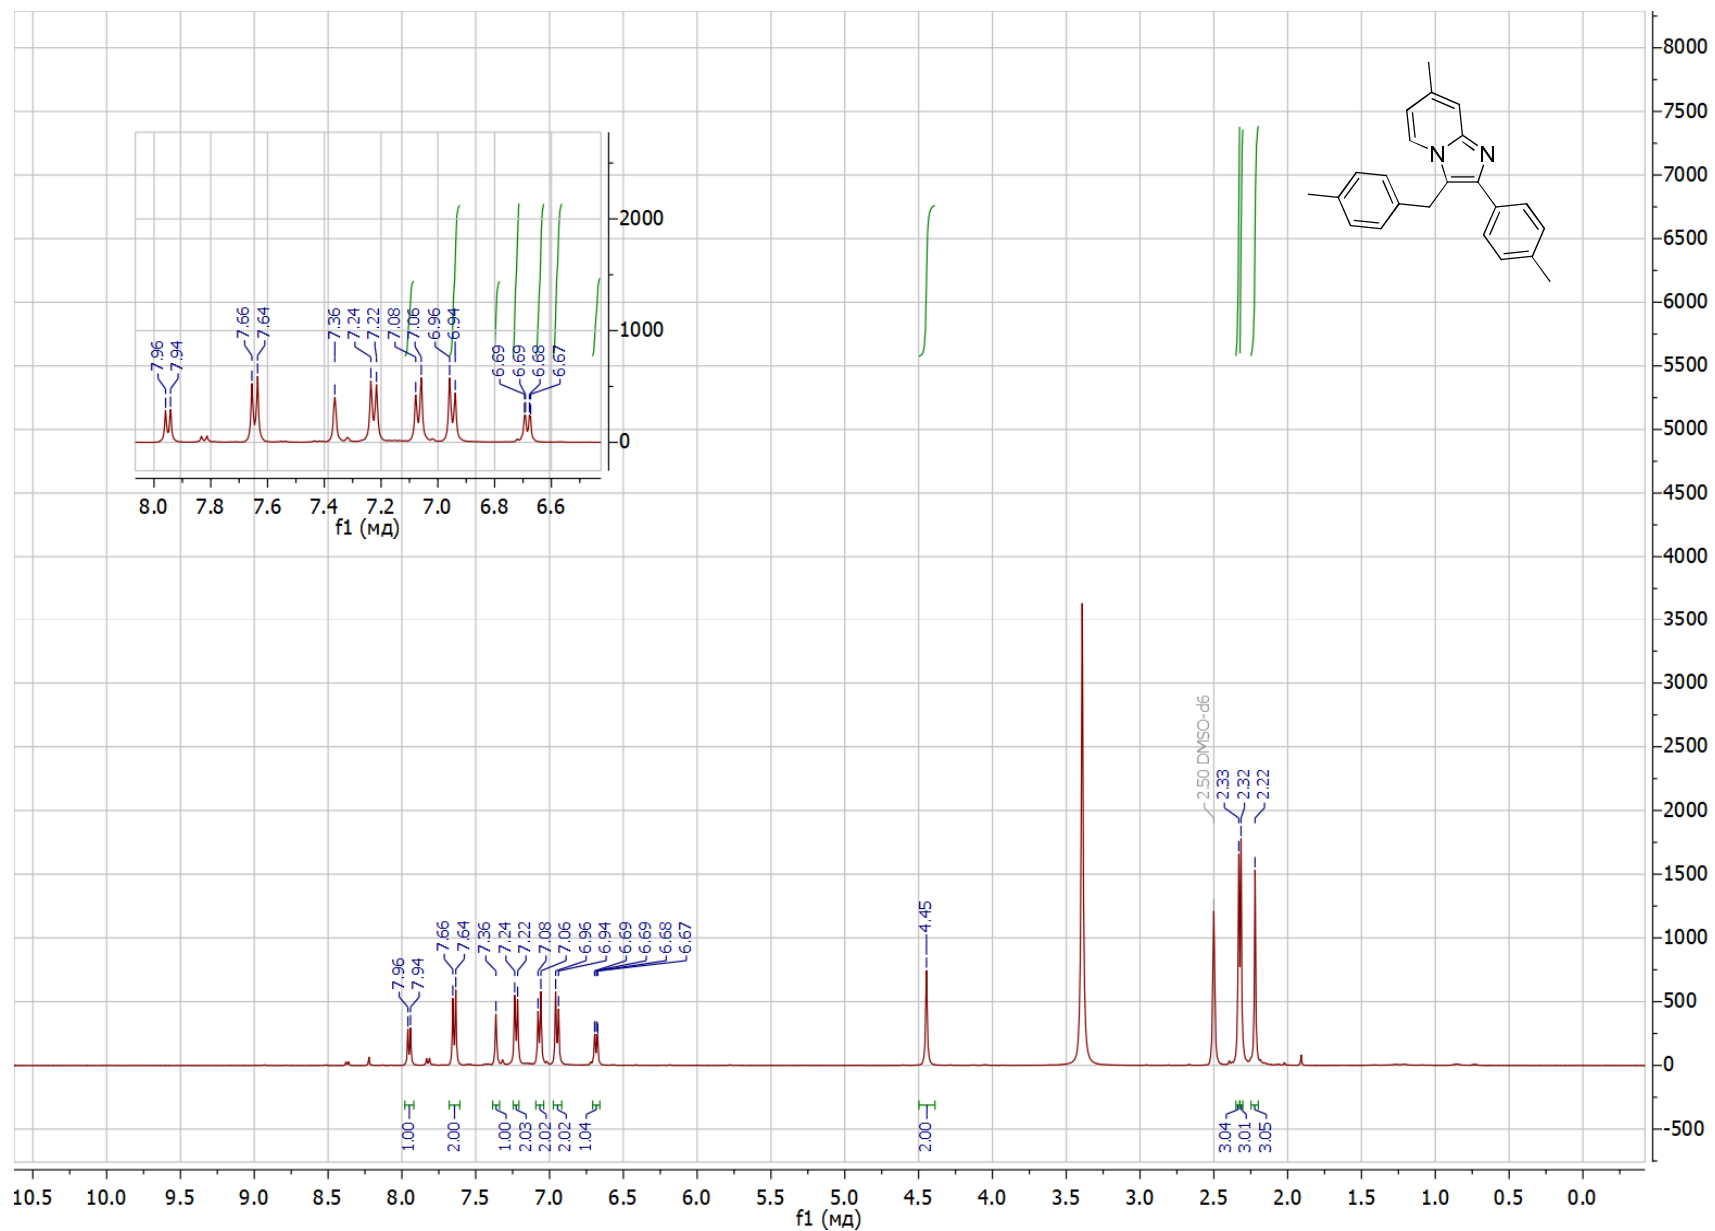

Figure S41. <sup>1</sup>H NMR spectrum of imidazo[1,2-*a*]pyridine **10beb** in DMSO-*d*<sub>6</sub> (400 MHz)

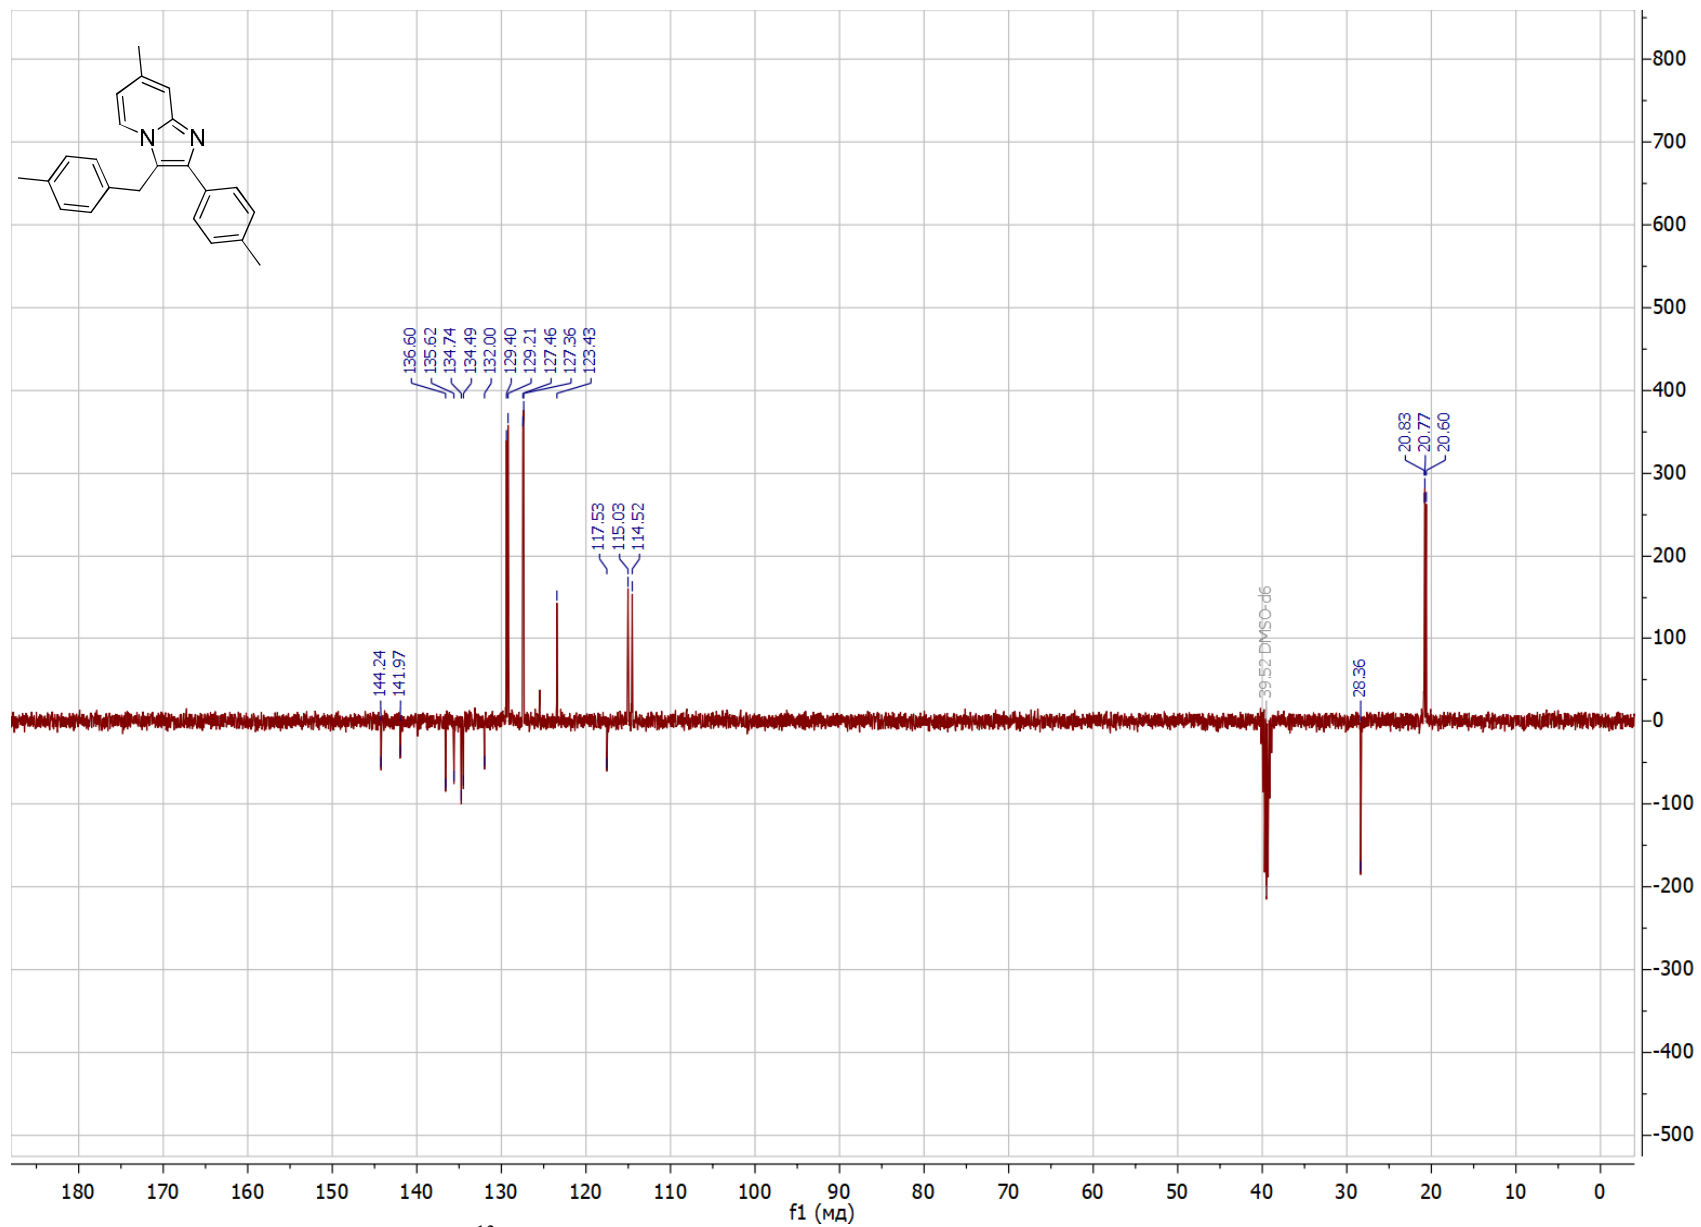

Figure S42.  $^{13}\text{C}$  NMR spectrum of imidazo[1,2-*a*]pyridine **10beb** in DMSO- $d_6$  (101 MHz)

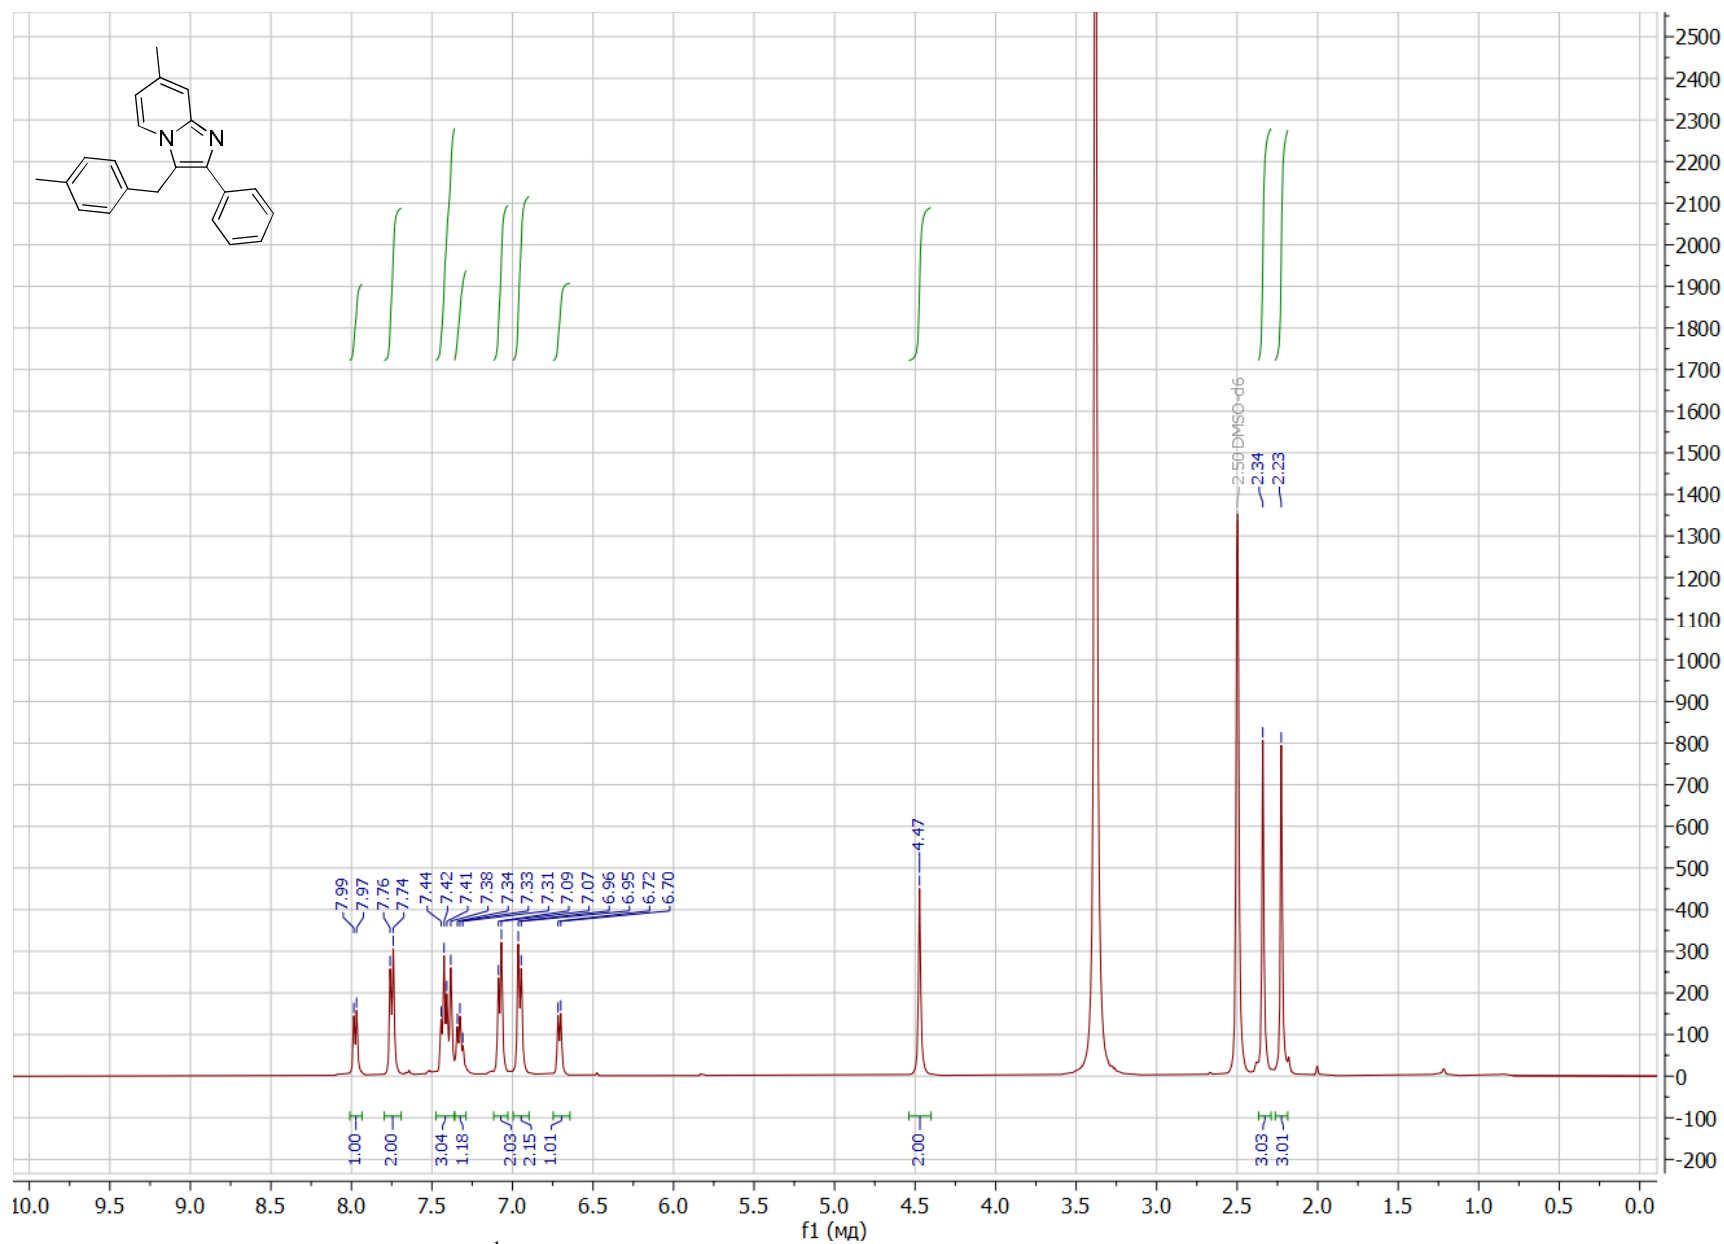

Figure S43. <sup>1</sup>H NMR spectrum of imidazo[1,2-*a*]pyridine **10aeb** in DMSO-*d*<sub>6</sub> (400 MHz)

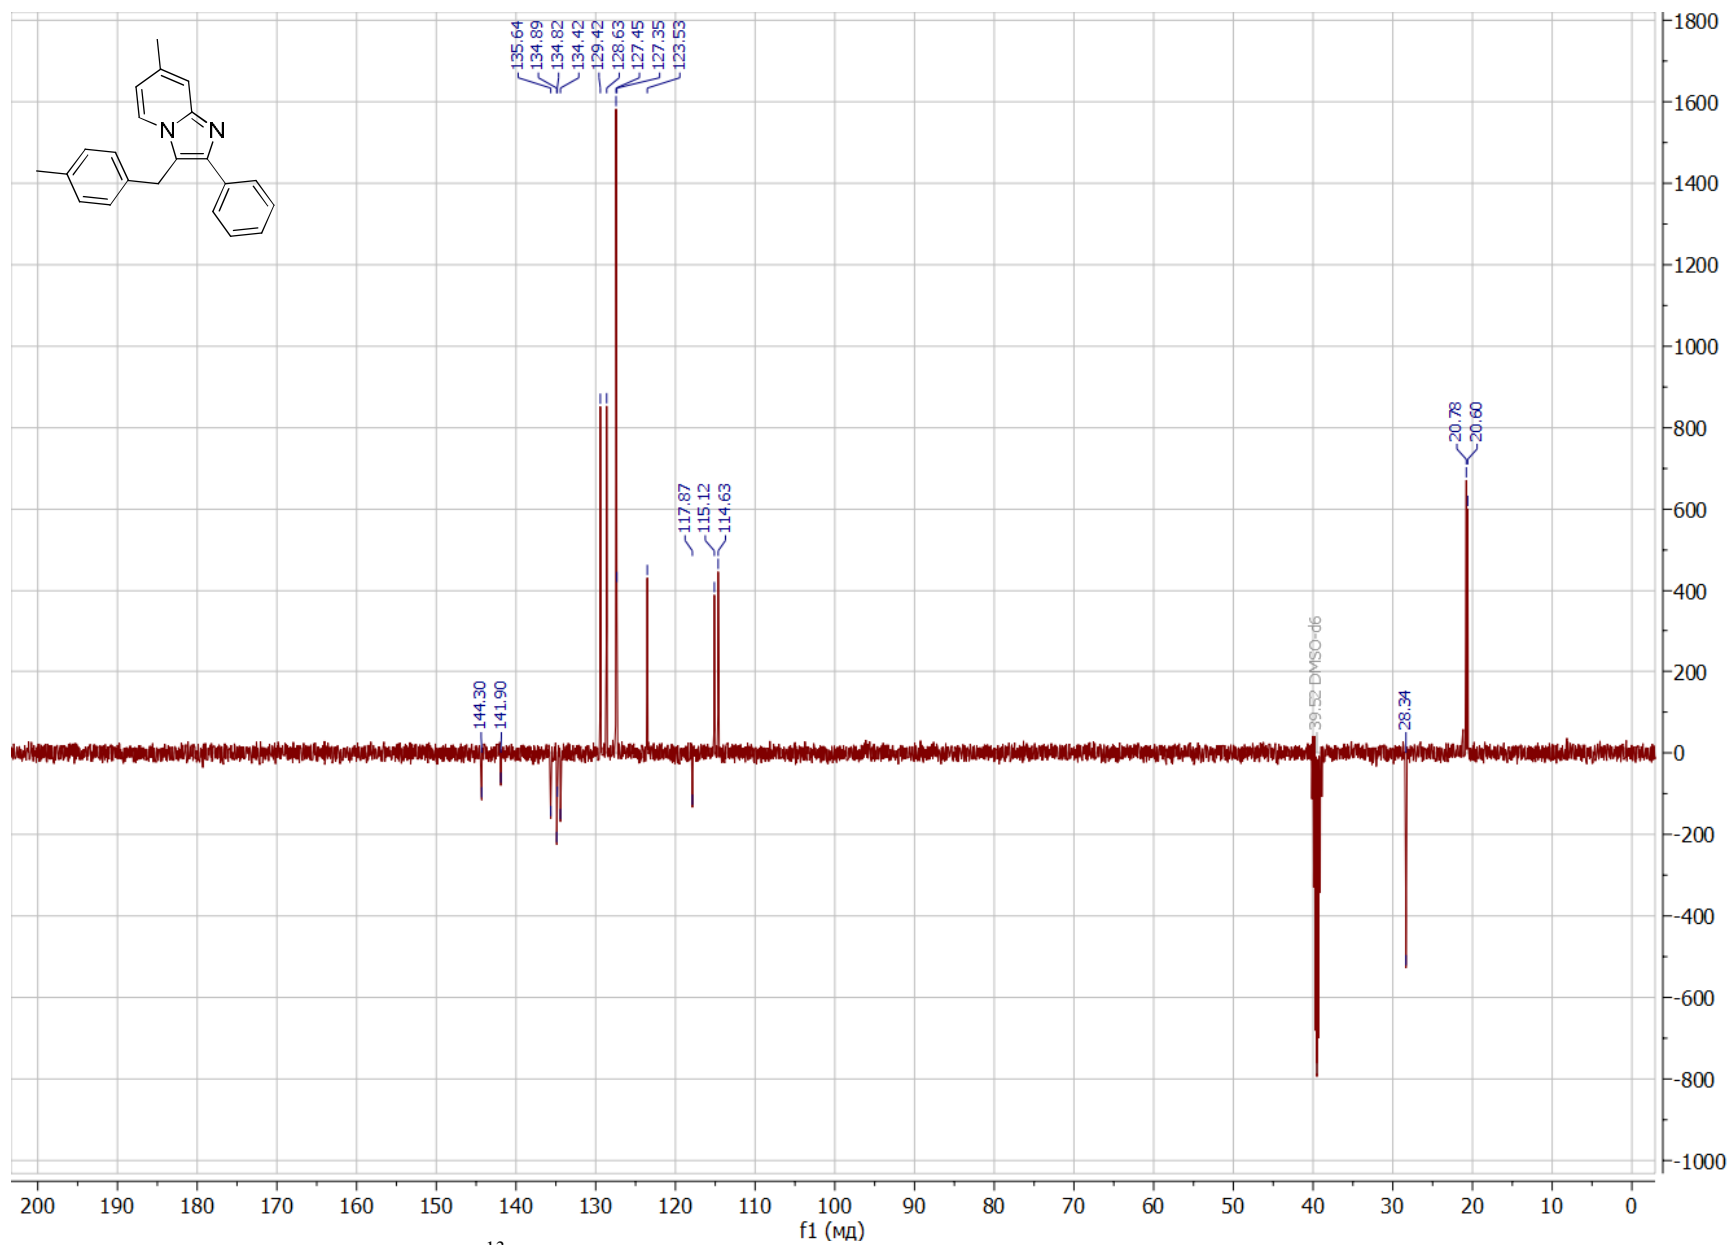

Figure S44.  $^{13}\text{C}$  NMR spectrum of imidazo[1,2-*a*]pyridine **10aeb** in DMSO- $d_6$  (101 MHz)

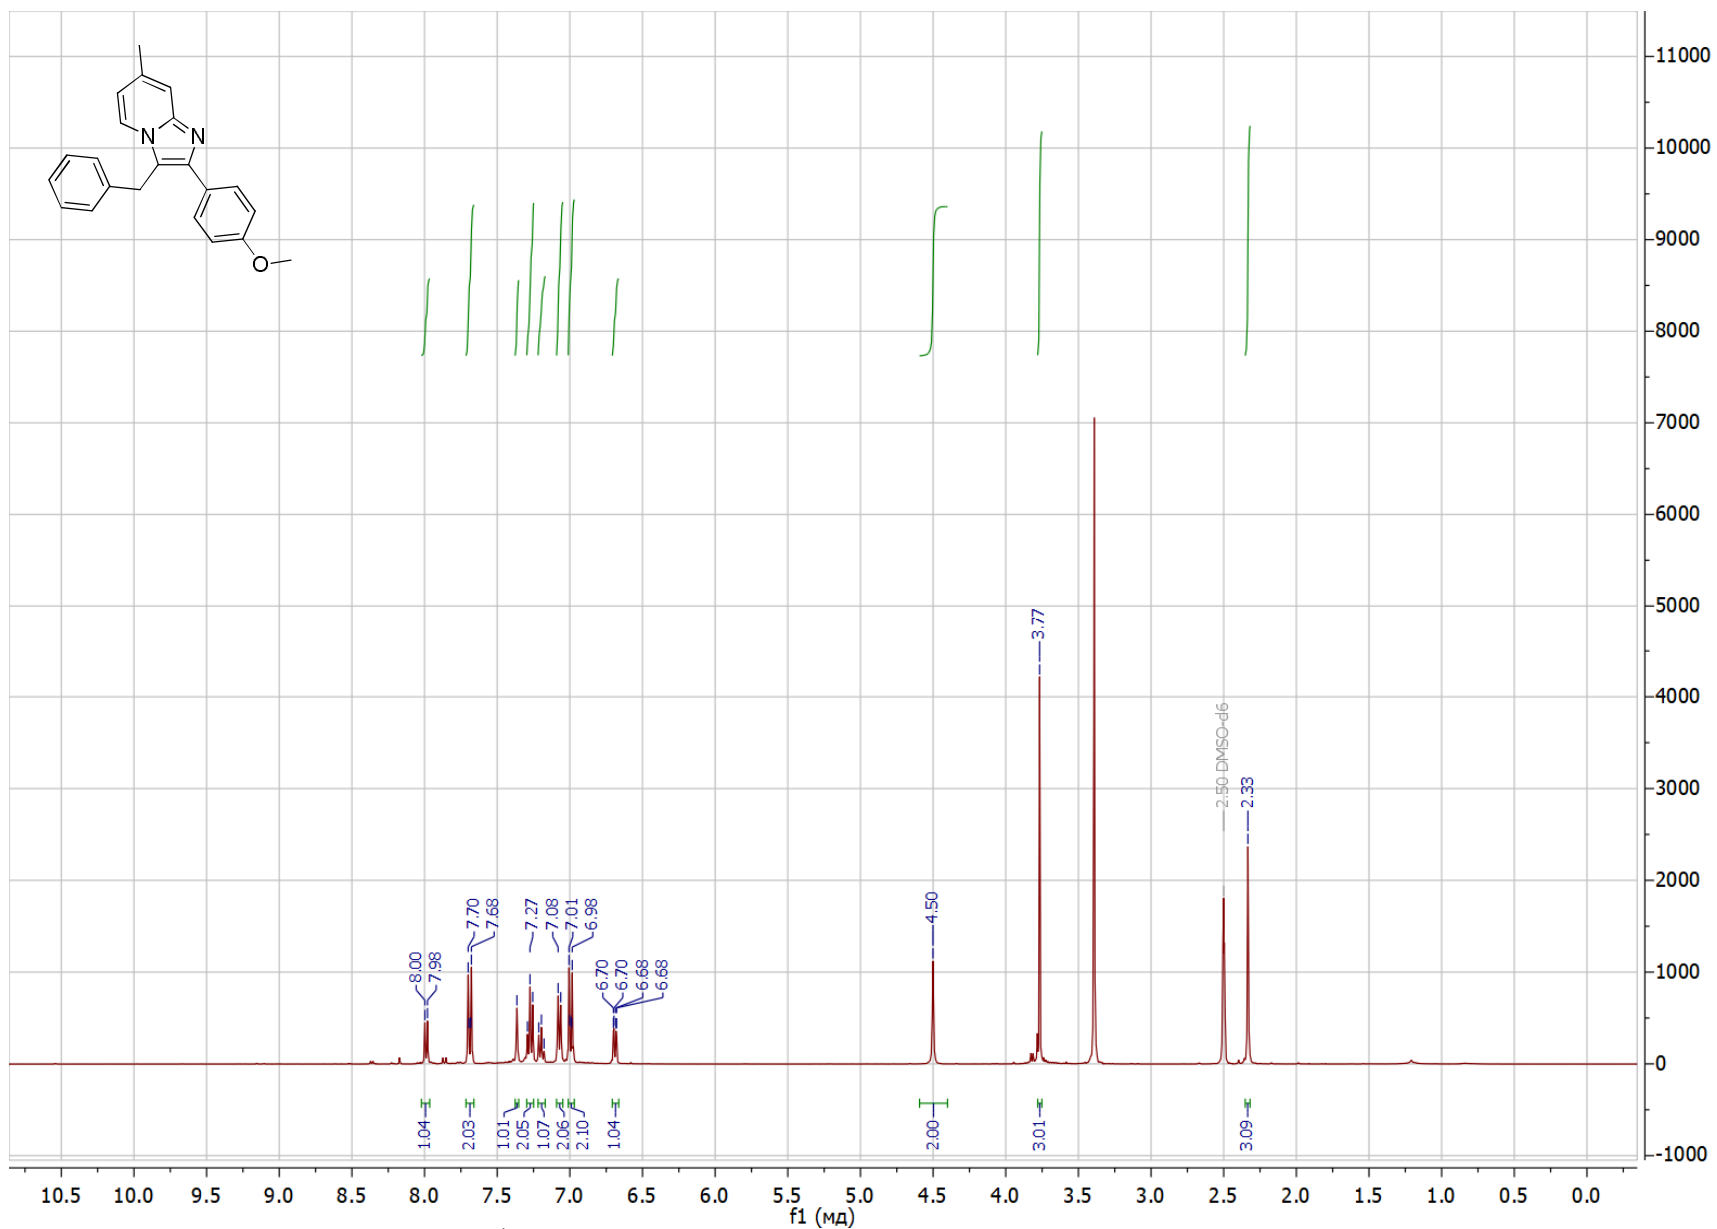

Figure S45. <sup>1</sup>H NMR spectrum of imidazo[1,2-*a*]pyridine **10cab** in DMSO-*d*<sub>6</sub> (400 MHz)

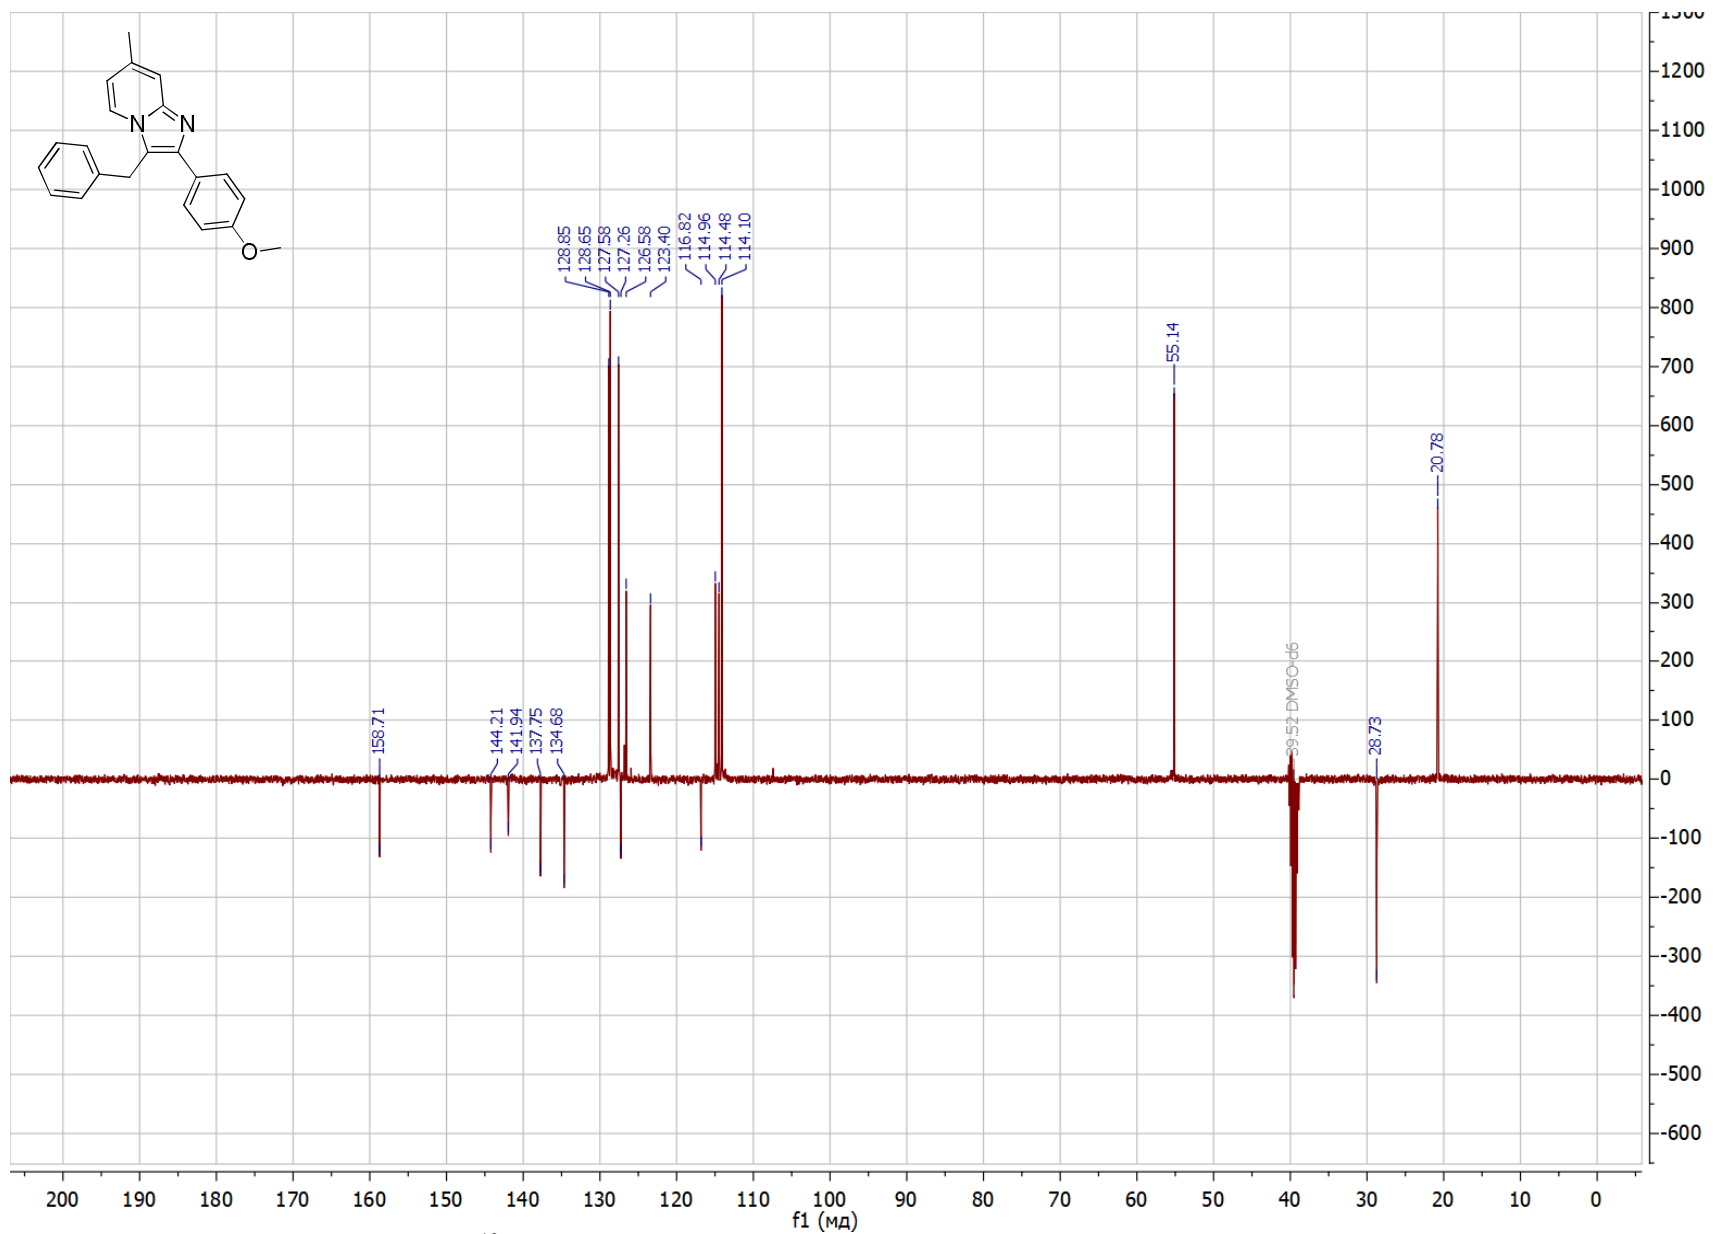

Figure S46. <sup>13</sup>C NMR spectrum of imidazo[1,2-*a*]pyridine **10cab** in DMSO-*d*<sub>6</sub> (101 MHz)

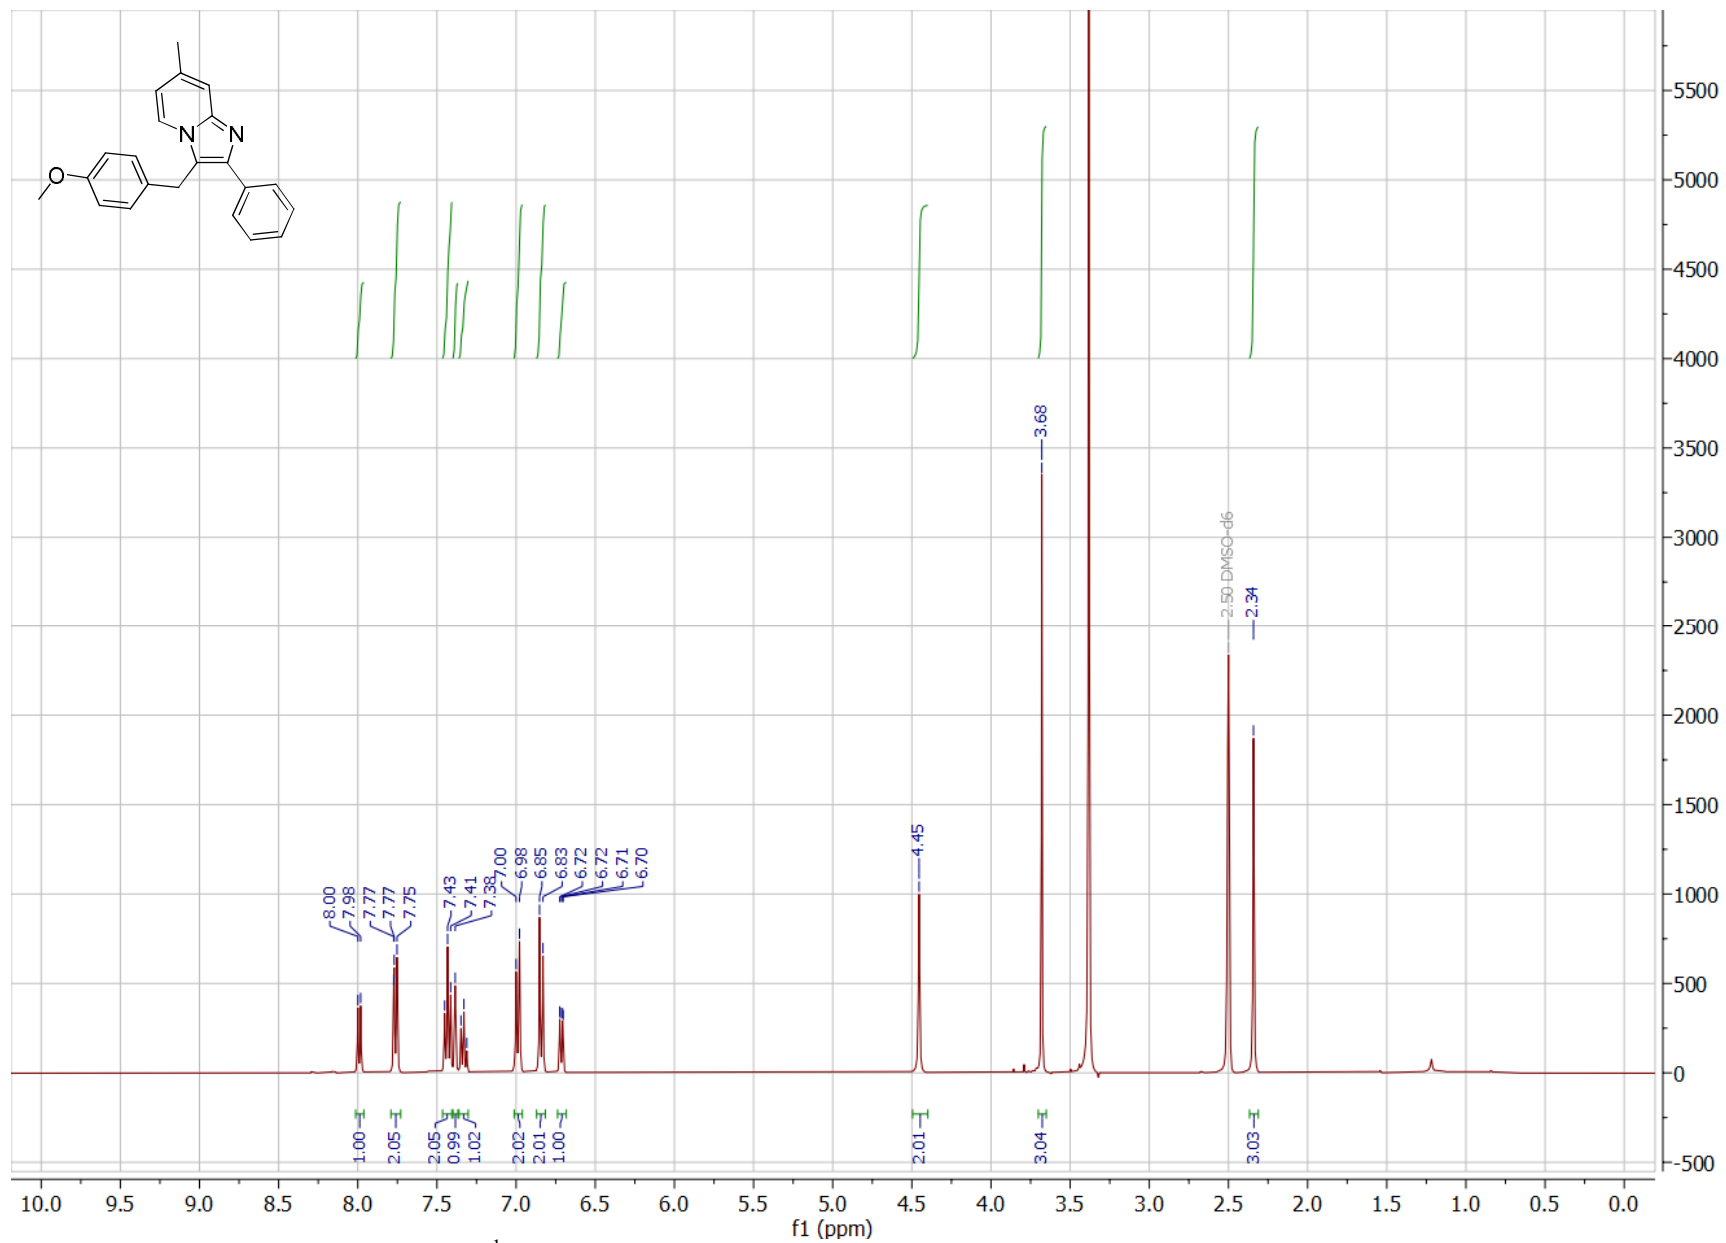

Figure S47. <sup>1</sup>H NMR spectrum of imidazo[1,2-*a*]pyridine **10afb** in DMSO-*d*<sub>6</sub> (400 MHz)



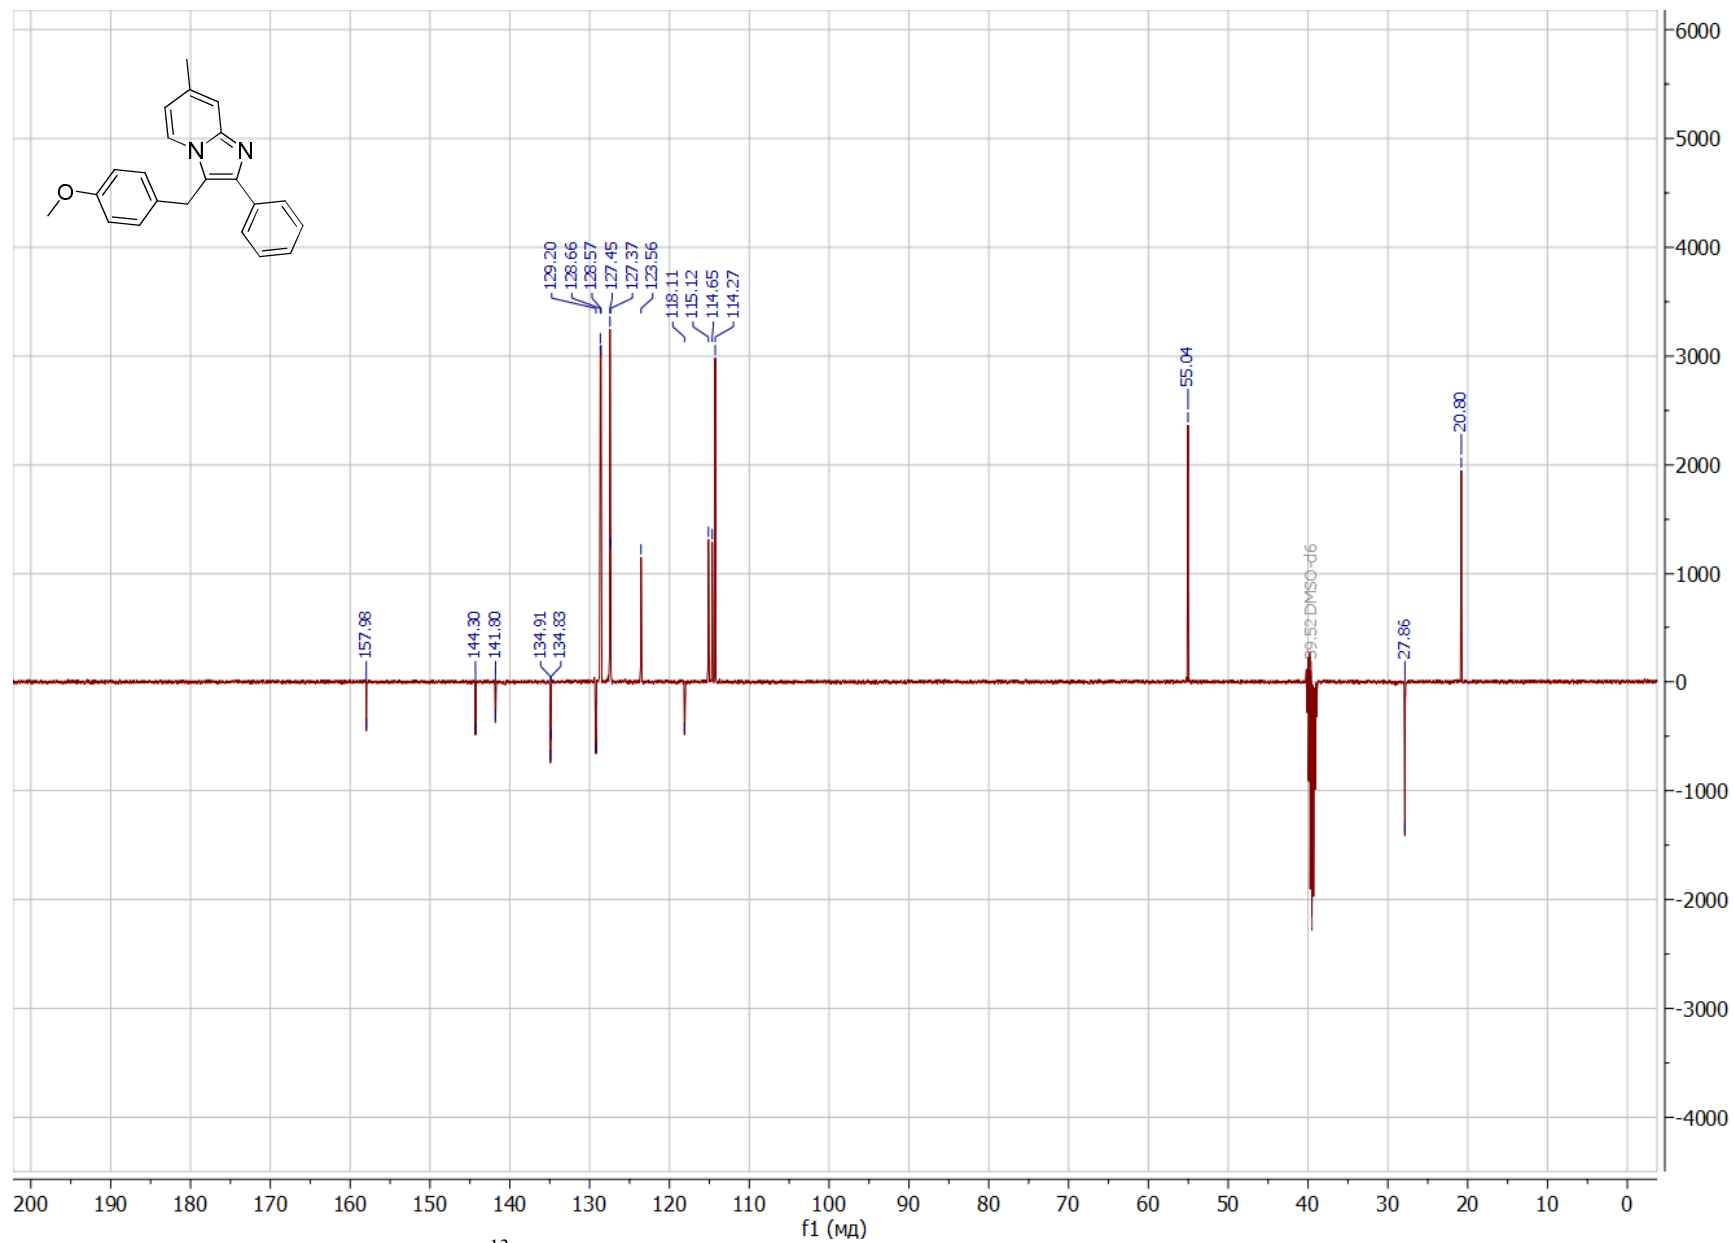

Figure S48. <sup>13</sup>C NMR spectrum of imidazo[1,2-*a*]pyridine **10afb** in DMSO-*d*<sub>6</sub> (101 MHz)

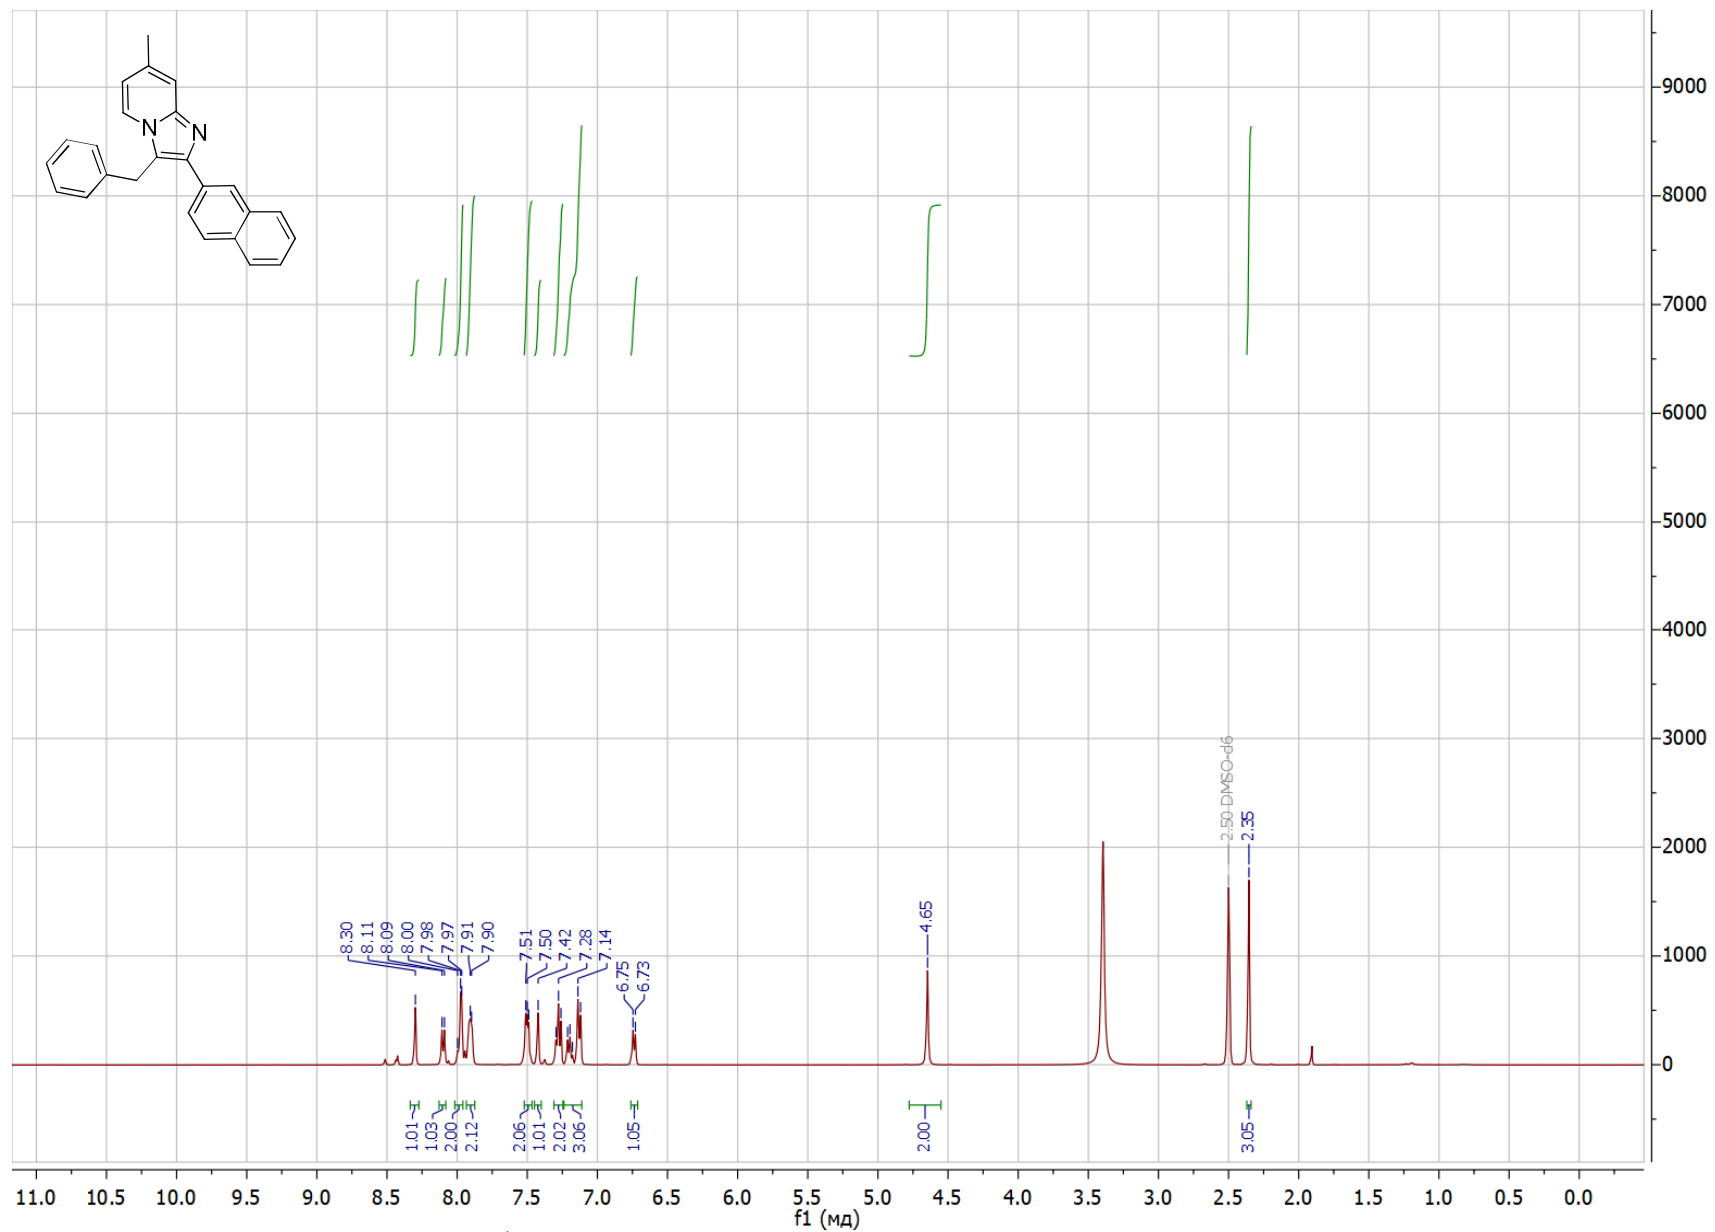

Figure S49.  $^1\text{H}$  NMR spectrum of imidazo[1,2-*a*]pyridine **10dab** in  $\text{DMSO}-d_6$  (400 MHz)

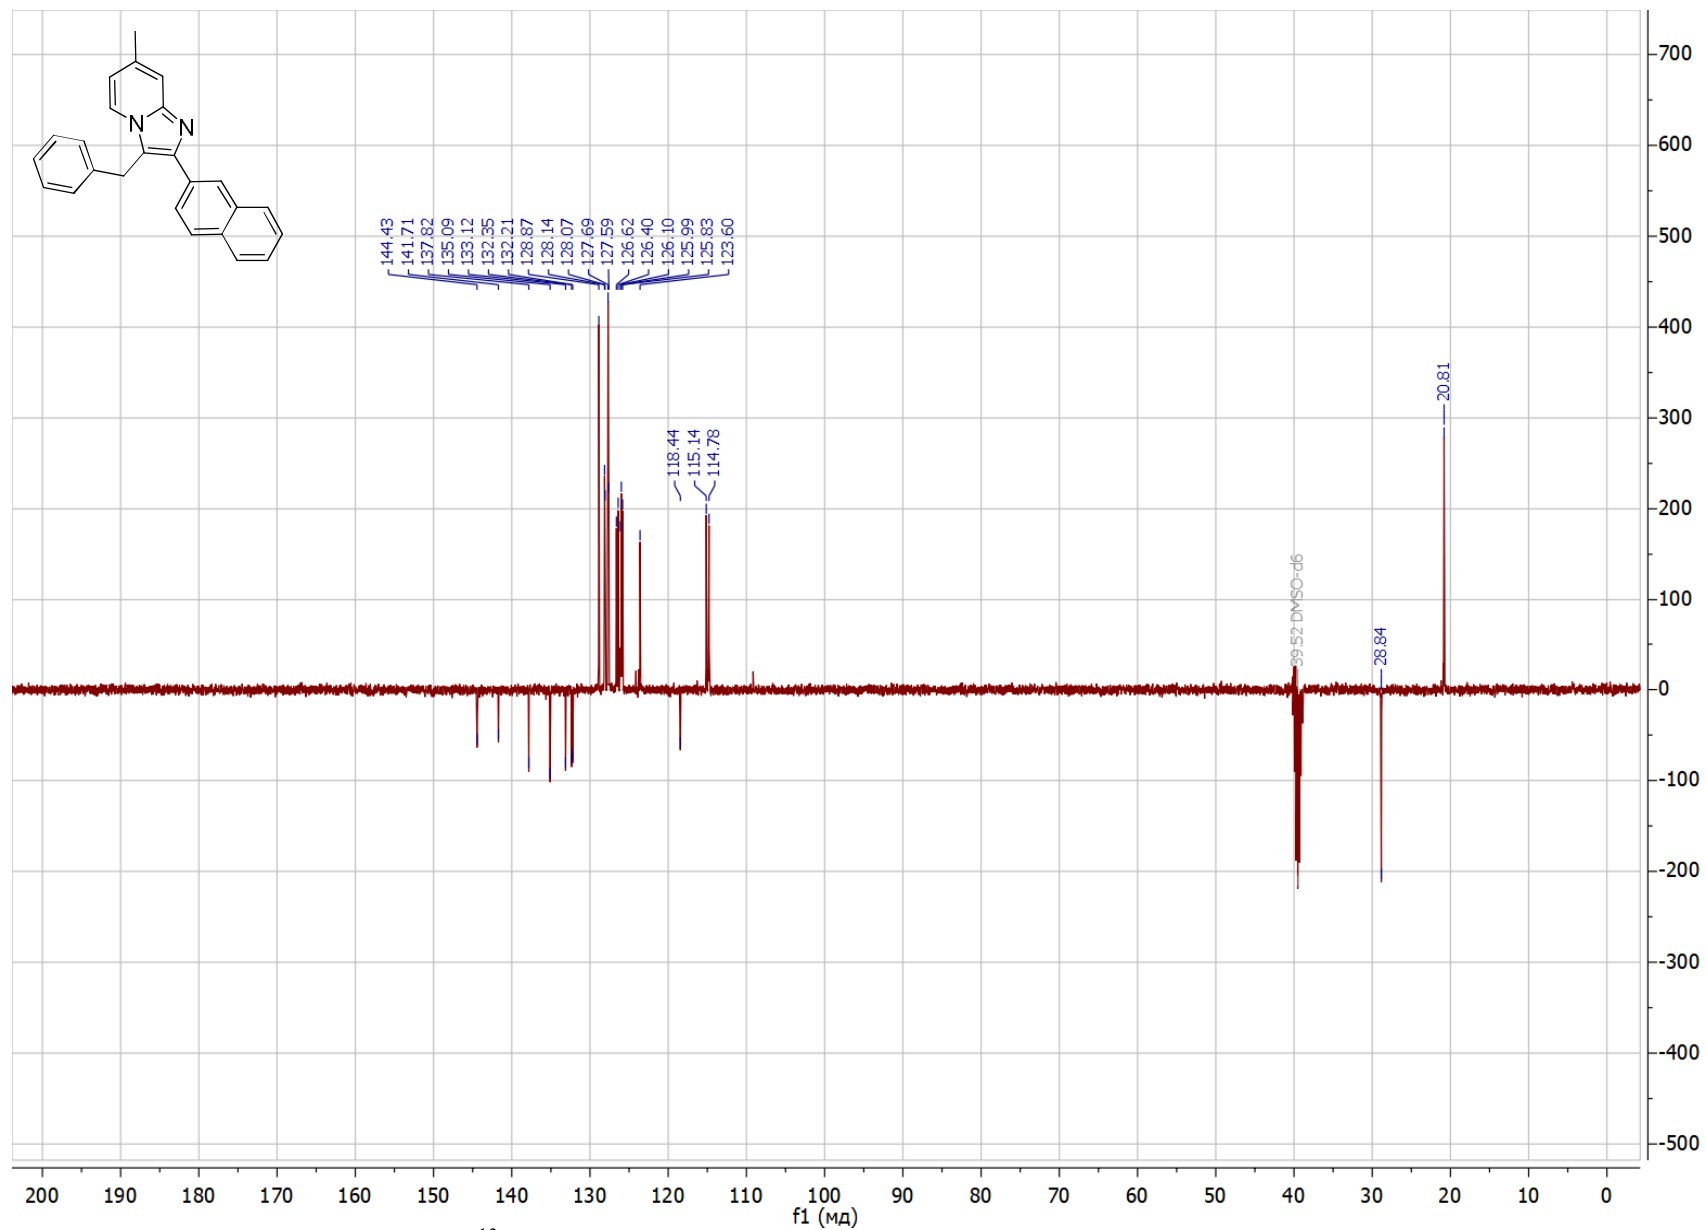

Figure S50.  $^{13}\text{C}$  NMR spectrum of imidazo[1,2-*a*]pyridine **10dab** in DMSO- $d_6$  (101 MHz)

**<sup>1</sup>H and <sup>13</sup>C NMR spectral charts for 3,5-diphenyl-3H-pyrrol-2-one 15aa**

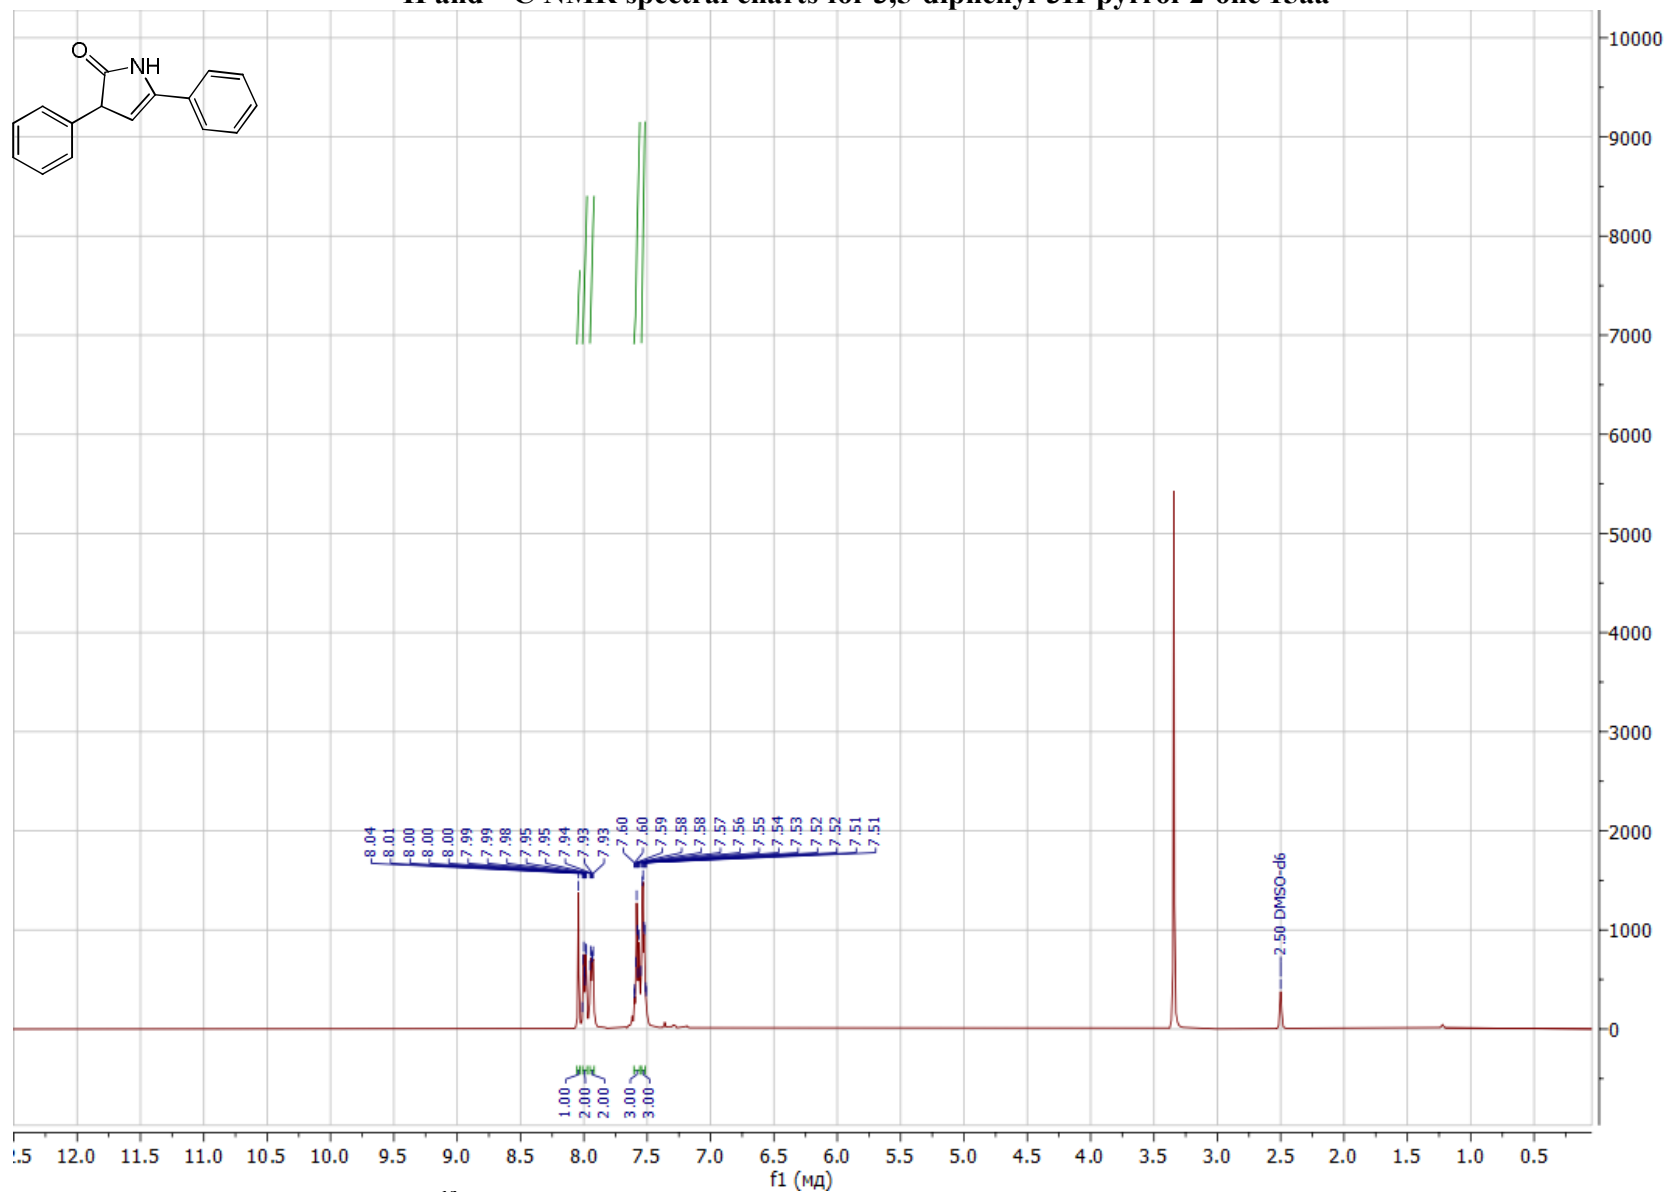

Figure S51. <sup>13</sup>C NMR spectrum of 3,5-diphenyl-3H-pyrrol-2-one **15aa** in DMSO-*d*<sub>6</sub> (101 MHz)

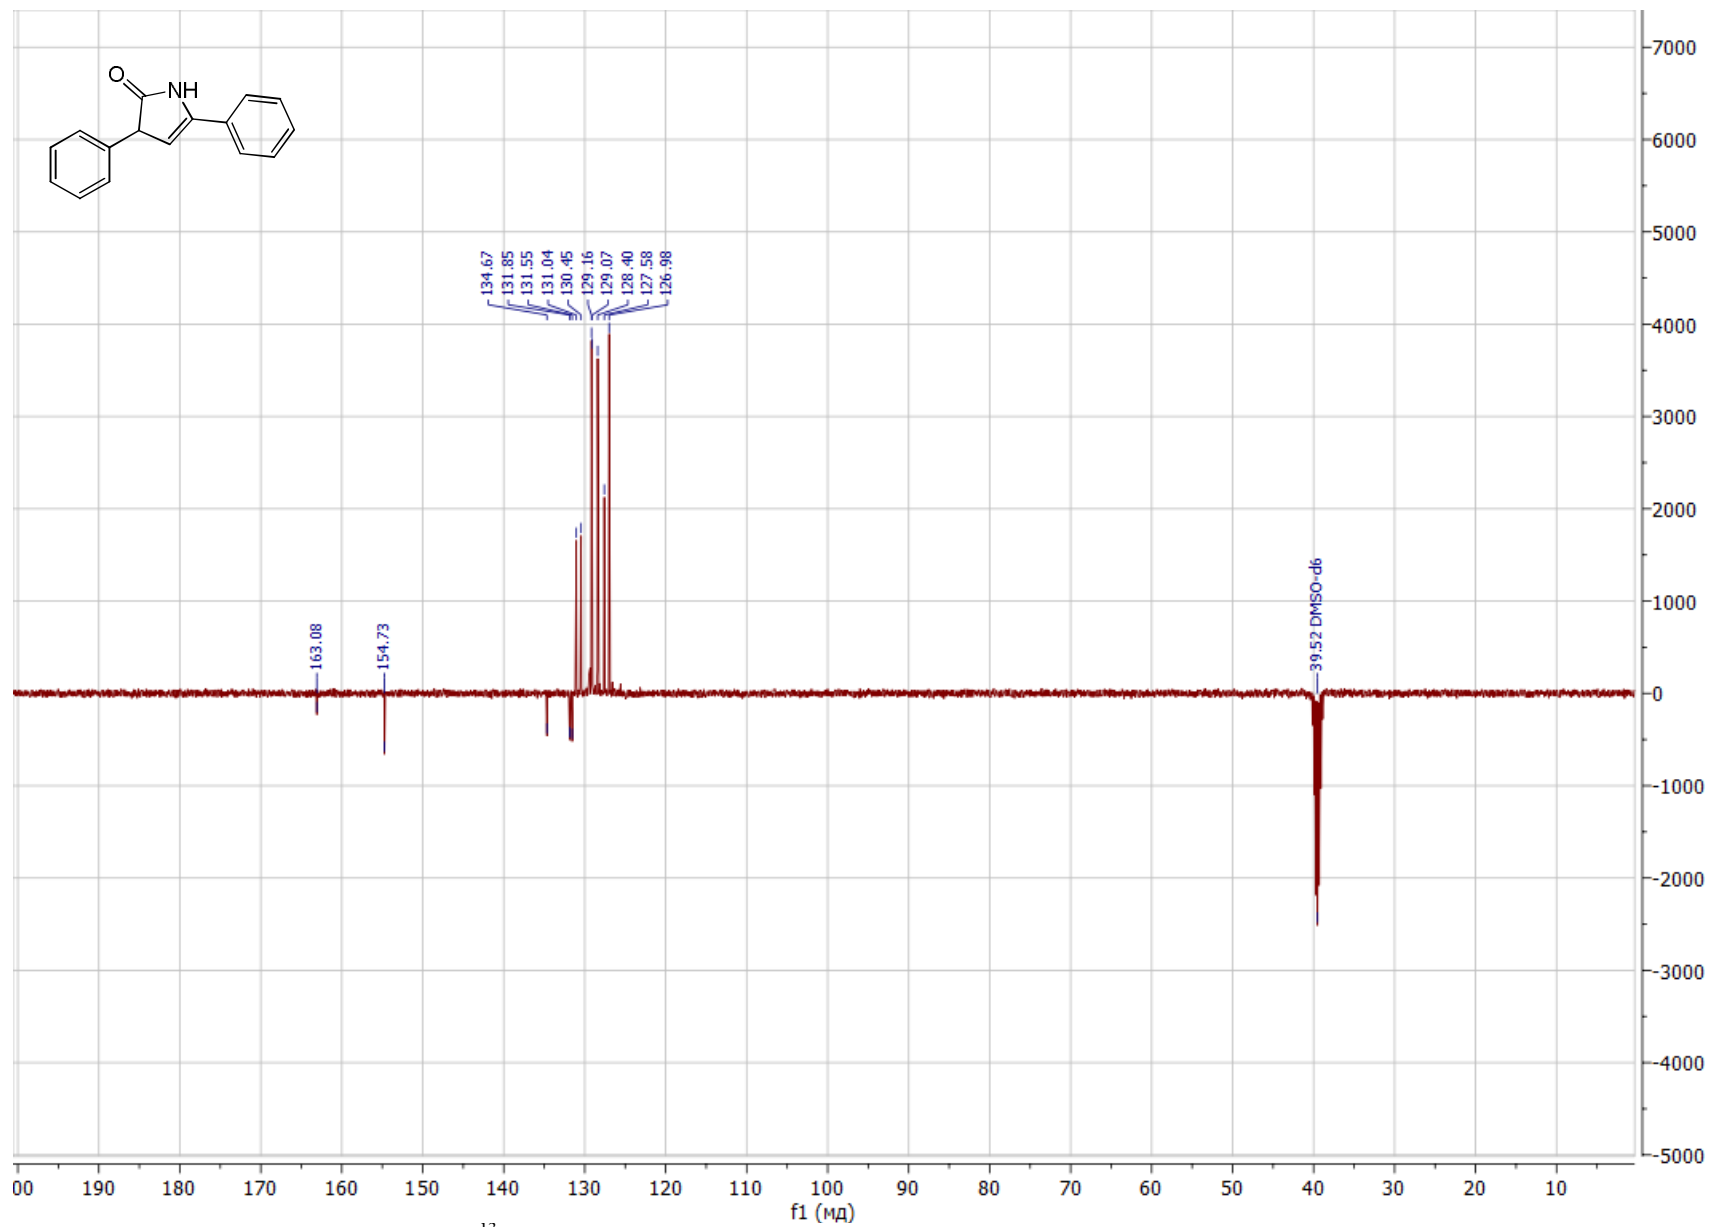

Figure S52.  $^{13}\text{C}$  NMR spectrum 3,5-diphenyl-3H-pyrrol-2-one **15aa** in  $\text{DMSO-}d_6$  (101 MHz)

<sup>1</sup>H and <sup>13</sup>C NMR spectral charts for *N*-(2-aminophenyl)-2-phenylacetamide **16aa**

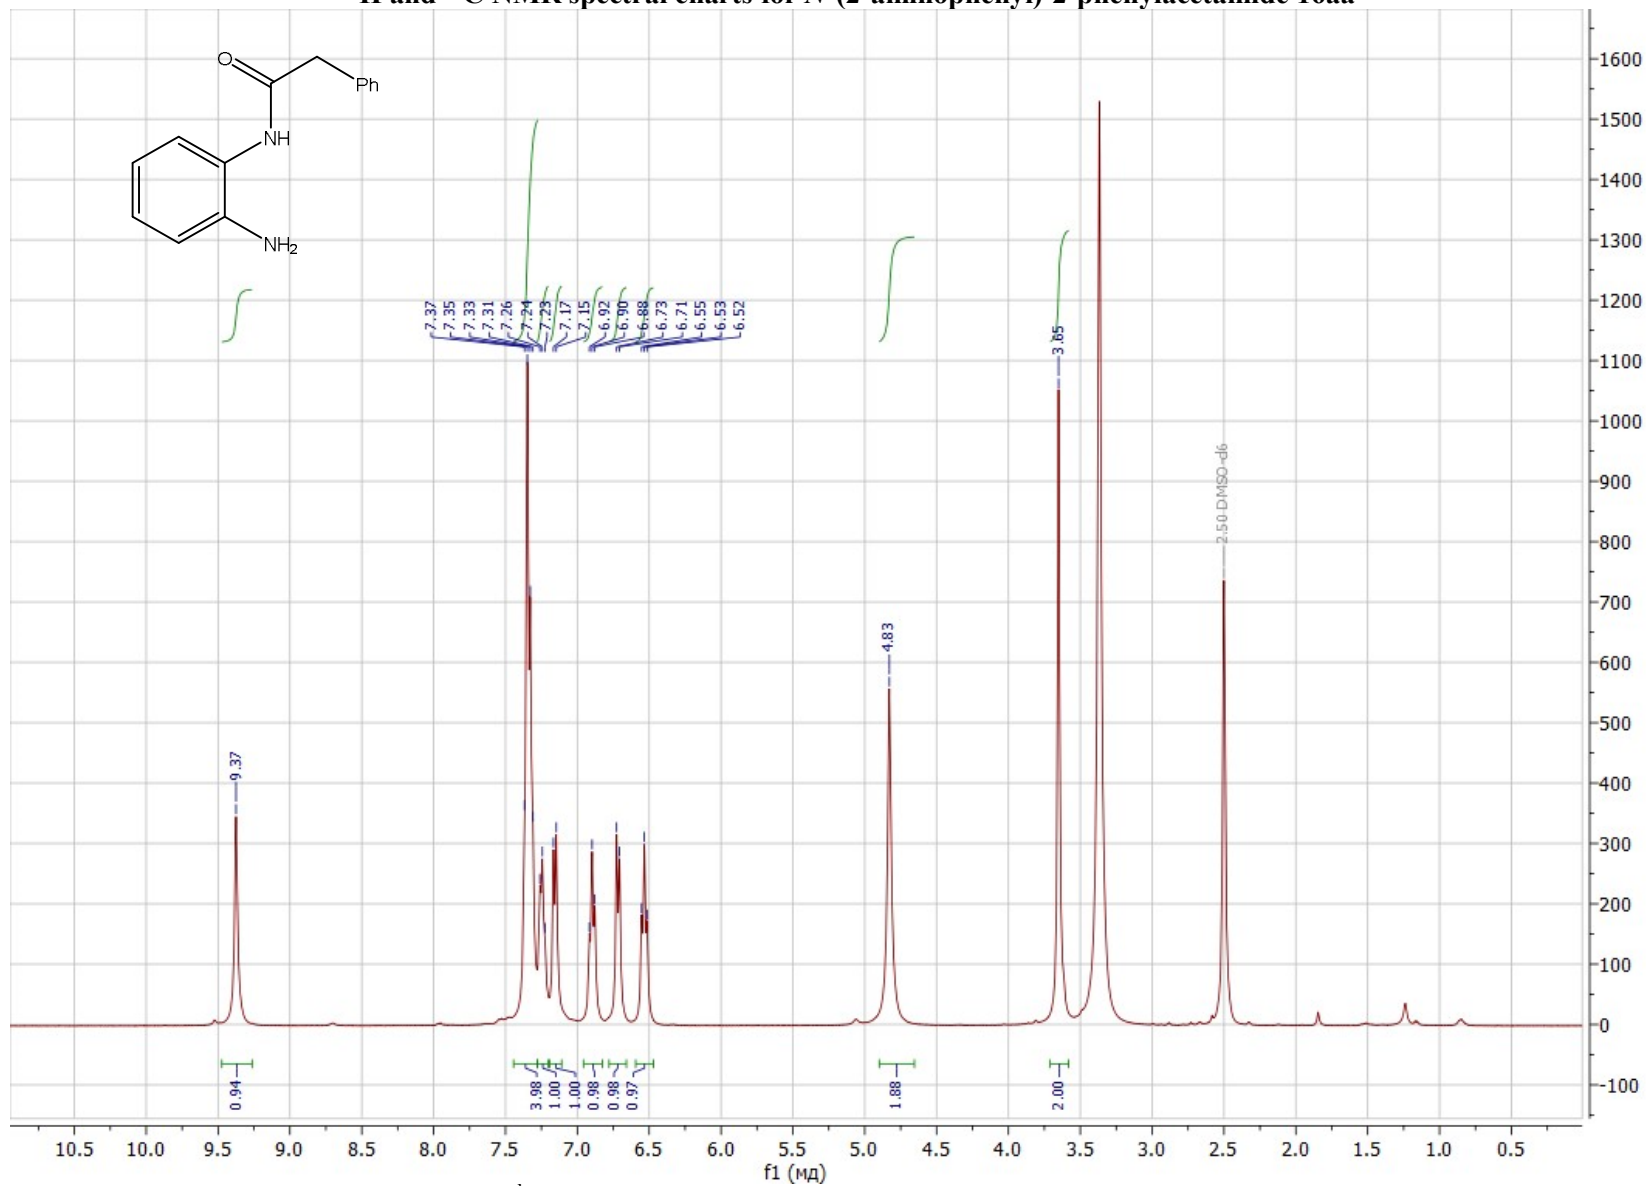

Figure S53. <sup>1</sup>H NMR spectrum of phenylacetamide **16aa** in DMSO-*d*<sub>6</sub> (400 MHz)

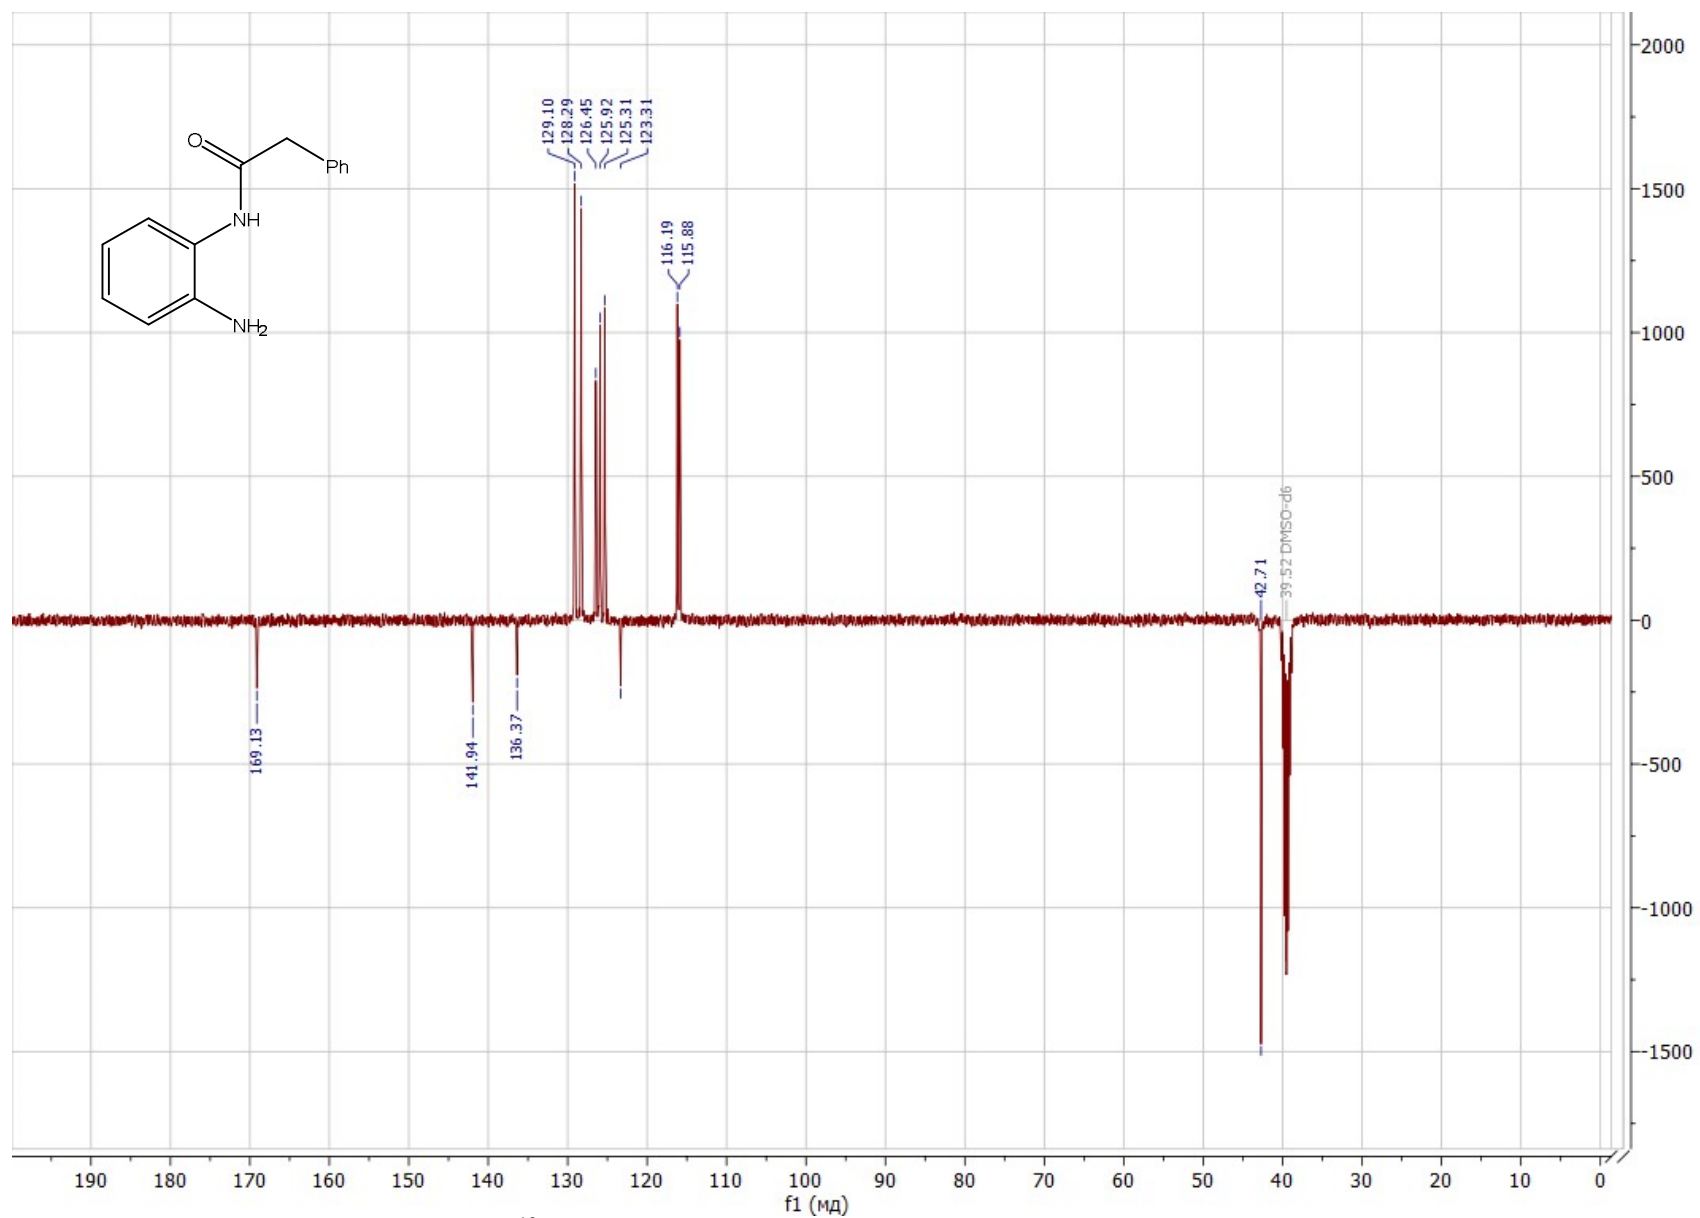

Figure S54.  $^{13}\text{C}$  NMR spectrum of phenylacetamide **16aa** in  $\text{DMSO-}d_6$  (101 MHz)

<sup>1</sup>H and <sup>13</sup>C NMR spectral charts for 2-Benzyl-1H-benzo[d]imidazole 17aa

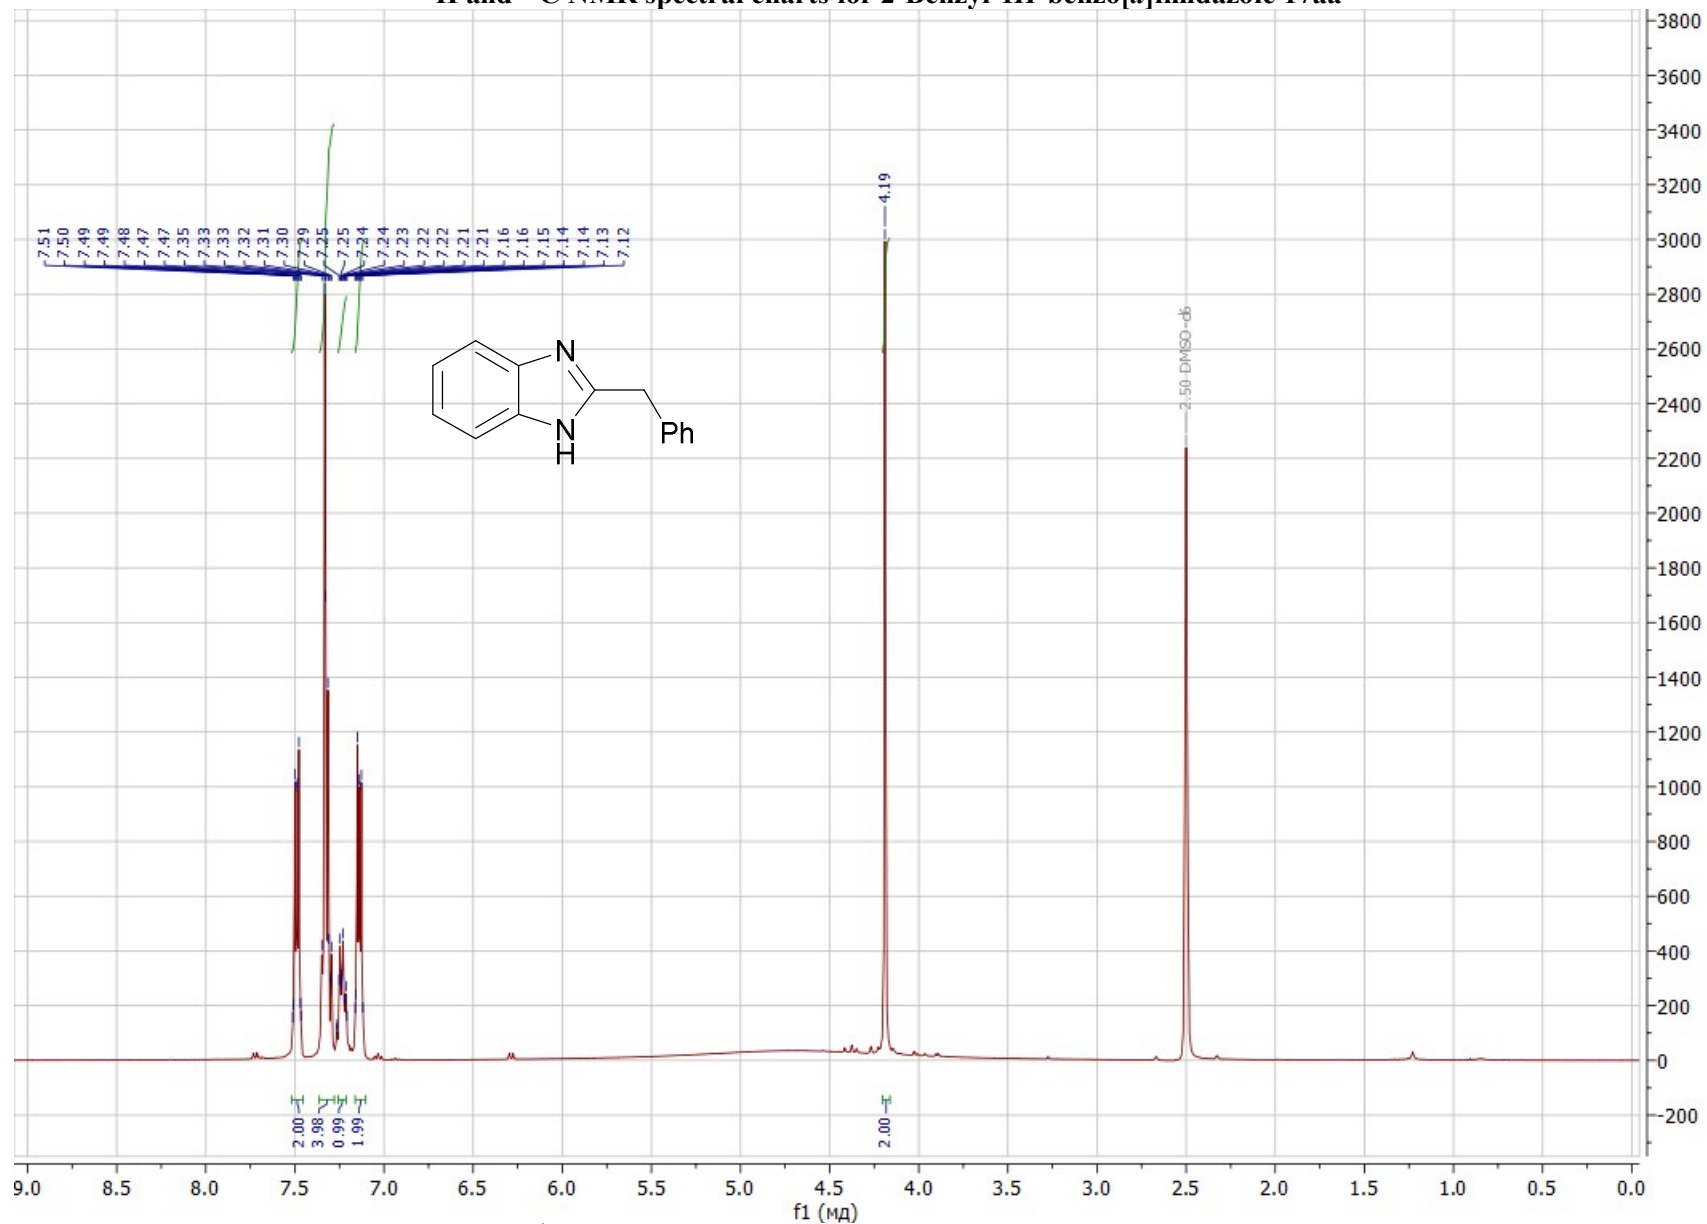

Figure S55. <sup>1</sup>H NMR spectrum of benzoimidazole 17aa in DMSO-*d*<sub>6</sub> (400 MHz)



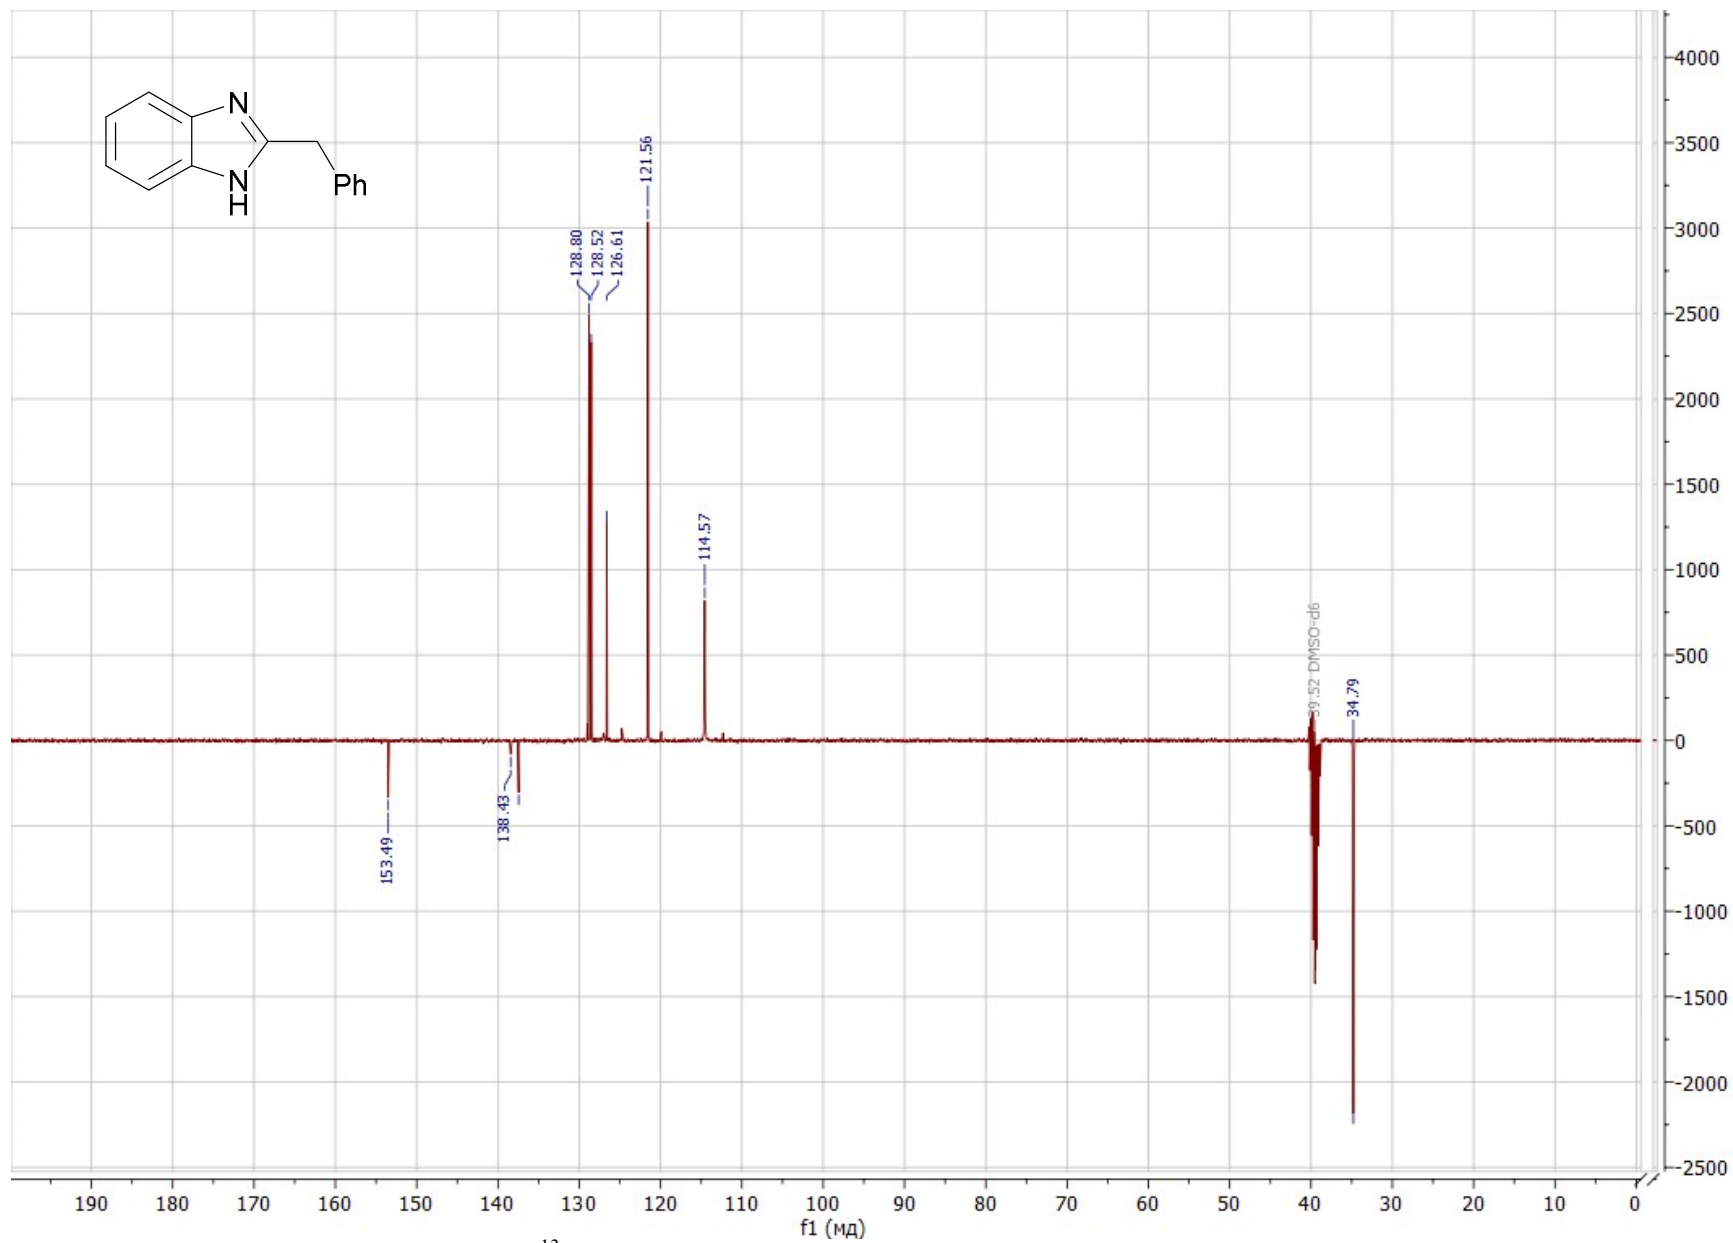

Figure S56.  $^{13}\text{C}$  NMR spectrum of benzoimidazole **17aa** in  $\text{DMSO-}d_6$  (400 MHz)

HRMS spectral chart for 5-hydroxy-5-(3-methoxyphenyl)-3-phenyl-1,5-dihydro-2H-pyrrol-2-one **1ca**

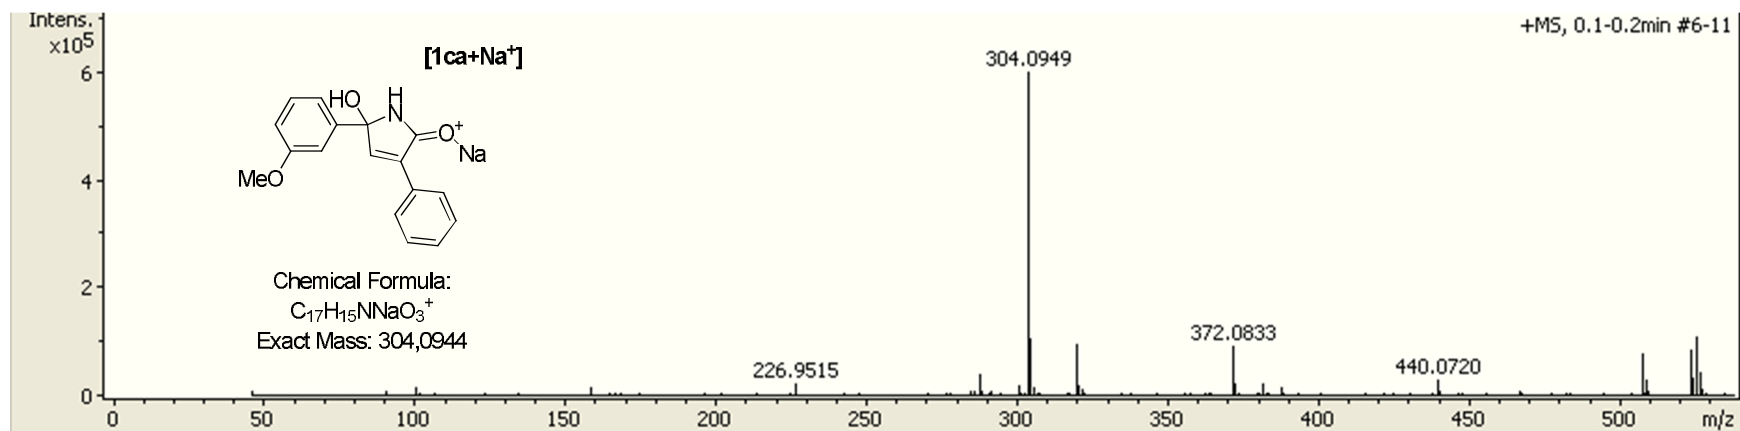

Figure S57. HRMS Chart for 5-hydroxy-5-(3-methoxyphenyl)-3-phenyl-1,5-dihydro-2H-pyrrol-2-one (**1ca**)

### HRMS spectral charts for quinoxalines 8

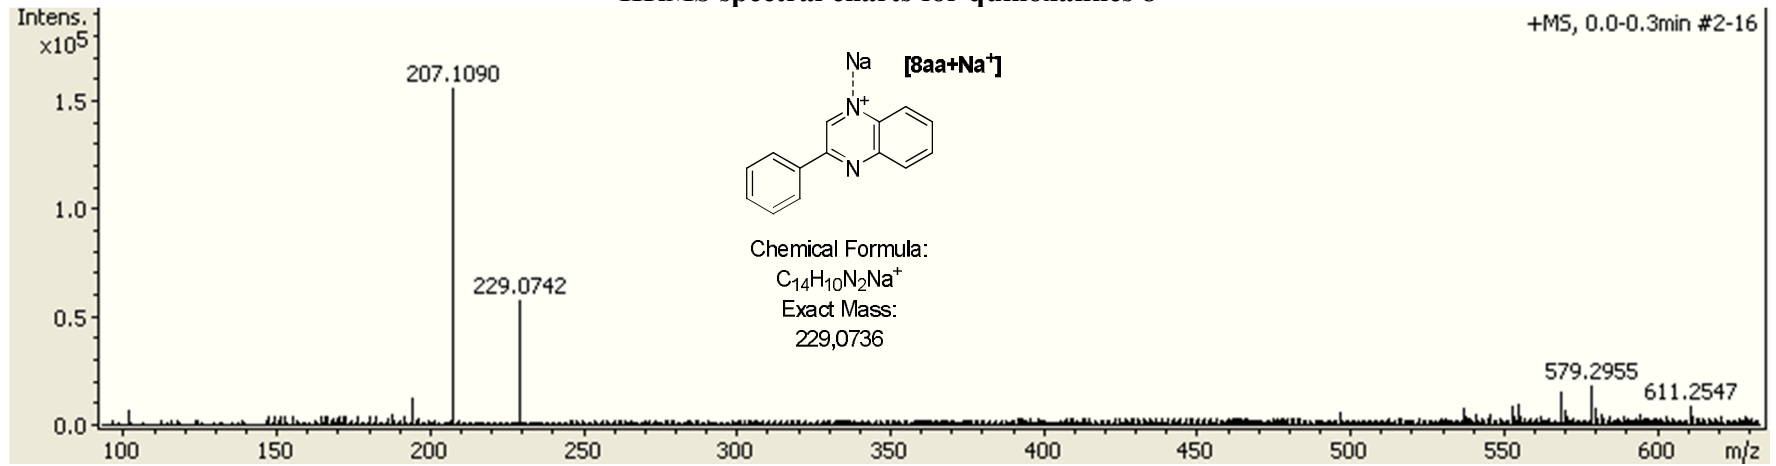

Figure S58. HRMS Chart for 2-Phenylquinoxaline (**8aa**)

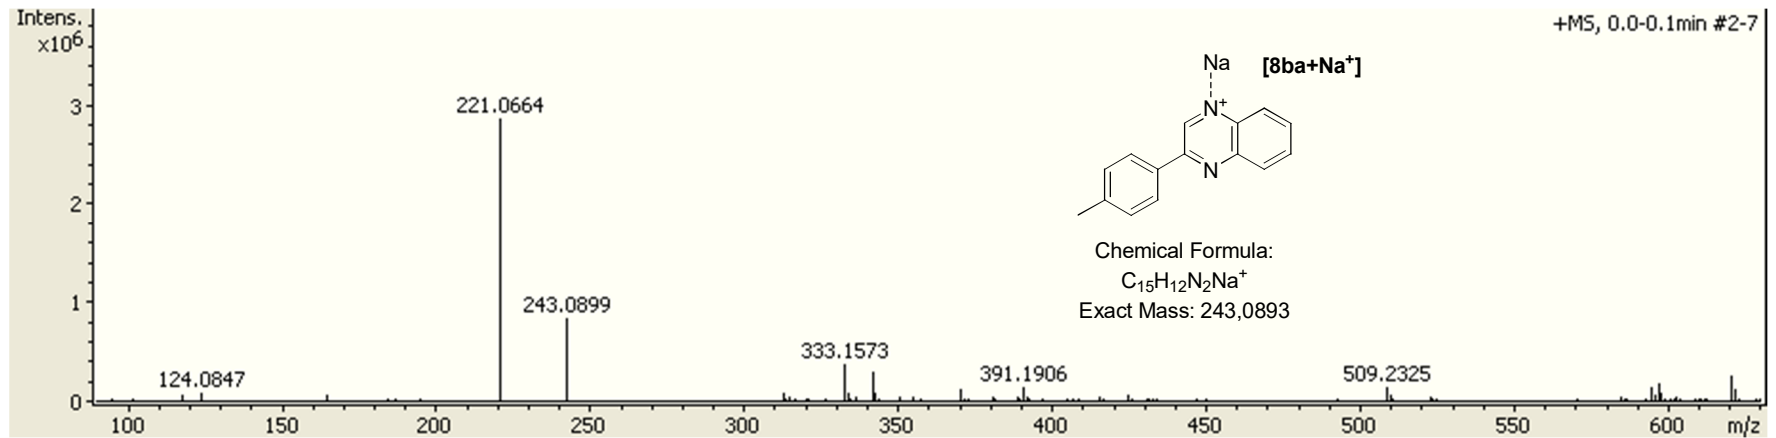

Figure S59. HRMS Chart for 2-(*p*-Tolyl)quinoxaline (**8ba**)

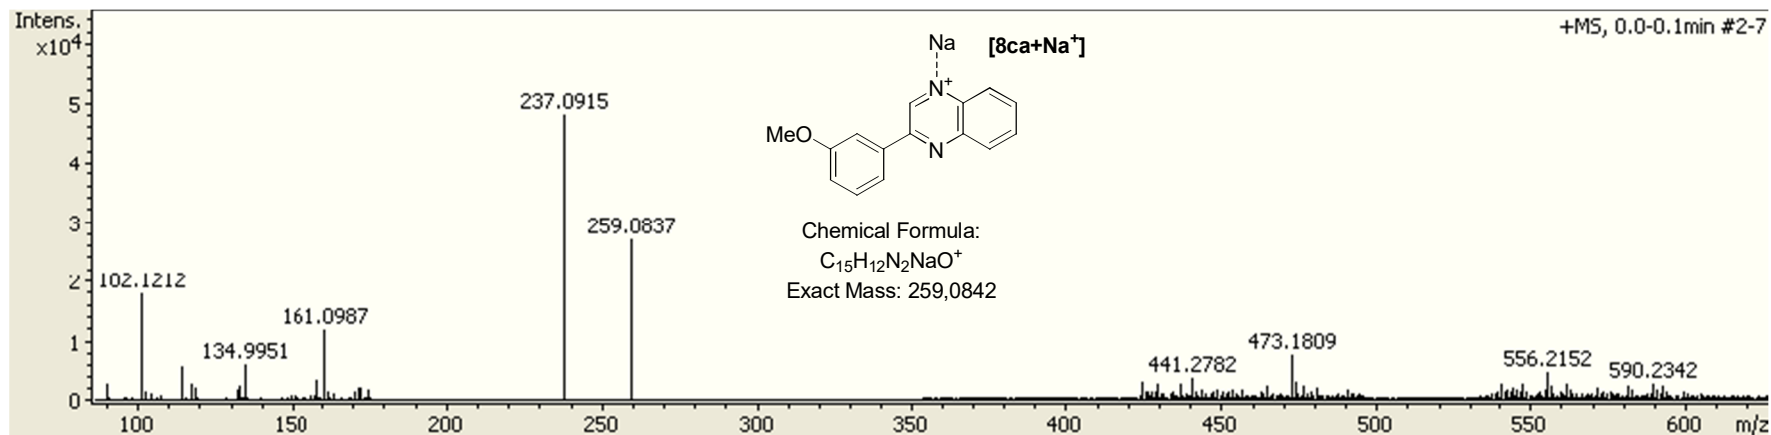

Figure S60. HRMS Chart for 2-(3-Methoxyphenyl)quinoxaline (**8ca**):

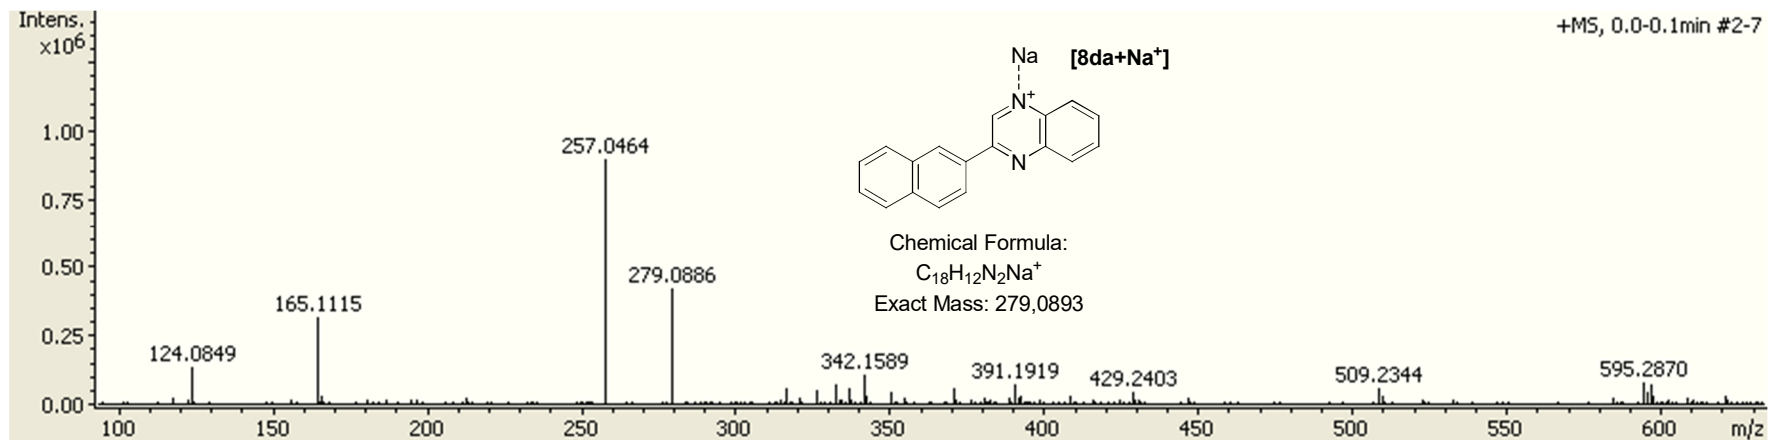

Figure S61. HRMS Chart for 2-(Naphthalen-2-yl)quinoxaline (**8da**):

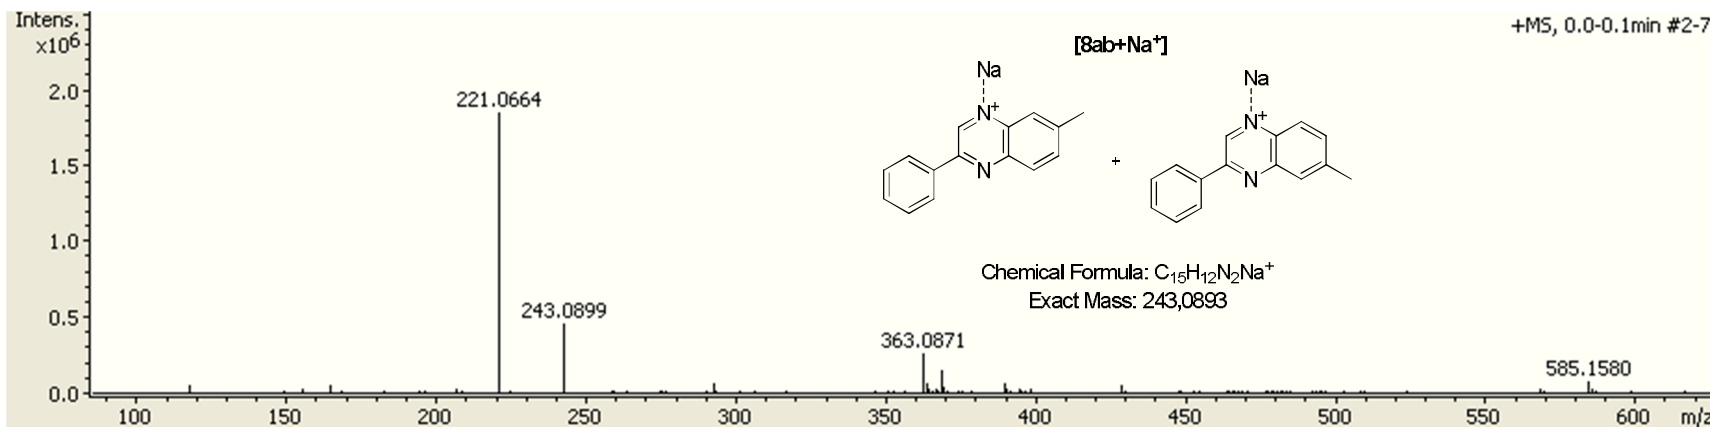

Figure S62. HRMS Chart for 7-Methyl-2-phenylquinoxaline (**8ab**) and 6-Methyl-2-phenylquinoxaline (**8ab'**)

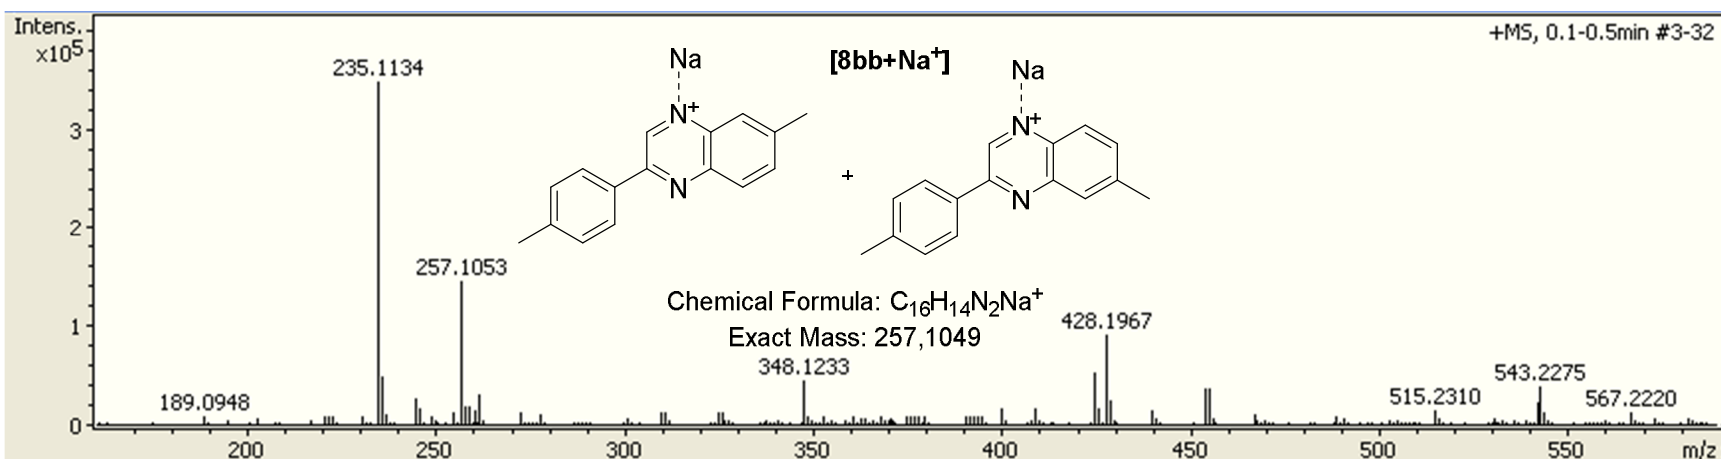

Figure S63. HRMS Chart for 7-Methyl-2-(*p*-tolyl)quinoxaline (**8bb**) and 6-Methyl-2-(*p*-tolyl)quinoxaline (**8bb'**)

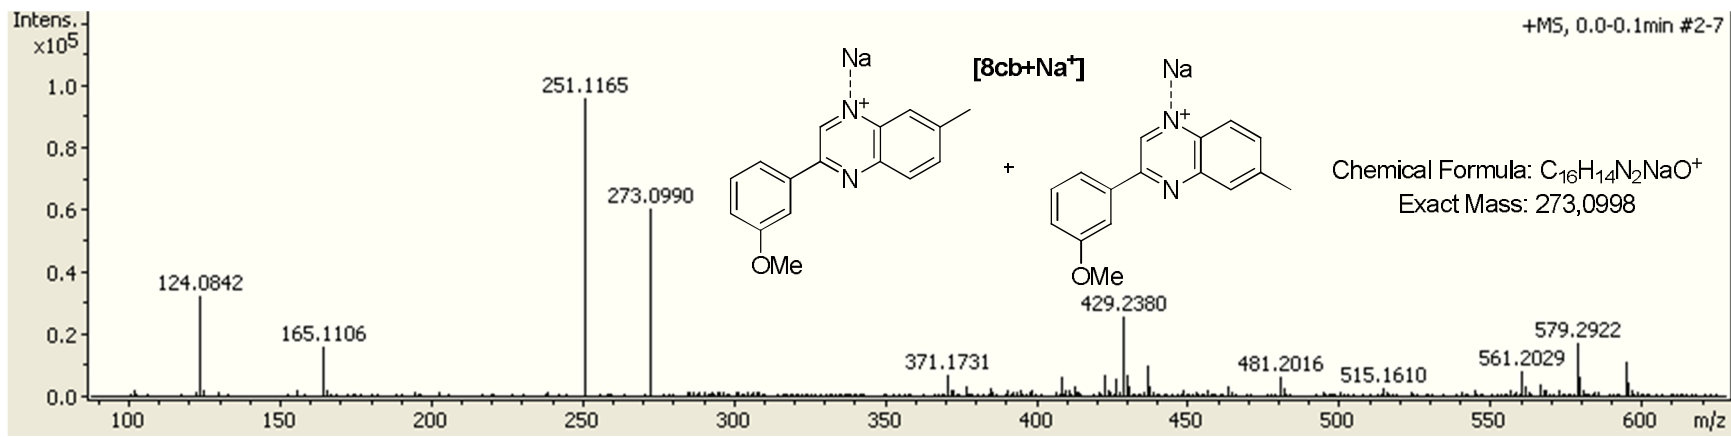

Figure S64. HRMS Chart for 2-(3-Methoxyphenyl)-7-methylquinoxaline (8cb) and 2-(3-Methoxyphenyl)-6-methylquinoxaline (8cb')

### HRMS spectral charts for 2-aryl-3-benzylimidazo[1,2-*a*]pyridines 10

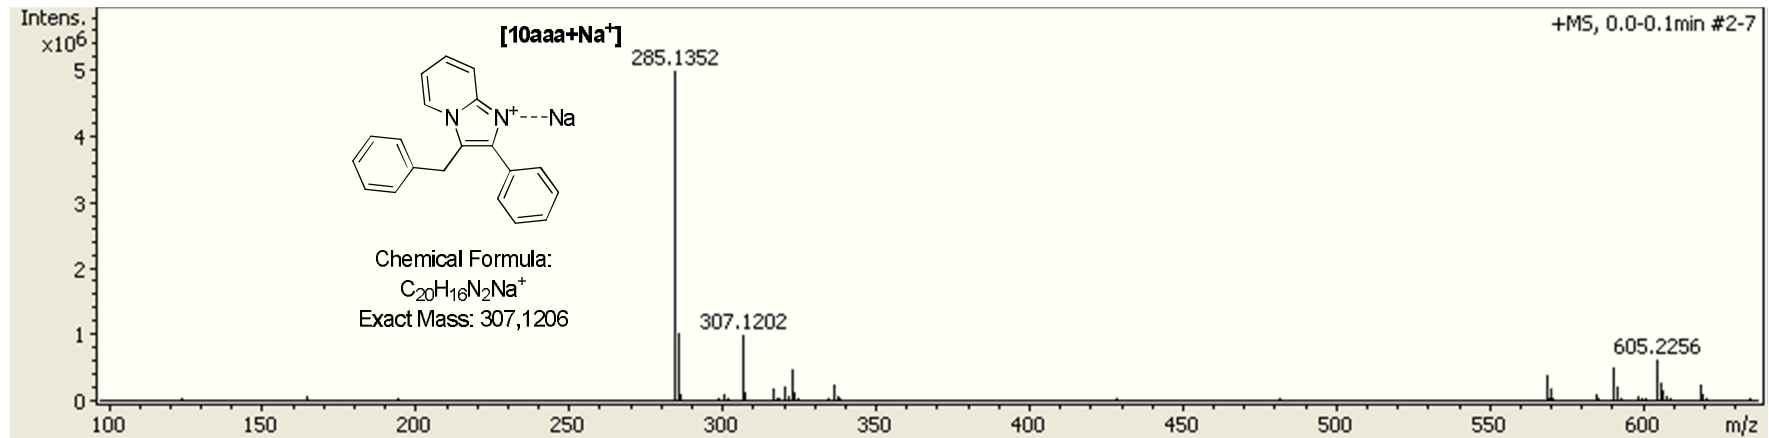

Figure S65. HRMS Chart for 3-Benzyl-2-phenylimidazo[1,2-*a*]pyridine (**10aaa**)

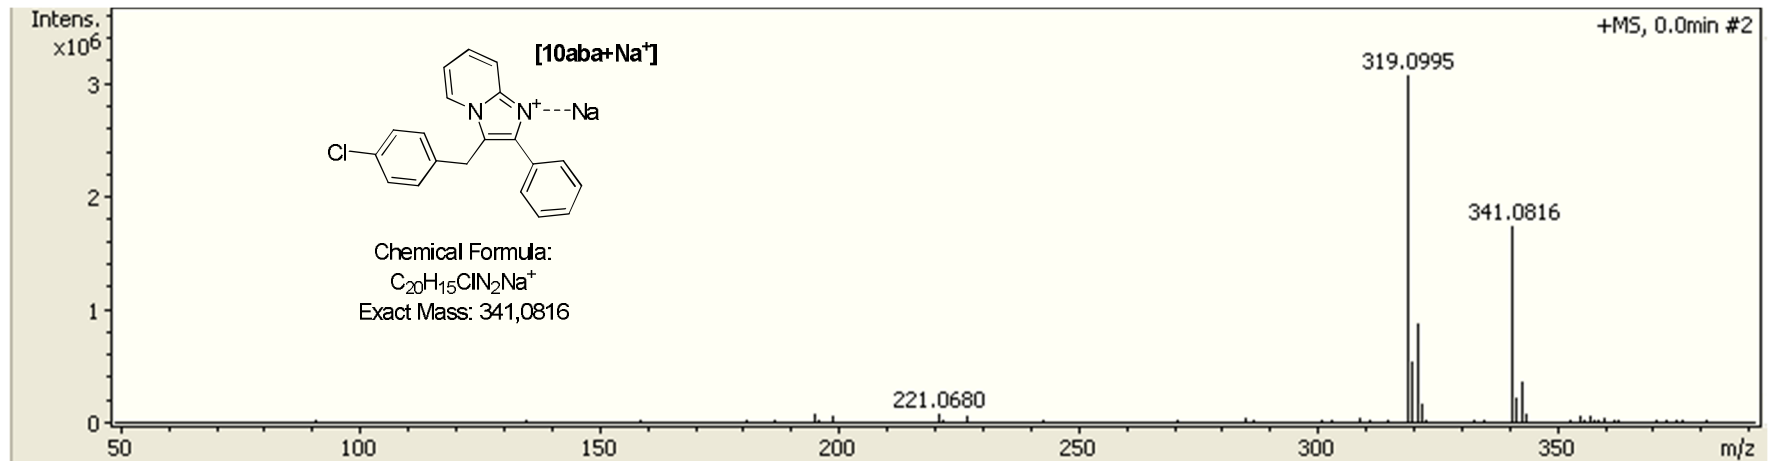

Figure S66. HRMS Chart for 3-(4-Chlorobenzyl)-2-phenylimidazo[1,2-*a*]pyridine (**10aba**)

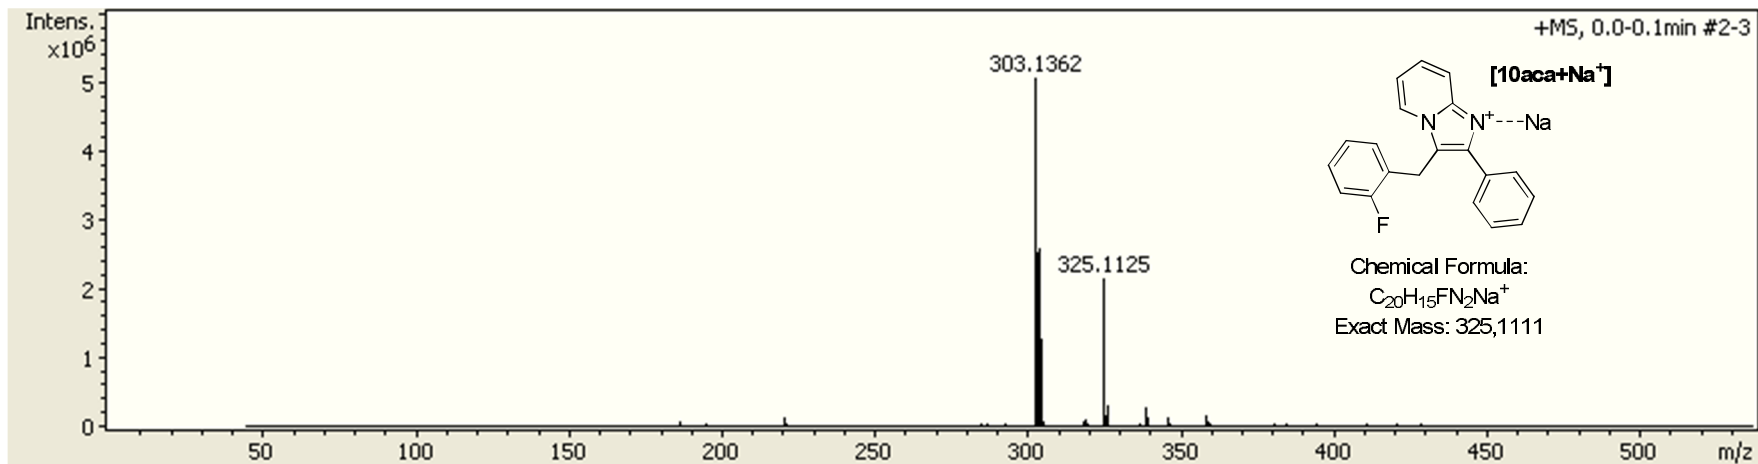

Figure S67. HRMS Chart for 3-(2-Fluorobenzyl)-2-phenylimidazo[1,2-*a*]pyridine (**10aca**)

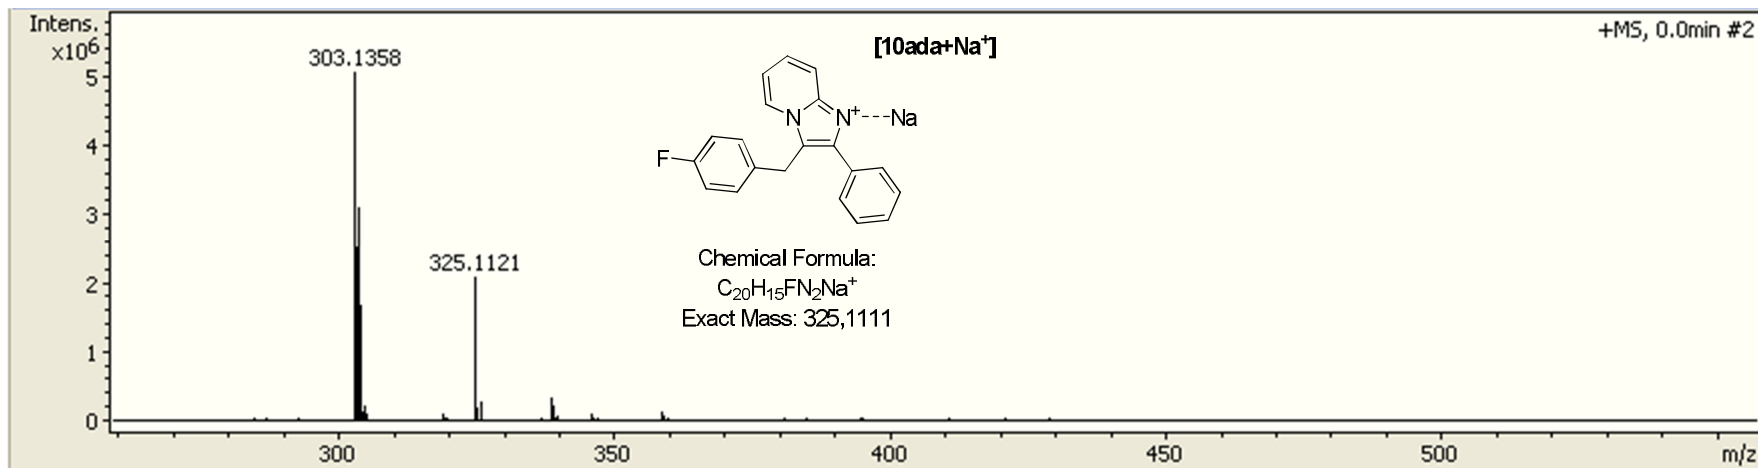

Figure S68. HRMS Chart for 3-(4-Fluorobenzyl)-2-phenylimidazo[1,2-*a*]pyridine (**10ada**)



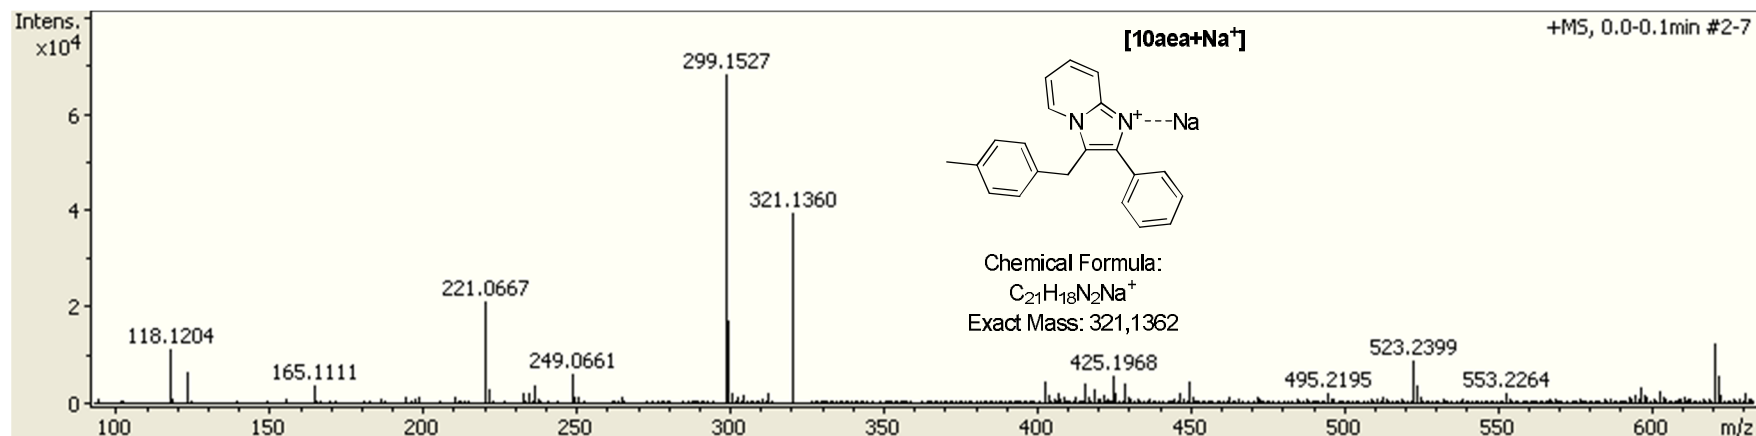

Figure S69. HRMS Chart for 3-(4-Methylbenzyl)-2-phenylimidazo[1,2-*a*]pyridine (**10aea**)

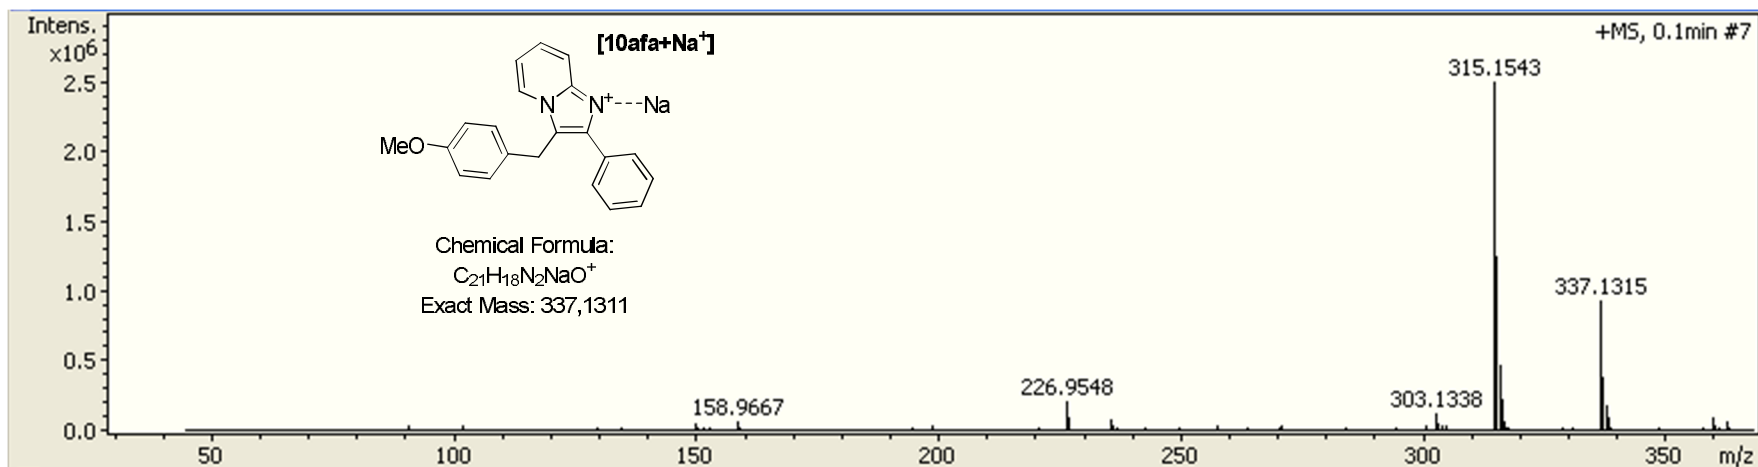

Figure S70. HRMS Chart 3-(4-Methoxybenzyl)-2-phenylimidazo[1,2-*a*]pyridine (**10afa**)

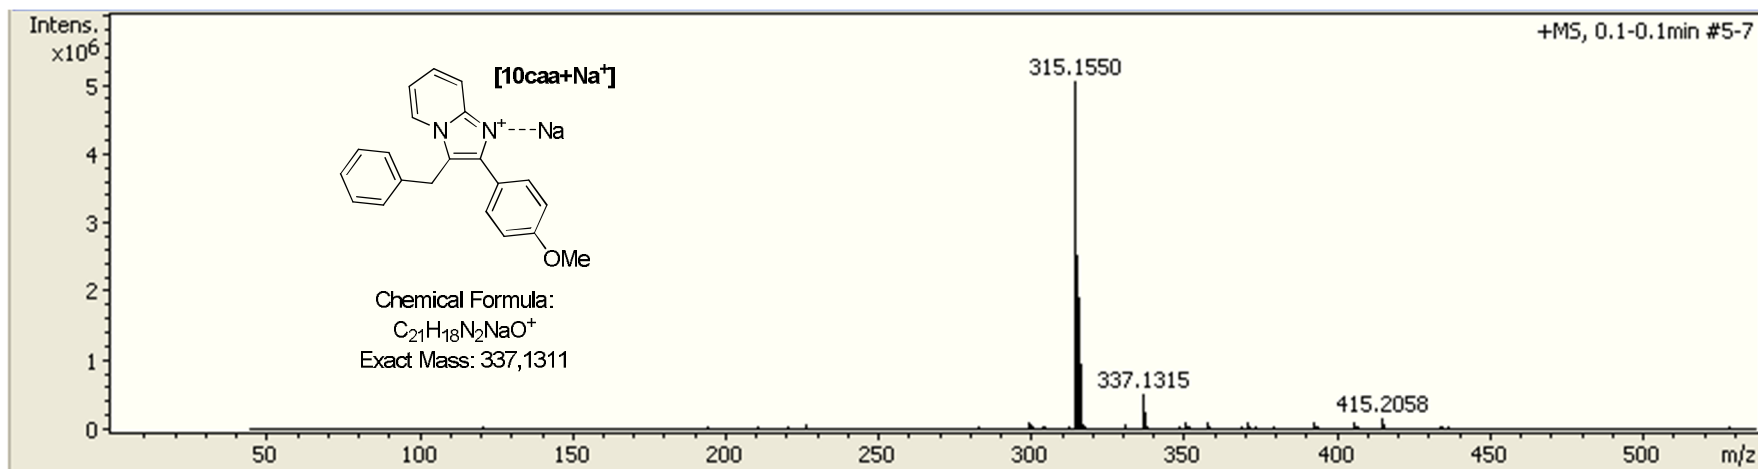

Figure S71. HRMS Chart for 3-Benzyl-2-(4-methoxyphenyl)imidazo[1,2-*a*]pyridine (**10caa**)

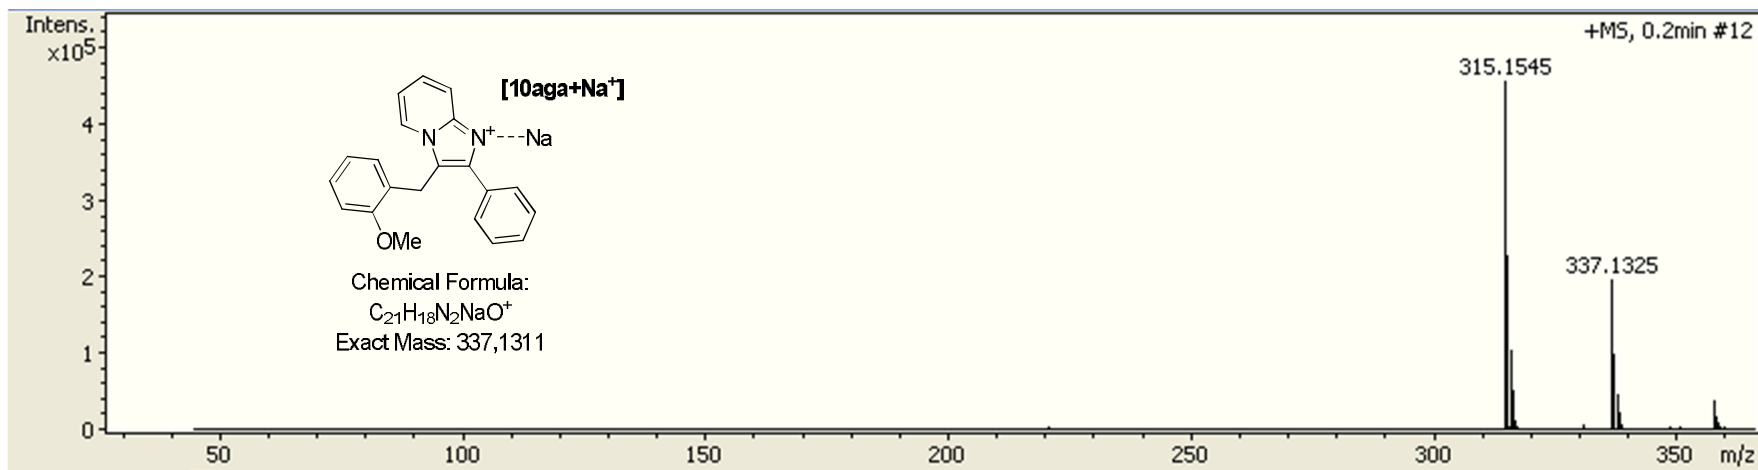

Figure S72. HRMS Chart for 3-(2-Methoxybenzyl)-2-phenylimidazo[1,2-*a*]pyridine (**10aga**)

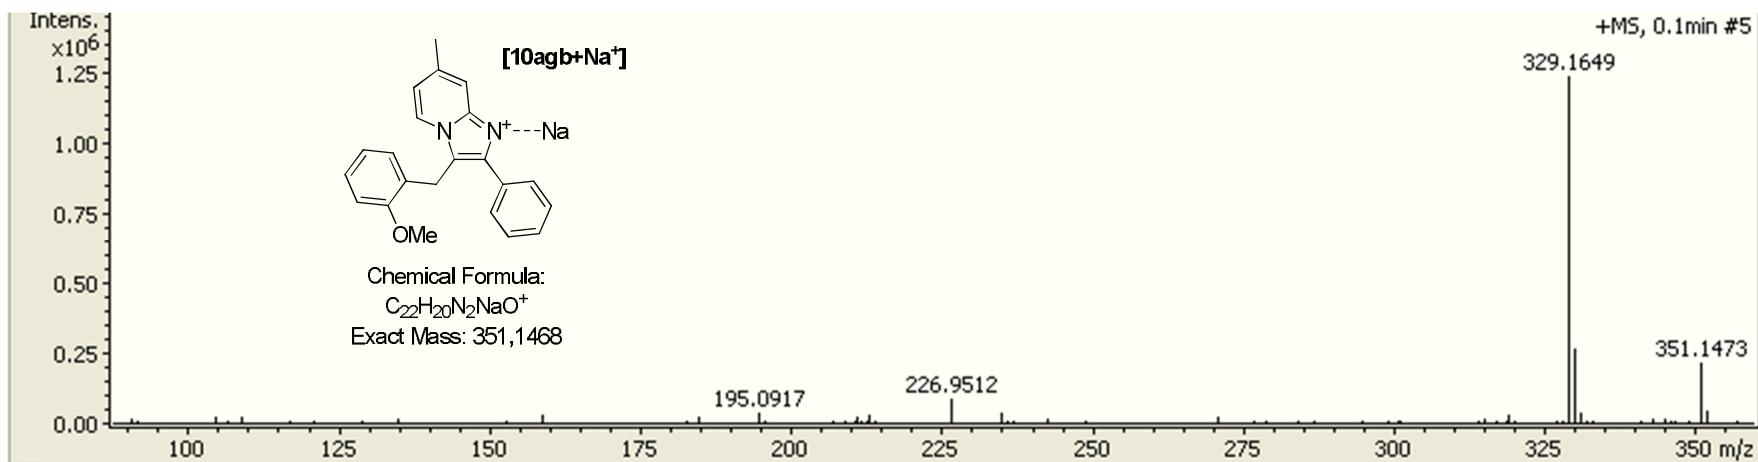

Figure S73. HRMS Chart for 3-(2-Methoxybenzyl)-7-methyl-2-phenylimidazo[1,2-a]pyridine (**10agb**)

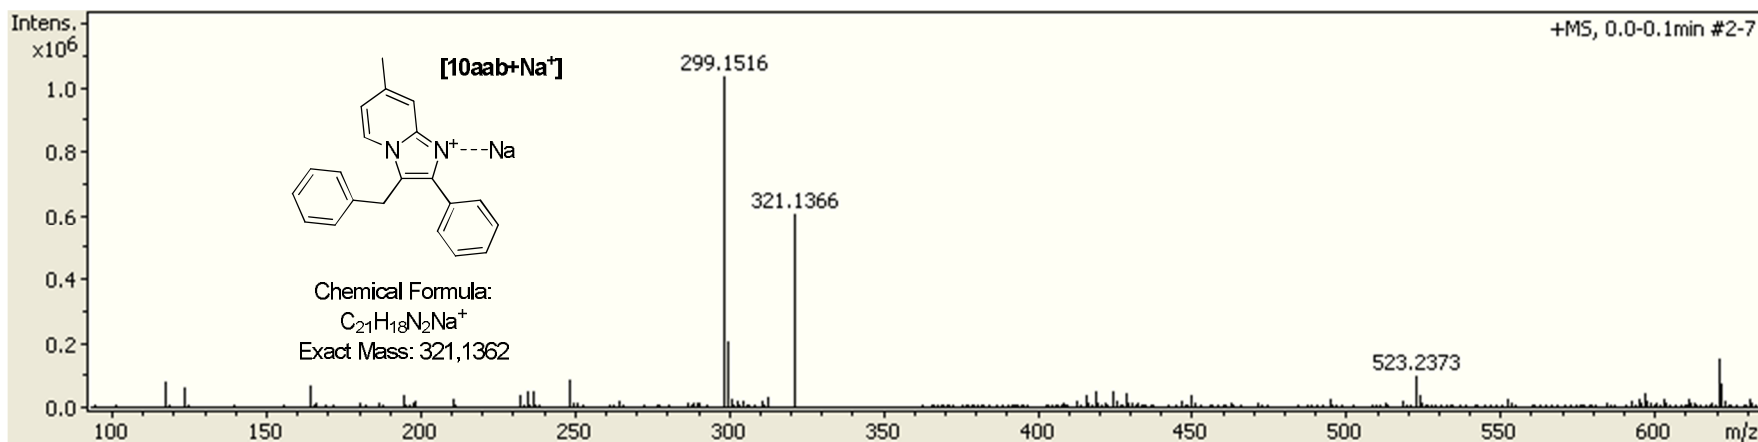

Figure S74. HRMS Chart for 3-Benzyl-7-methyl-2-phenylimidazo[1,2-a]pyridine (**10aab**)

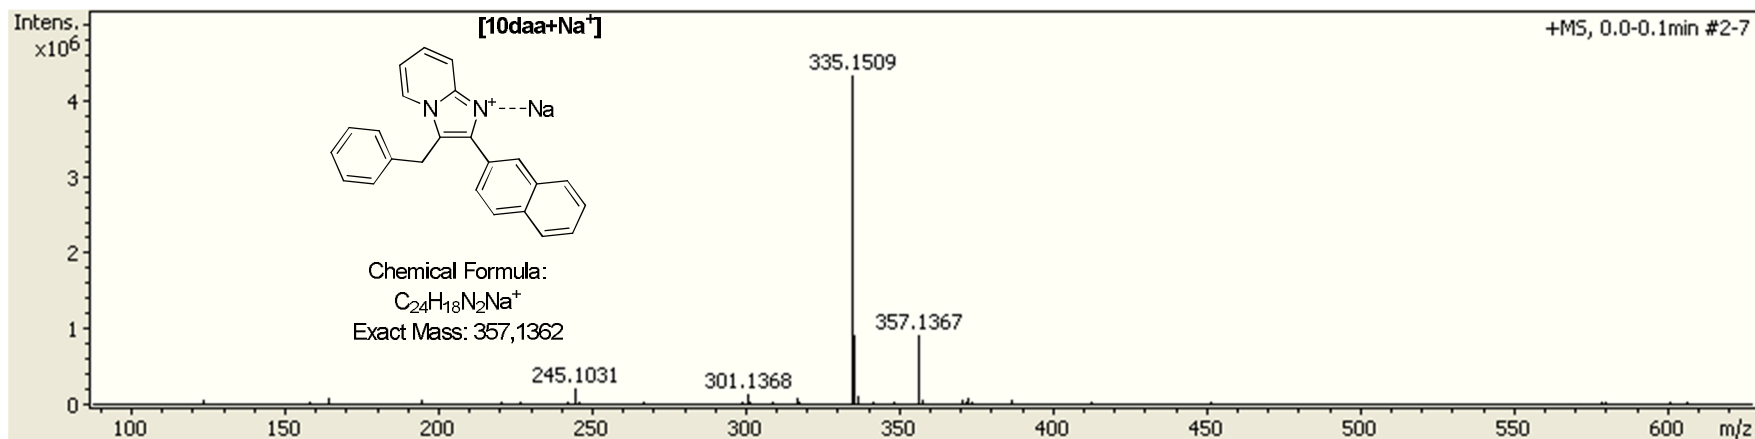

Figure S75. HRMS Chart for 3-Benzyl-2-(naphthalen-2-yl)imidazo[1,2-*a*]pyridine (**10daa**)

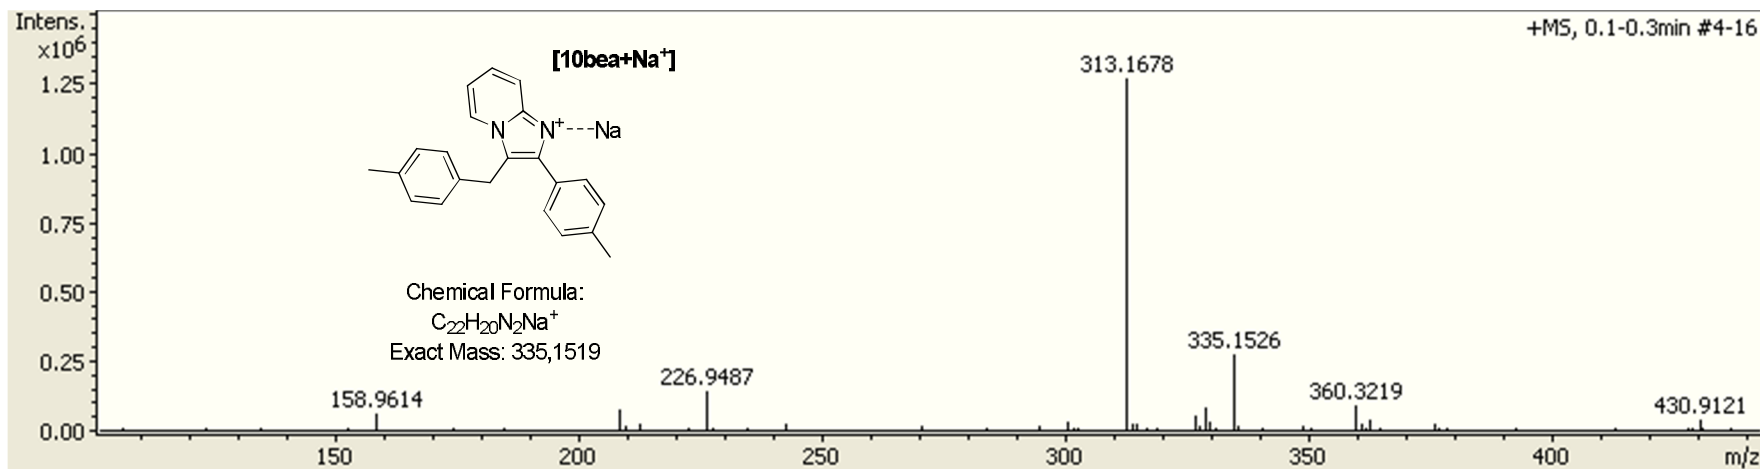

Figure S76. HRMS Chart for 3-(4-Methylbenzyl)-2-(*p*-tolyl)imidazo[1,2-*a*]pyridine (**10bea**)

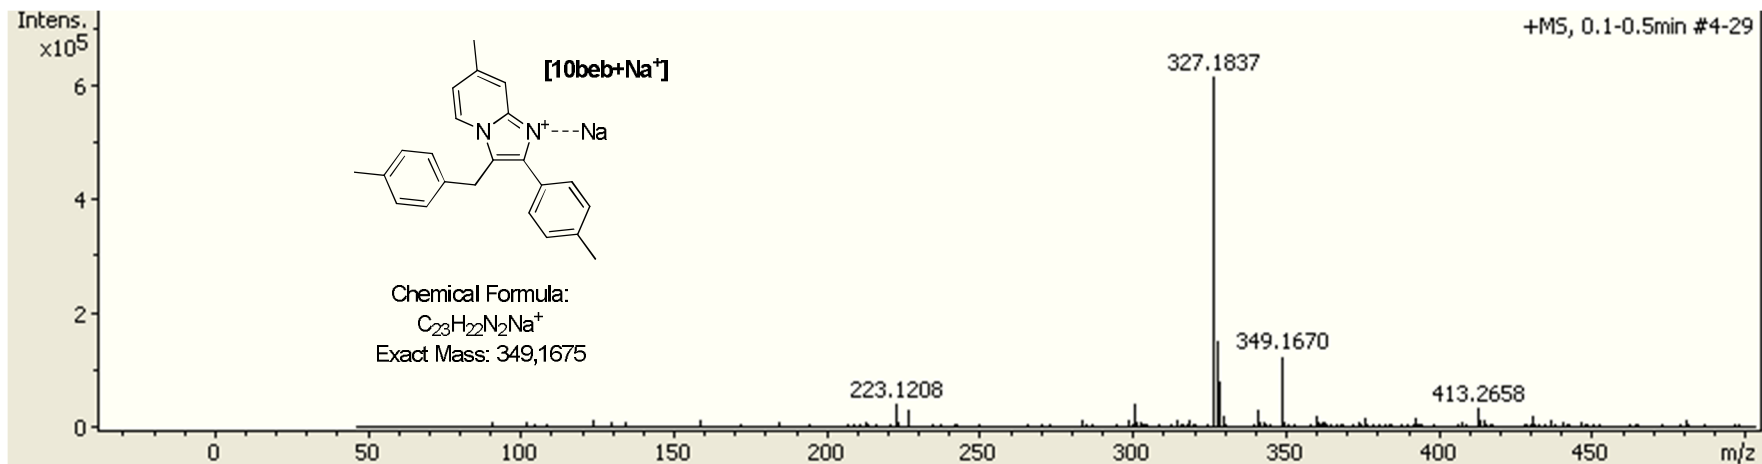

Figure S77. HRMS Chart for 7-Methyl-3-(4-methylbenzyl)-2-(*p*-tolyl)imidazo[1,2-*a*]pyridine (**10beb**)

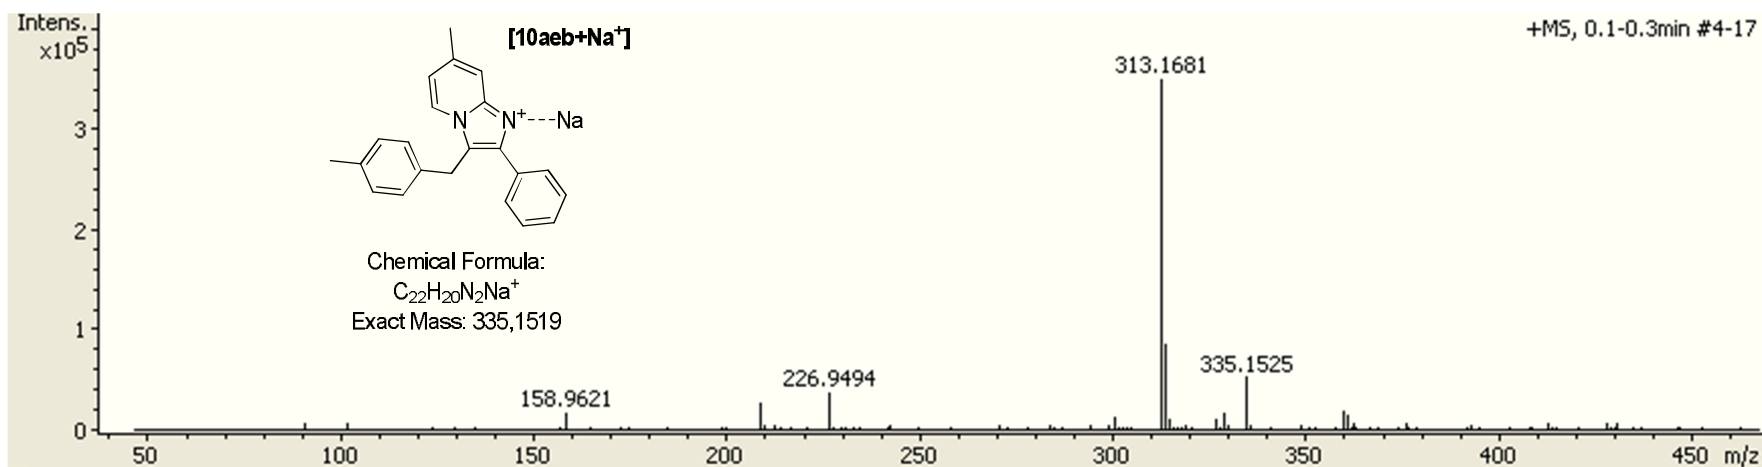

Figure S78. HRMS Chart for 7-Methyl-3-(4-methylbenzyl)-2-phenylimidazo[1,2-*a*]pyridine (**10aeb**)

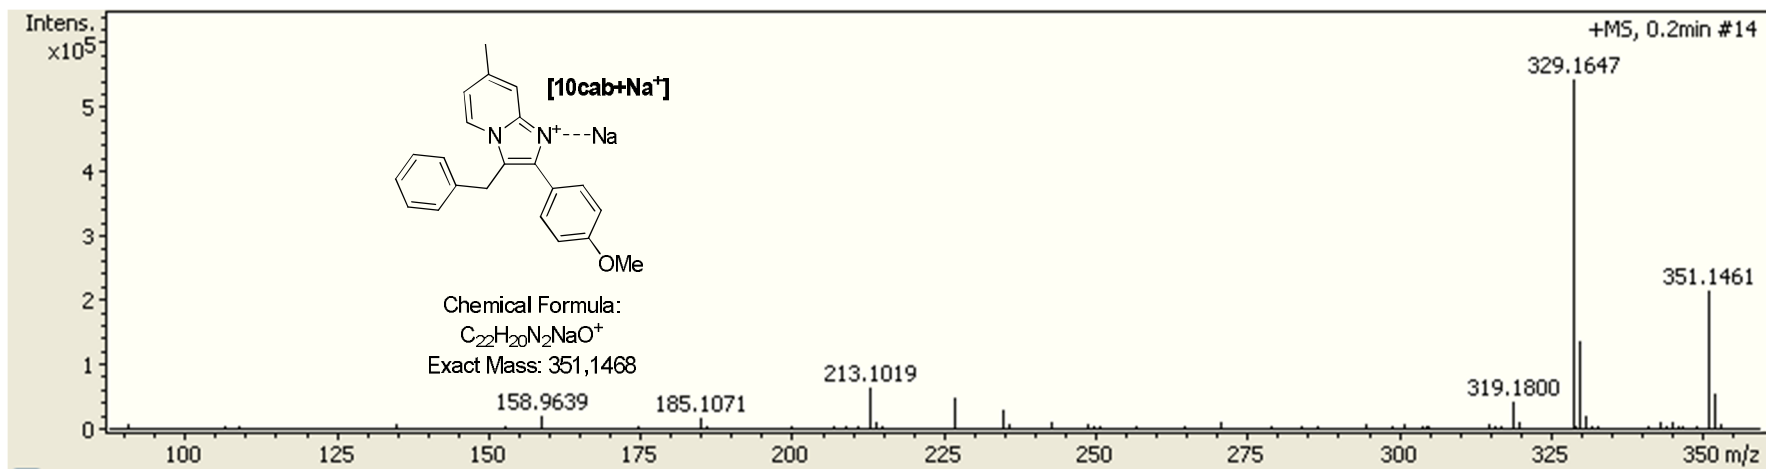

Figure S79. HRMS Chart for 3-Benzyl-2-(4-methoxyphenyl)-7-methylimidazo[1,2-*a*]pyridine (**10cab**)

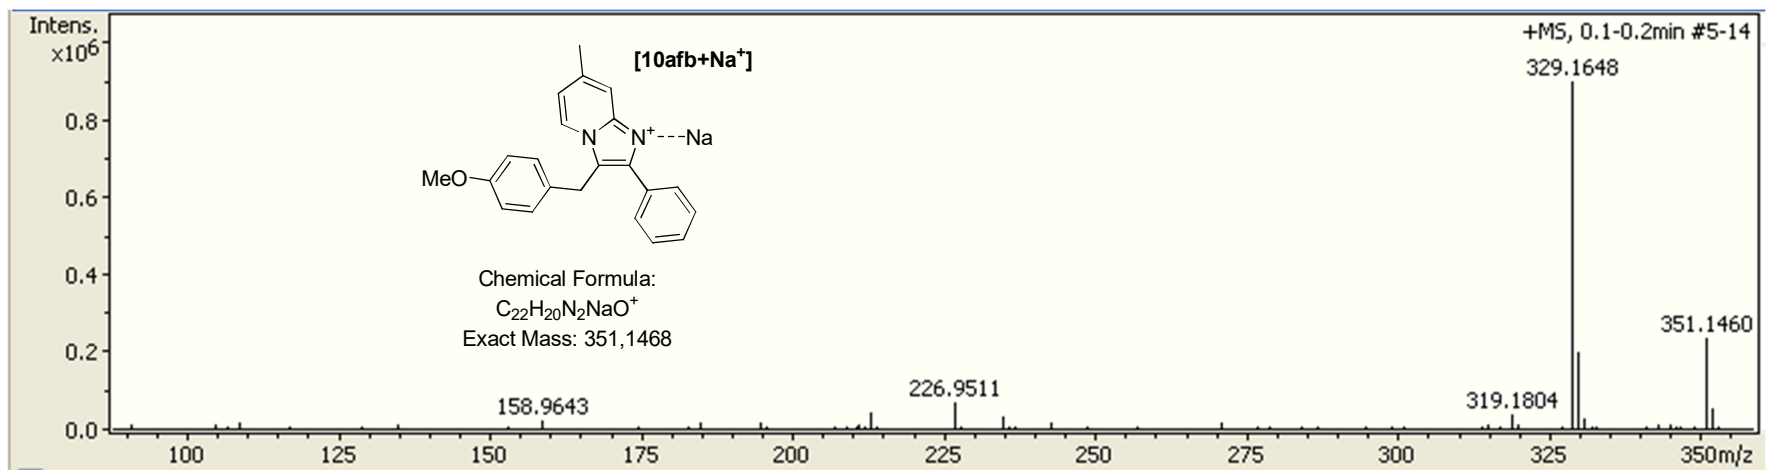

Figure S80. HRMS Chart for 3-(4-Methoxybenzyl)-7-methyl-2-phenylimidazo[1,2-*a*]pyridine (**10afb**)

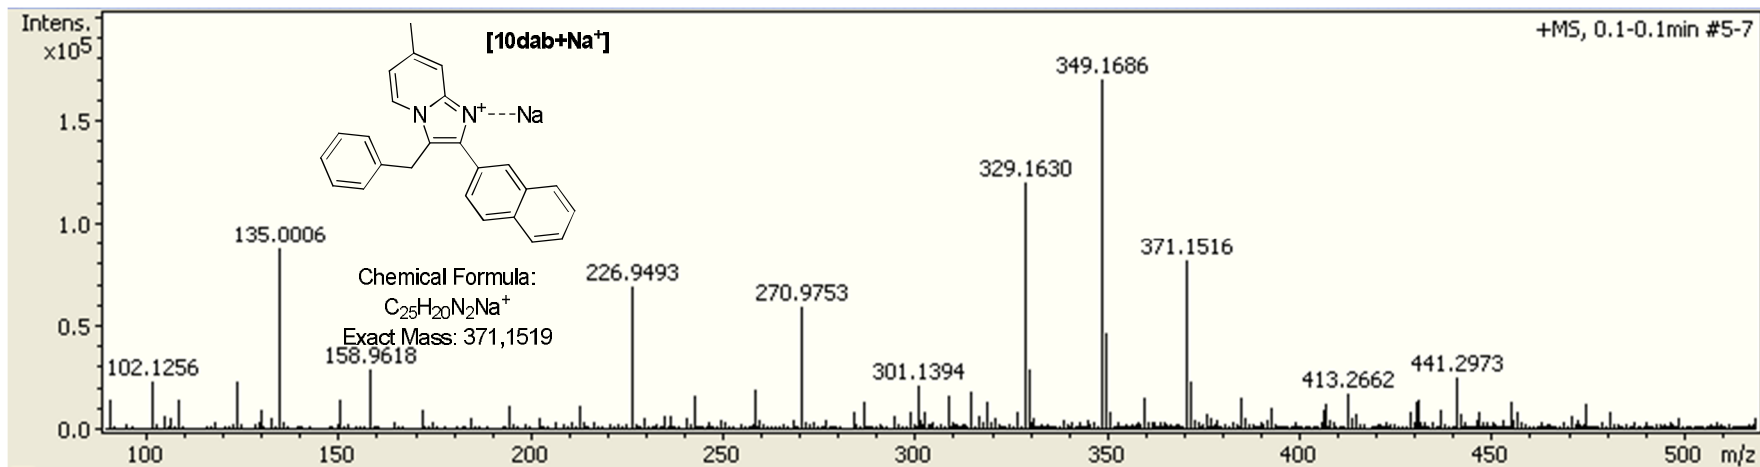

Figure S81. HRMS Chart for 3-Benzyl-2-(4-methoxyphenyl)-7-methylimidazo[1,2-*a*]pyridine (**10dab**)

### HRMS spectral chart for 3,5-diphenyl-3H-pyrrol-2-one 15aa

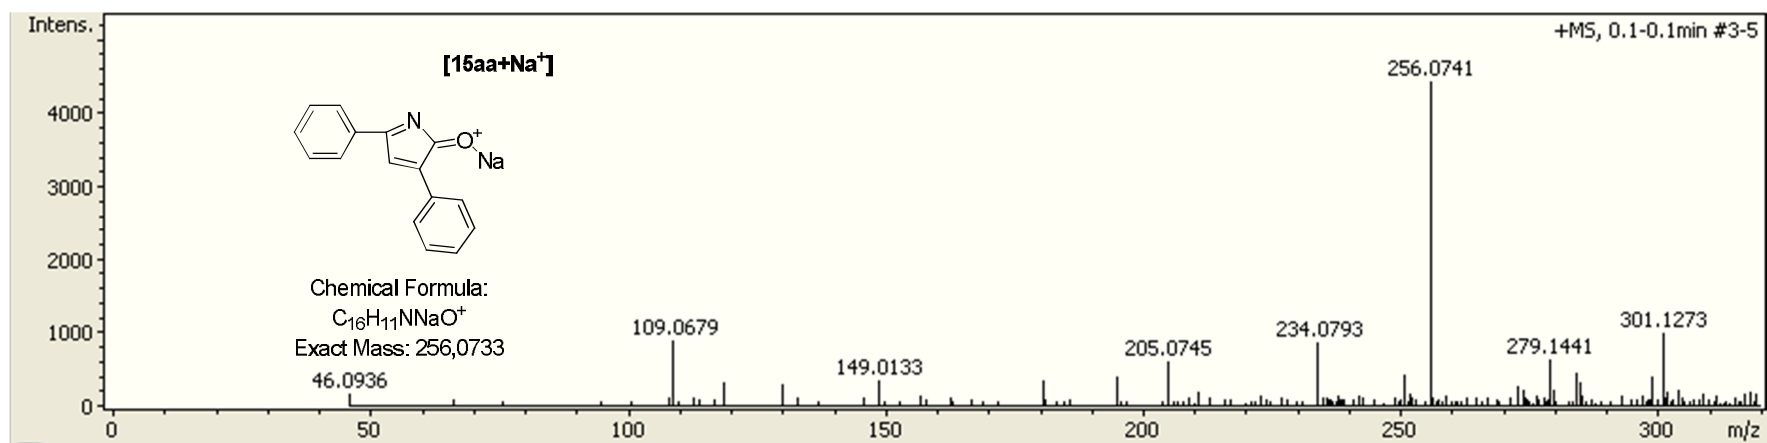

Figure S82. HRMS Chart for 3,5-diphenyl-3H-pyrrol-2-one (15aa)



HRMS spectral chart for *N*-(2-aminophenyl)-2-phenylacetamide **16aa**

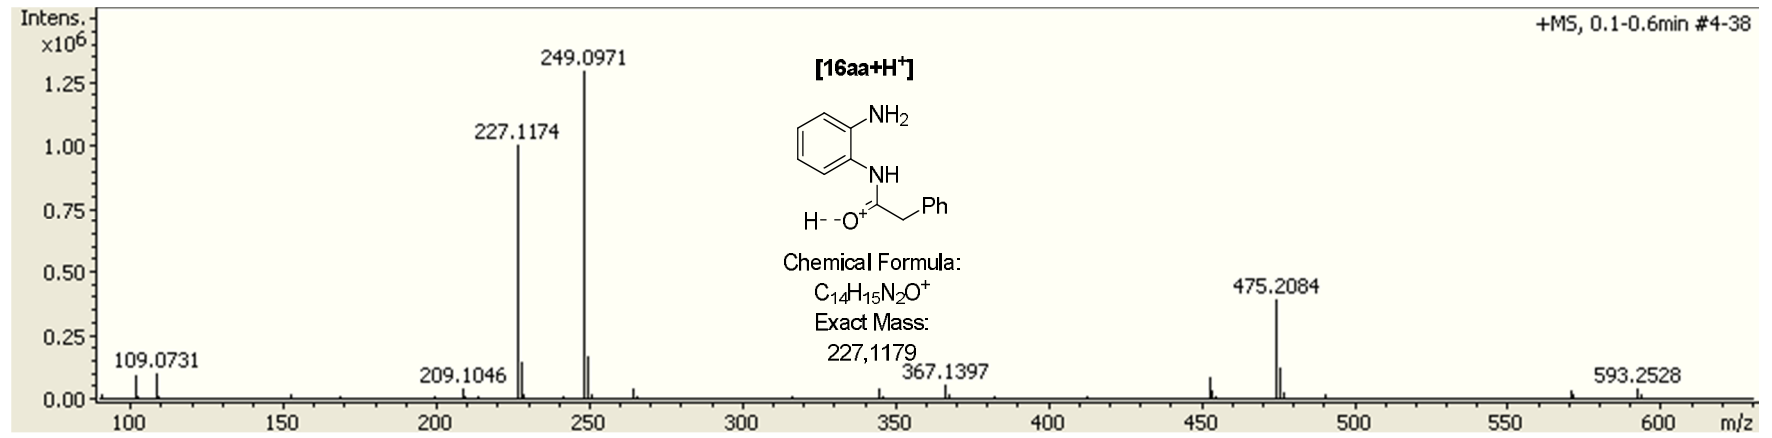

Figure S83. HRMS Chart for *N*-(2-aminophenyl)-2-phenylacetamide (**16aa**)

### HRMS spectral chart for 2-Benzyl-1*H*-benzo[*d*]imidazole 17aa

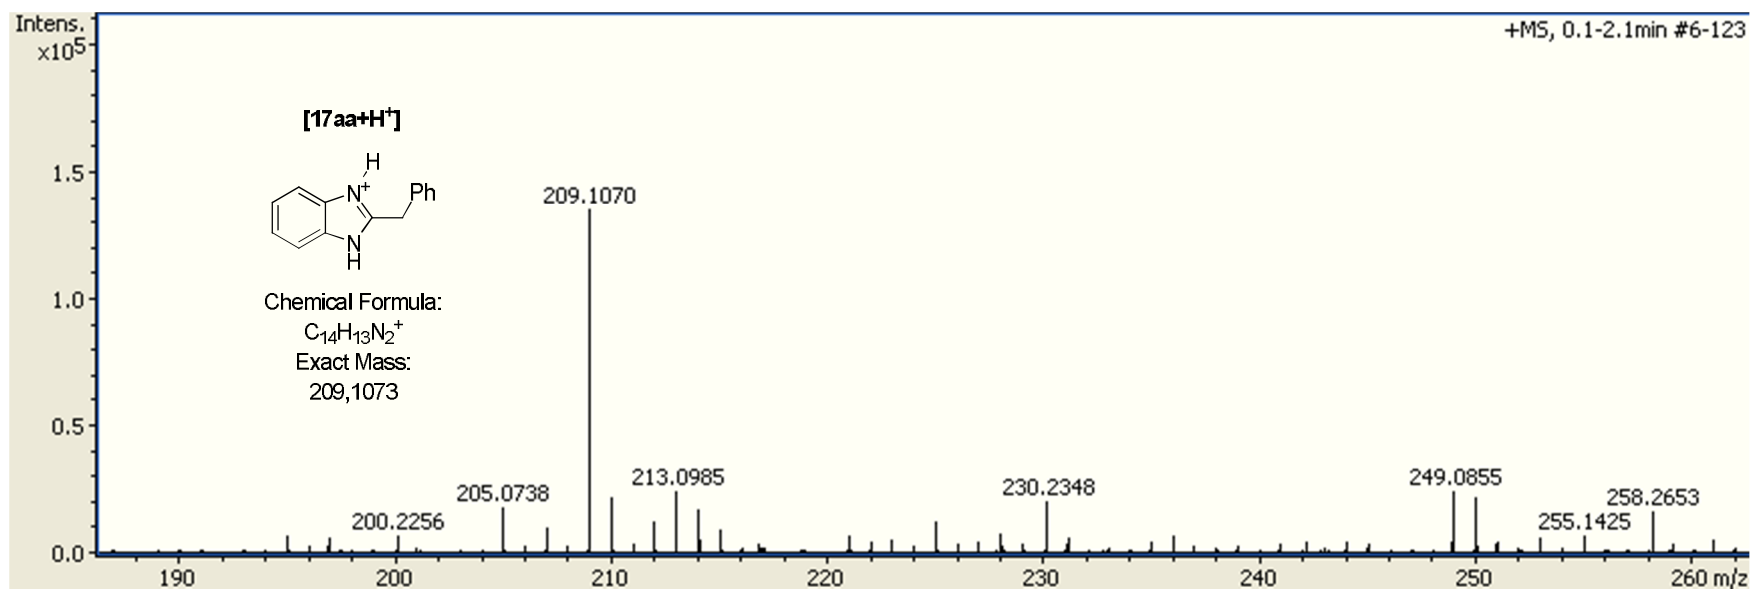

Figure S84. HRMS Chart for 2-Benzyl-1*H*-benzo[*d*]imidazole (**17aa**)

HRMS spectral chart of aqueous phase of the reaction between hydroxylactam **1aa** and phenylenediamine **6a**

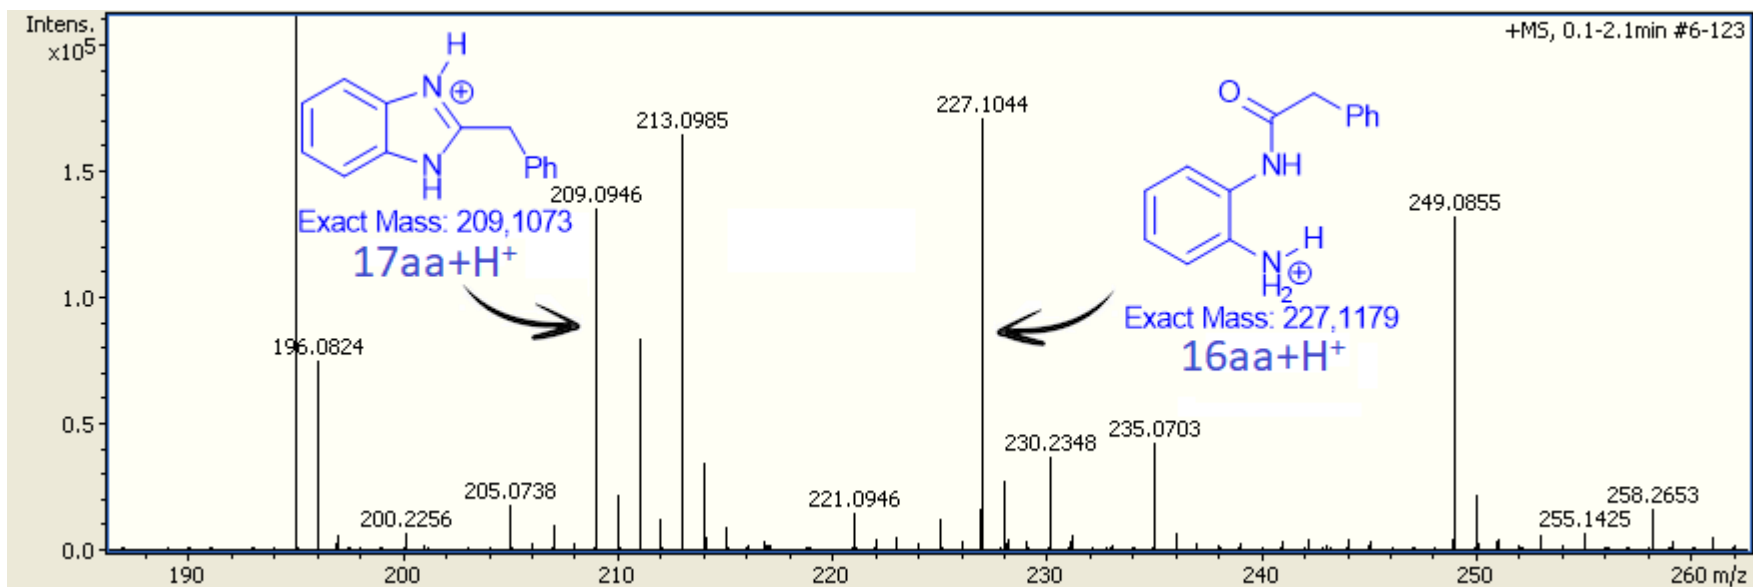

Figure S85. Mass spectrum of aqueous phase of the reaction between hydroxylactam **1aa** and phenylenediamine **6a**
